# The role of actin protrusion dynamics in cell migration through a degradable viscoelastic extracellular matrix: Insights from a computational model

Tommy Heck<sup>1</sup>, Diego A. Vargas<sup>1</sup>, Bart Smeets<sup>2</sup>, Herman Ramon<sup>2</sup>, Paul Van Liedekerke<sup>3,4</sup>, Hans Van Oosterwyck<sup>1,5</sup><sup>\*</sup>

**1** Biomechanics Section, KU Leuven, Leuven, Belgium

**2** MeBioS, KU Leuven, Leuven, Belgium

**3** INRIA de Paris and Sorbonne Universités UPMC Univ paris 6, LJLL Team Mamba, Paris, France

**4** IfADo - Leibniz Research Centre for Working Environment and Human Factors, Dortmund, Germany

**5** Prometheus, Division of Skeletal Tissue Engineering, KU Leuven, Leuven, Belgium

 These authors are joint last author.

\* Corresponding author

E-mail: [hans.vanoosterwyck@kuleuven.be](mailto:hans.vanoosterwyck@kuleuven.be)

## Abstract

Actin protrusion dynamics plays an important role in the regulation of three-dimensional (3D) cell migration. Cells form protrusions that adhere to the surrounding extracellular matrix (ECM), mechanically probe the ECM and contract in order to displace the cell body. This results in cell migration that can be directed by the mechanical anisotropy of the ECM. However, the subcellular processes that regulate protrusion dynamics in 3D cell migration are difficult to investigate experimentally and therefore not well understood. Here, we present a computational model of cell migration through a degradable viscoelastic ECM. The cell is modeled as an active deformable object that captures the viscoelastic behavior of the actin cortex and the subcellular processes underlying 3D cell migration. The ECM is regarded as a viscoelastic material, with or without anisotropy due to fibrillar strain stiffening, and modeled by means of the meshless Lagrangian smoothed particle hydrodynamics (SPH) method. ECM degradation is captured by local fluidization of the material and permits cell migration through the ECM. We demonstrate that changes in ECM stiffness and cell strength affect cell migration and are accompanied by changes in number, lifetime and length of protrusions. Interestingly, directly changing the total protrusion number or the average lifetime or length of protrusions does not affect cell migration. A stochastic variability in protrusion lifetime proves to be enough to explain differences in cell migration velocity. Force-dependent adhesion disassembly does not result in faster migration, but can make migration more efficient. We also demonstrate that when a number of simultaneous protrusions is enforced, the optimal number of simultaneous protrusions is one or two, depending on ECM anisotropy. Together, the model provides non-trivial new insights in the role of protrusions in 3D cell migration and can be a valuable contribution to increase the understanding of 3D cell migration mechanics.

## Author summary

The ability of cells to migrate through a tissue in the human body is vital for many processes such as tissue development, growth and regeneration. At the same time, abnormal cell migration is also playing an important role in many diseases such as

cancer. If we want to be able to explain the origin of these abnormalities and develop new treatment strategies, we have to understand how cells are able to regulate their migration. Since it is challenging to investigate cell migration through a biological tissue in experiments, computational modeling can provide a valuable contribution. We have developed a computational model of cell migration through a deformable and degradable material that describes both mechanics of the cell and the surrounding material and subcellular processes underlying cell migration. This model captures the formation of long and thin protrusions that adhere to the surrounding material and that pull the cell forward. It provides new non-trivial insights in the role of these protrusions in cell migration and the regulation of protrusion dynamics by cell strength and anisotropic mechanical properties of the surrounding material. Therefore, we believe that this model can be a valuable tool to further improve the understanding of cell migration.

## Introduction

Cell migration is vital for many processes in the human body such as tissue development, wound healing and angiogenesis. In order to migrate, cells adhere to the extracellular matrix (ECM), generate protrusive and contractile forces and degrade the ECM where necessary. These cellular processes are highly affected and regulated by the surrounding ECM, which allows cells to migrate up chemical gradients (chemotaxis), stiffness gradients (durotaxis) and adhesion ligand gradients (haptotaxis) [1]. Cell migration has been studied extensively on 2D substrates as this reduces the complexity of the visualization of cellular processes and the calculation of traction forces applied to the substrate. Cells adhere to and spread on a 2D substrate which gives them a flat shape. They migrate by membrane extension through actin polymerization in wide and flat structures called lamellipodia, followed by adhesion to the substrate at focal adhesion sites, contraction of the cell body by actin stress fibers and retraction of focal adhesions at the rear [2]. However, the physical environment for most cells is three-dimensional (3D) which affects both the shape and migration modes of cells. While cell migration on 2D substrates is well characterized, the subcellular processes underlying 3D cell migration and their dependency on the physical properties of the ECM are less understood. Reported cell migration modes range from bleb-based to

protrusion-based [3]. In the former, intracellular pressure results in membrane expulsions called blebs that form without actin polymerization [4]. Cells use these blebs to squeeze through existing pores in the ECM. In the latter mode, actin polymerization results in the formation of actin-rich protrusions that adhere to the ECM through focal adhesions. Actomyosin contraction results in movement of the cell body in the direction of formed protrusions, similar to lamellipodia-driven migration on 2D substrates [5]. While the migration mode of actin protrusion-driven cell migration has been described, it remains unclear how cells regulate their protrusion dynamics (*e.g.* number of protrusions and protrusion length, lifetime and contractile strength) and what the role is of protrusion dynamics in achieving efficient cell migration that can adapt to the surrounding ECM [6, 7].

In order to migrate cells apply forces to their surrounding ECM by actomyosin contraction. Cells are able to adjust these contractile forces to the local ECM stiffness by a process called mechanosensing [6]. Wolfenson *et al.* demonstrated that fibroblasts cultured on fibronectin-coated elastomeric pillars moved opposing pillars towards each other by actomyosin-based contraction with a constant number of displacement steps per second, resulting in a contraction velocity of  $2.5 - 3.5 \text{ nms}^{-1}$  [8]. The contraction lasted until a force of approximately 20 pN was reached, after which contraction was paused for 1 – 2 s, possibly due to an increased myosin-actin stability at high loads. Once the threshold force was reached, recruitment of  $\alpha$ -actinin indicated adhesion reinforcement. This could be caused by conformational changes of adhesion molecules upon mechanical stretching as has been observed before for vinculin binding to talin [9]. After the pause the contractile force on the adhesions increased until a higher threshold force was reached, indicating that also the actomyosin contraction reinforces. The number of contraction steps required to reach a threshold force was highly dependent on ECM rigidity. On soft pillars more steps are required to build up the force than on stiff pillars as the soft pillars deflect more. Therefore, on stiff pillars the threshold force is reached more frequent and as a consequence a higher actomyosin contractile force and a stronger focal adhesion are obtained. This results in the same displacement of the pillars independent of their stiffness. A similar effect has been observed for epithelial cells on a micropillar substrate [10]. In this way cells are able to generate more force in the direction of protrusions that sense a higher local ECM stiffness. However, it is not

clear how this affects 3D migration of cells that extend multiple actin protrusions at the same time.

Computational models have been developed to unravel the mechanisms underlying 3D cell migration. Kim *et al.* developed a model of cell invasion into a discrete fibrillar ECM [11]. The cell, which is modeled as an active deformable object, extends small finger-like protrusions called filopodia that probe the local ECM stiffness. The polarization direction of the cell rotates towards the direction of highest ECM stiffness and defines filopodia lifetime and the direction of lamellipodium protrusion. This model provides great insight in the way cells can orient themselves towards the direction of higher ECM stiffness by mechanosensing of the local environment. However, cell migration in this model is not the result of contraction of long and thin protrusions to displace the cell body, as has been reported for 3D cell migration. Instead, migration is the result of lamellipodium protrusion and actomyosin contraction at the cell body. Moure *et al.* developed a model for 2D and 3D, spontaneous and chemotactic amoeboid migration [12–14]. They used the phase-field method to track the cell and their model captures myosin and globular and filamentous actin. The cell migrates by expanding and retracting pseudopods. Pseudopods expand by local actin protrusion that generates an outward stress to the membrane. Their dynamics (growth time, time interval of initiation and location of initiation) is regulated by probability functions derived from experiments. In the case of chemotactic migration the probability of pseudopod initiation is modified according to the average chemoattractant gradient at the cell membrane. The model is able to simulate realistic cell shape dynamics and migration paths for mesenchymal migration through a fibrous environment, with fibers modeled as rigid obstacles. However, it does not capture a degradable and deformable ECM yet for the cell to migrate through. Zhu *et al.* modeled both the cell and ECM as a collection of nodes and springs [15]. By varying processes as actin protrusion, actomyosin contraction, cell-ECM adhesion and ECM degradation they were able to obtain six experimentally described migration modes including mesenchymal and blebbing. Their mesenchymal migration mode is characterized by membrane expansion at the front due to actin polymerization and retraction of the rear due to actomyosin contraction. However, it does not capture the formation, mechanosensing and contraction of multiple competing thin protrusions. Ribeiro *et al.*, and in a follow up study Merino-Casallo *et*

*al.*, captured this protrusion competition in their mechanical cell model by extending protrusions represented by vectors attached to a central connection point [16, 17]. Protrusion growth and retraction are regulated by chemosensing and constrained by the ECM. The cell migrates by retraction of the longest protrusion and the model is able to perform chemotaxis. However, the model does not capture contact of the cell body with the solid ECM and does not include mechanosensing.

Here, we present a computational model of cell migration through a degradable viscoelastic ECM. The cell is modeled as an active deformable object that captures the viscoelastic behavior of the actin cortex and the subcellular processes underlying 3D cell migration. The ECM is regarded as a viscoelastic material and is modeled by means of the smoothed particle hydrodynamics (SPH) method. Compared to the models described above, our model both describes the mechanics of the actin cortex and the ECM and captures the formation of competing protrusions that adhere to the ECM, probe the local ECM and contract in order to displace the cell body. We use this model to investigate the role of protrusion dynamics and ECM mechanics on cell migration. We demonstrate that changes in ECM stiffness and cell strength affect cell migration and are accompanied by changes in protrusion dynamics (*i.e.* total number of protrusions, protrusion length and protrusion lifetime), while directly changing protrusion dynamics does not affect cell migration. A stochastic variability of protrusion lifetimes is enough to regulate cell migration. Force-dependent adhesion disassembly can increase the efficiency of cell migration by reducing the number of protrusions, but does not result in faster migration. We also demonstrate that the optimal number of simultaneous protrusions for cell migration is one or two, depending on the anisotropy of the ECM.

## Methods

Our modeling strategy is a hybrid approach in which the individual cell is represented by an agent-based model and the degradable viscoelastic ECM by a meshless Lagrangian particle-based method (see Fig 1A). The cell is modeled as an active 2D deformable object (see [18, 19] as examples of deformable cell models), for which the boundary is discretized by viscoelastic elements, that represents the viscoelastic

behavior of the membrane and underlying actin cortex and the interaction with the  
ECM. The cell model captures the subcellular processes underlying cell migration, *i.e.*  
protrusion formation, cell-ECM adhesion, ECM mechanics-regulated actomyosin  
contraction and ECM degradation.

**Fig 1. Cell migration model overview.** (A) Overview of the model of cell migration through a degradable viscoelastic matrix. The cell forms protrusions at the cell front that degrade the ECM particles and adhere to the ECM. The cell polarization direction rotates towards existing adhesion directions and defines the cell front (light blue particles) and rear (dark blue particles). Viscoelastic ECM particles (white) are degraded gradually by fluidization from partially degraded particles (grey) to fully degraded ECM particles (black). The ECM is modeled as a continuous material by using a smoothing kernel. (B) Schematic overview of the mechanical representation of the actin cortex. The following forces are indicated: cortex elastic force  $\mathbf{F}^s$ , cortex viscous force  $\mathbf{F}^\eta$ , cortex bending force  $\mathbf{F}^{\text{bend}}$ , area conservation force  $\mathbf{F}^A$ , cortex-ECM elastic contact force  $\mathbf{F}^\sigma$ , protrusion force  $\mathbf{F}^{\text{prot}}$ , adhesion force  $\mathbf{F}^{\text{adh}}$ , actomyosin contractile force  $\mathbf{F}^{\text{am}}$  and maturation force  $\mathbf{F}^{\text{mat}}$  (see also Eq 1).

The ECM is regarded as a 2D continuous viscoelastic material that represents  
nanoporous non-fibrillar hydrogels such as polysaccharide based gels (agarose, alginate)  
or synthetic gels (polyethylene glycol (PEG)). A 2D planar cross section is considered in  
order to reduce computational cost and complexity. Strain stiffening of the material is  
added in some simulations to model the nonlinear and anisotropic mechanical behavior  
of fibrillar hydrogels like collagen gels. The ECM is modeled by means of the meshless  
Lagrangian SPH method. In this method, a continuous material is discretized into  
elements, called particles, for which material properties and variables (*e.g.* mass,  
density, velocity and hydrostatic pressure) are computed. The use of a smoothing kernel  
allows to discretize the continuum laws of fluid and solid mechanics. As discussed  
before, the meshless character of SPH allows to naturally capture discrete processes in a  
continuum material [20]. Besides, meshless methods can deal with deformable  
interfaces [21], large deformations and discontinuities [20]. In the next sections the  
implementation of cell and ECM mechanics and protrusion dynamics is described. An  
overview of the model parameters is given in Table 1.

## Deformable cell model

The cell model consists of viscoelastic elements (particles connected by a line segment  
representing an elastic spring and a viscous damper in parallel) that capture the

**Table 1.** Model parameters.

|                                   | Parameter                              | Symbol                   | Value                 | Units                      | Ref                      |
|-----------------------------------|----------------------------------------|--------------------------|-----------------------|----------------------------|--------------------------|
| <b>Cell</b>                       | radius                                 | $R$                      | 15                    | $\mu\text{m}$              | [5]                      |
|                                   | initial spring rest length             | $l_0$                    | 0.4                   | $\mu\text{m}$              | model setup <sup>2</sup> |
|                                   | cortex stiffness                       | $k_s$                    | $2.8 \times 10^{-3}$  | N/m                        | trial runs               |
|                                   | cortex viscosity                       | $\eta_c$                 | $2.5 \times 10^{-3}$  | Ns/m                       | trial runs               |
|                                   | bending rigidity constant              | $k_{\text{bend}}$        | $2 \times 10^{-15}$   | Nm                         | trial runs               |
|                                   | area constraint constant               | $k_A$                    | 0.71                  | $\text{N}/\text{m}^2$      | trial runs               |
|                                   | repulsive force constant               | $k_{\text{rep}}$         | 1.4                   | $\text{N}/\text{m}^{1.5}$  | trial runs               |
|                                   | repulsive force threshold distance     | $d_{\text{rep}}$         | 0.2                   | $\mu\text{m}$              | trial runs               |
|                                   | liquid drag force constant             | $\gamma_{\text{liquid}}$ | 40                    | $\text{Pa} \cdot \text{s}$ | trial runs               |
|                                   | polarization rate                      | $r_{\text{pol}}$         | $1.1 \times 10^{-3}$  | $\text{s}^{-1}$            | [11, 22]                 |
| <b>Protrusion</b>                 | protrusion formation rate              | $r_{\text{prot}}$        | $6 \times 10^{-5}$    | $\text{s}^{-1}$            | [23] <sup>1</sup>        |
|                                   | protrusion particle width              | $w_{\text{prot}}$        | 20                    |                            | model setup <sup>2</sup> |
|                                   | protrusion force particle width        | $w_f$                    | 3                     |                            | model setup <sup>2</sup> |
|                                   | protrusion cortex stiffness            | $k_{s,\text{prot}}$      | $2.8 \times 10^{-6}$  | N/m                        | trial runs               |
|                                   | protrusion force                       | $F_{\text{prot}}$        | 0.32                  | nN                         | [23, 24] <sup>1</sup>    |
|                                   | protrusion time                        | $T_{\text{prot}}$        | 400                   | s                          | [23, 24] <sup>1</sup>    |
|                                   | protrusion deflection rate             | $r_{\text{defl}}$        | 0.1                   | $\text{s}^{-1}$            | trial runs               |
|                                   | protrusion finish time                 | $T_{\text{finish}}$      | 400                   | s                          | trial runs               |
| <b>Adhesion</b>                   | adhesion stiffness                     | $k_{\text{ad}}$          | $2 \times 10^{-3}$    | N/m                        | trial runs               |
|                                   | initial adhesion length                | $l_{0,\text{adh}}$       | 5                     | $\mu\text{m}$              | model setup <sup>2</sup> |
|                                   | minimal disassembly rate               | $r_{\text{off,min}}$     | $2.78 \times 10^{-4}$ | $\text{s}^{-1}$            | [23, 24] <sup>1</sup>    |
|                                   | zero force disassembly rate            | $r_{\text{off},0}$       | 0.2                   | $\text{s}^{-1}$            | [25] <sup>1</sup>        |
|                                   | force-dependent disassemble parameter  | $\zeta_{\text{diss}}$    | $2 \times 10^4$       |                            | [25] <sup>1</sup>        |
|                                   | adhesion rupture constant              | $f_{\text{rupt}}$        | 1.0                   |                            |                          |
| <b>Maturation and contraction</b> | reference actomyosin force             | $F_{\text{am}}$          | 0.6                   | nN                         | trial runs               |
|                                   | maturation time                        | $T_{\text{mat}}$         | 600                   | s                          | trial runs               |
|                                   | optimal cortex curvature               | $\kappa_0$               | -0.15                 |                            | [26]                     |
|                                   | myosin II-binding curvature range      | $\kappa_w$               | 0.25                  |                            | [26]                     |
| <b>ECM degradation</b>            | degradation rate at protrusion tip     | $r_{\text{degr,tip}}$    | 0.2                   | $\text{s}^{-1}$            | trial runs               |
|                                   | degradation distance at protrusion tip | $d_{\text{degr,tip}}$    | 2.4                   | $\mu\text{m}$              | model setup <sup>2</sup> |
|                                   | degradation rate at protrusion         | $r_{\text{degr,prot}}$   | 0.033                 | $\text{s}^{-1}$            | trial runs               |
|                                   | degradation distance at protrusion     | $d_{\text{degr,prot}}$   | 1.4                   | $\mu\text{m}$              | model setup <sup>2</sup> |
|                                   | degradation rate at cell body          | $r_{\text{degr,cell}}$   | 0.033                 | $\text{s}^{-1}$            | trial runs               |
|                                   | degradation distance at cell body      | $d_{\text{degr,cell}}$   | 1.9                   | $\mu\text{m}$              | model setup <sup>2</sup> |
| <b>ECM SPH</b>                    | solid hydrostatic pressure threshold   | $p_{\text{th,degr}}$     | 20                    | Pa                         | [27, 28] <sup>1</sup>    |
|                                   | particle distance                      | $dp$                     | 2.0                   | $\mu\text{m}$              |                          |
|                                   | smoothing length                       | $h$                      | 2.6                   | $\mu\text{m}$              |                          |
| <b>Homogeneous ECM</b>            | initial density                        | $\rho_0$                 | 1000                  | $\text{kg}/\text{m}^3$     |                          |
|                                   | Young's modulus                        | $E_{\text{ECM}}$         | 200                   | Pa                         |                          |
|                                   | Poisson's ratio                        | $\nu$                    | 0.45                  |                            |                          |
| <b>Strain stiffening</b>          | dynamic viscosity                      | $\mu$                    | 1000                  | $\text{Pa} \cdot \text{s}$ |                          |
|                                   | linear stiffness fibers                | $k_0$                    | $1 \times 10^3$       | N/m                        | [29]                     |
|                                   | strain stiffening onset strain         | $\epsilon_s$             | 0.075                 |                            | [29]                     |
|                                   | exponential strain stiffening constant | $d_s$                    | 0.033                 |                            | [29]                     |

1 Parameters are fitted to mimic protrusion, adhesion and contraction dynamics observed in experiments.

2 Parameters are selected based on the cell and ECM resolution.

viscoelastic behavior of the actin cortex underlying the cell membrane. As cells migrate 135  
in a low Reynolds number environment, inertial forces can be neglected. Therefore, the 136



conservation of momentum equation for a boundary particle  $i$  of the cell reads:

$$\begin{aligned} & \sum_j \eta_c (\hat{\mathbf{e}}_{ij} \cdot \mathbf{v}_{ij}) \hat{\mathbf{e}}_{ij} + \sum_k \Gamma_{ik} \mathbf{v}_{ik} + \gamma_{liquid} \mathbf{v}_i \\ & = \mathbf{F}_i^s + \mathbf{F}_i^{bend} + \mathbf{F}_i^A + \mathbf{F}_i^{rep} + \mathbf{F}_i^\sigma + \mathbf{F}_i^{prot} + \mathbf{F}_i^{adh} + \mathbf{F}_i^{am} + \mathbf{F}_i^{mat}, \end{aligned} \quad (1)$$

with on the left-hand side the velocity-dependent terms (drag forces) and on the right-hand side all the forces that work on the cell boundary (see Fig 1B). The passive cell mechanics is modeled with an actin cortex elastic spring force  $\mathbf{F}^s$ , a cortex bending rigidity force  $\mathbf{F}^{bend}$ , a cell area conservation force  $\mathbf{F}^A$  and a repulsive Hertz-like force  $\mathbf{F}^{rep}$ . In order to allow the formation of long and sharp protrusions, cortex bending rigidity ( $\mathbf{F}^{bend}$ ) and cell area conservation ( $\mathbf{F}^A$ ) are assumed to be weak and applied only to prevent membrane folding and cell shrinking. The repulsive force ( $\mathbf{F}^{rep}$ ) is applied to cell particles that approach a line segment in order to prevent the cell boundary from penetrating itself. A more detailed description of the cell model mechanics can be found in S1 Text. The cell is embedded in the ECM and has physical interaction with solid particles of the ECM, which is captured by  $\mathbf{F}^\sigma$ . The remaining forces capture membrane protrusion by actin polymerization ( $\mathbf{F}^{prot}$ ), cell-ECM adhesion ( $\mathbf{F}^{adh}$ ), actomyosin contraction ( $\mathbf{F}^{am}$ ) and mechanosensing-regulated protrusion maturation ( $\mathbf{F}^{mat}$ ). These processes are described in more detail in the following sections.

The left-hand side describes dissipation of the actin cortex, with the actin cortex friction  $\eta_c$ , the velocity  $\mathbf{v}$  and the normal unit vector from particle  $j$  to  $i$   $\hat{\mathbf{e}}_{ij}$ , for connected cell boundary particles  $j$  (the notation  $\mathbf{v}_{ij} = \mathbf{v}_i - \mathbf{v}_j$  will be used for all vectors later on), viscous cell-ECM forces for contact with neighboring ECM particles  $k$  (see S2 Text) and a drag force  $\gamma_{liquid} \mathbf{v}_i$  due to interaction with the culture medium. The cell locally degrades the ECM by fluidization of solid ECM particles. By permitting these fluid particles to move through the cell boundary, the cell is allowed to migrate through the ECM. The cell model initially has a circular shape with a radius of  $15 \mu\text{m}$  and consists of 235 particles connected by line segments, with a particle distance of  $0.4 \mu\text{m}$ .

## Extracellular matrix model

The ECM is modeled as a continuous degradable viscoelastic material by the SPH method. In this method a material is divided into a set of discrete elements, called particles, for which material properties (*e.g.* mass, density, velocity and stress) are described. A Wendland smoothing kernel [30]  $W(r, h)$  (see Fig 1A), with  $r$  the distance to a neighboring particle and  $h$  the smoothing length, is used to approximate these properties and to implement the laws of fluid and solid mechanics in a discrete manner. Again, as cellular processes ( $\mu\text{m}$ -scale) occur at a low Reynolds number, viscous forces will dominate over inertial forces leading to an overdamped system. Therefore, inertial forces can be omitted from the conservation of momentum equation, resulting in the non-inertial SPH (NSPH) method. As described before [20,31], the conservation of momentum for ECM particle  $i$  in contact with neighboring particles  $j$  becomes:

$$-m_i \sum_j m_j \frac{\mu_i + \mu_j}{\rho_i \rho_j} \frac{\mathbf{x}_{ij} \cdot \nabla_i W_{ij}}{|\mathbf{x}_{ij}|^2 + \eta^2} \mathbf{v}_{ij} = m_i \sum_j m_j \left( \frac{\sigma_i}{\rho_i^2} + \frac{\sigma_j}{\rho_j^2} \right) \cdot \nabla_i W_{ij} + \mathbf{F}_i^b, \quad (2)$$

with  $m$  the mass,  $\rho$  the density,  $\mu$  the dynamic viscosity,  $\mathbf{v}$  the velocity,  $\mathbf{x}$  the position,  $\sigma$  the stress tensor,  $\nabla_i W_{ij}$  the derivative of the smoothing kernel  $W$ ,  $\eta = 0.01h^2$  a correction factor that prevents singularity when particles approach each other and  $\mathbf{F}_i^b$  body forces. The detailed implementation of this method as described before [20,31] is summarized in S2 Text. The ECM is modeled as a circular domain with a radius of  $150 \mu\text{m}$ , fixed displacement at the boundary and a particle distance  $dp = 2 \mu\text{m}$ . It is modeled as a viscoelastic material with a Young's modulus  $E_{\text{ECM}} = 200 \text{ Pa}$ , Poisson's ratio  $\nu = 0.45$  and dynamic viscosity  $\mu = 1000 \text{ Pa} \cdot \text{s}$ .

*In vivo* ECMs contain fibrillar proteins like collagen that induce nonlinear and anisotropic mechanical properties. Strain stiffening of the material by collagen is captured in some simulations (see section Optimal number of simultaneous protrusions depends on ECM anisotropy) by placing nonlinear elastic springs between ECM particles (see Fig 2A and 2B). These springs do not embody individual collagen fibers, but are a coarse-grained representation of the nonlinear mechanical material behavior. We note that alternatively, a similar nonlinear mechanical behavior of the ECM could in principle be captured by assuming a strain-dependent Young's modulus in the SPH model, but we did not pursue this option. The implementation used here is based on a

study performed by Steinwachs *et al.* in which the nonlinear stress-strain relationship of collagen due to fiber stiffening and buckling is captured in a constitutive equation that describes the mechanical behavior of the bulk material [29]. Here, strain stiffening is implemented by adding nonlinear springs between ECM particles. The total fiber spring force  $\mathbf{F}_i^{\text{fib}}$  applied on particle  $i$  from springs connected to neighboring particles  $j$  is:

$$\mathbf{F}_i^{\text{fib}} = \sum_{j \in \mathcal{S} \setminus i} -w_{ij} (f_{\text{degr},i} f_{\text{degr},j}) k_{\text{fib},ij} (\mathbf{x}_{ij} - \mathbf{x}_{0,ij}), \quad (3)$$

with  $\mathcal{S}$  the set of solid ECM particles (see S3 Text),  $\mathbf{x}_0$  the initial particle position,  $k_{\text{fib},ij}$  a strain-dependent spring stiffness and  $w_{ij}$  a factor that weighs the contribution of each spring based on the particle distance and local kernel support:

$$w_{ij} = \frac{1}{2} \left( \frac{\frac{m_i}{\rho_i} W_{ij}}{\sum_{k \in \mathcal{S} \setminus j} \frac{m_k}{\rho_k} W_{jk}} + \frac{\frac{m_j}{\rho_j} W_{ij}}{\sum_{k \in \mathcal{S} \setminus i} \frac{m_k}{\rho_k} W_{ik}} \right). \quad (4)$$

The spring stiffness  $k_{\text{fib},ij}$  depends on the strain  $\epsilon_{ij}$  between particles  $i$  and  $j$  as described in [29], but with ignoring fiber buckling:

$$k_{\text{fib}}(\epsilon_{ij}) = \begin{cases} 0 & \text{for } \epsilon_{ij} \leq 0 \\ k_0 & \text{for } 0 < \epsilon_{ij} \leq \epsilon_s, \\ k_0 e^{\frac{(\epsilon_{ij} - \epsilon_s)}{d_s}} & \text{for } \epsilon_{ij} > \epsilon_s \end{cases}, \quad (5)$$

with  $\epsilon$  the strain,  $k_0$  the linear stiffness,  $\epsilon_s$  the strain threshold for the onset of strain stiffening and  $d_s$  an exponential strain stiffening coefficient. Compared to the model of Steinwachs *et al.* fiber stiffness is neglected completely under compression. The mechanical behavior of the nonfibrillar matrix is captured with a strongly reduced Young's modulus of 10 Pa. Steinwachs *et al.* obtained values for these model parameters by fitting their finite element model to measurements of uniaxial stretching of collagen hydrogels in an extensional rheometer with different collagen concentrations (0.6, 1.2, and 2.4 mg/m) [29]. Uniaxial stretching simulations are performed with our SPH strain stiffening ECM model with the same parameter values. The results of these simulations are shown in Fig 2C) together with the results obtained in [29].

**Fig 2. SPH isotropic and anisotropic fibrillar ECM model validation.** (A) Illustration of springs (lines) between ECM particles (dots) for an isotropic fibrillar ECM and (B) an anisotropic, uniaxial fibrillar ECM. The line thickness emphasizes the weighted contribution of springs based on particle distance (see Eq 3 and 4). (C) Stress-strain curves for uniaxial stretching of hydrogels with three different collagen concentrations (0.6, 1.2, and 2.4 mg/ml, from steepest to shallowest curves). Dashed gray lines indicate extensional rheometer measurements and black solid lines indicate finite-element model fit, both recreated from data from Steinwachs *et al.* [29]. Light blue, magenta and green dashed lines show the results obtained for the fibrillar SPH model with identical material parameters ( $k_0 = 447, 1645$  or  $5208$  Pa for the 3 collagen concentrations,  $\epsilon_s = 0.075$  and  $d_s = 0.033$ ). (D) Red and yellow dashed lines show the results obtained for the anisotropic, uniaxial fibrillar SPH model stretched along the fiber direction (parallel) or perpendicular to the fiber direction.

It can be seen that the stress-strain curves obtained for our model agree very well with those obtained in [29], which indicates that our model is able to capture strain stiffening caused by collagen fibers.

Next, the model described above is adapted in order to model an anisotropic collagen gel with a preferred fiber direction. Strain stiffening springs are placed only between particles for which the angle between a prescribed fiber direction and a vector connecting these two particles is equal to or lower than  $30^\circ$  (see Fig 2B). As this strongly reduces the number of springs in the model, the linear stiffness  $k_0$  is increased to 10 kPa. The results of simulations of stretching a gel along the fiber direction or perpendicular to the fiber direction are shown in Fig 2D. It can be seen that the gel is slightly stiffer along the fiber direction, but is very soft along the direction perpendicular to the fiber direction. In this way the effect of ECM anisotropy on cell migration can be investigated.

## Protrusion dynamics

The cell migrates through the ECM by forming protrusions that adhere to and probe the local ECM and contract to displace the cell body. This section describes the dynamics of a protrusion during its lifetime. First, locations of membrane protrusion are randomly selected at the cell front, which is defined by a polarization direction of the cell (section Protrusion initiation and cell polarization). Protrusions grow by weakening the actin cortex and pushing the membrane outwards, after which the protrusion adheres to the ECM (section Protrusion growth and cell-ECM adhesion). Next, the protrusion probes the ECM and matures based on the local ECM stiffness

(section Protrusion maturation). After maturation, the protrusion contracts with a force that is scaled by the amount of maturation and thereby displaces the cell body in the adhesion direction (section Actomyosin contraction). In order to migrate the cell needs to locally degrade the ECM (section ECM degradation). Finally, the adhesion disassembles with a force-dependent probability, after which the protrusion retracts and the cortex is available again to form new protrusions (section Adhesion disassembly). Competition between protrusions, due to differences in the amount of maturation between protrusions, can then result in migration regulated by ECM properties.

### Protrusion initiation and cell polarization

Cell boundary particles can be selected to initiate the formation of a protrusion with a chosen rate  $r_{\text{prot}}$ , resulting in an exponential probability distribution of protrusion initiation. As soon as the first protrusion is initiated, the cell is polarized, with polarization direction  $\mathbf{d}_{\text{pol}}$  (see Fig 1A) equal to the protrusion growth direction  $\mathbf{d}_{\text{prot}}$  (the direction from the cell center of mass to the selected protrusion particle at protrusion initiation). This polarization direction is used to define a front, consisting of the first 50% of cell particles along the polarization direction, and a rear of the cell. Protrusions can be initialized only at the front of the cell. As adhesions have been reported to appear as a trademark of polarization [32],  $\mathbf{d}_{\text{pol}}$  targets and rotates towards the average direction of mature focal adhesions, seen from the center of mass of the cell, with a chosen polarization rate  $r_{\text{pol}}$  (see S1 Figure). After reaching this target direction,  $\mathbf{d}_{\text{adh}}$  remains unchanged until the average adhesion direction is altered again.

### Protrusion growth and cell-ECM adhesion

Protrusions form by local weakening of the actin cortex and actin polymerization underneath the membrane that pushes the membrane outwards. A protrusion consists of the selected cell particle and the first 20 particles along both directions of the cell boundary (see Fig 3A). This number of particles is chosen to allow the formation of multiple large protrusions by stretching the cell boundary, while maintaining an adequate boundary resolution relative to the resolution of the ECM. The protrusion is allowed to form only if none of these particles is already part of another protrusion. The stiffness of elastic springs between the protrusion particles is decreased by three orders

of magnitude to account for actin cortex weakening [24]. A protrusion force  $\mathbf{F}^{\text{prot}}$ ,  
caused by polymerizing actin pushing against the membrane, is applied in the  
protrusion growth direction to the central 7 particles of the protrusion. This results in a  
velocity of protrusion growth similar to the  $\sim 1.5 - 5 \mu\text{m}/\text{min}$  reported for cells  
embedded in collagen [23, 24]. Actin is assumed to polymerize in the protrusion growth  
direction. Therefore, the protrusion force on a particle is reduced when the angle  
between the local normal vector to the cell boundary  $\hat{\mathbf{n}}$  and the protrusion growth  
direction increases, resulting in a thin and sharp protrusion (see Fig 3B).

**Fig 3. Protrusion formation, maturation and contraction.** (A) Protrusion particles are selected for which the actin cortex stiffness  $k_s$  is lowered (red and yellow) and to which an actin protrusion force  $\mathbf{F}^{\text{prot}}$  is applied (red). (B) ECM particles in contact with the protrusion force particles are degraded allowing the protrusion to form. (C) At the end of protrusion growth a cell-ECM adhesion is formed at the protrusion tip. (D) Boundary particles at the protrusion base are fixed and a contractile force  $\mathbf{F}^{\text{mat}}$  is applied to the adhesion boundary particle. (E) After maturation the protrusion contracts and displaces the cell body in the protrusion direction, where the transparent circle indicates the influence area of the adhesion by using the smoothing kernel. (F) During maturation the contractile force is increased every time the adhesion is stretched above a threshold length. As the threshold is reached more frequent on a stiff ECM (red) compared to a soft ECM (blue), a protrusion generates more force in a stiffer ECM.

In order for the cell to form protrusions and migrate through a continuous ECM, the  
ECM has to be degraded. This is modeled by fluidization of ECM particles, which is  
captured by a degradation factor  $f_{\text{degr}}$  that has a value between 1 (intact solid ECM)  
and 0 (fully degraded ECM) as introduced before in [20]. ECM particles close to the  
protrusion tip or the cell body can be degraded with a chosen degradation rate.  
Contrary to the solid ECM particles, the degraded ECM is not assumed to act as a  
physical obstacle for the cell as it should be easily displaced through the nanoporous  
ECM. However, this is not possible for fluid particles in the ECM model. Instead, fluid  
particles are allowed to move freely through the cell boundary. In this way the cell can  
form tunnels by ECM degradation through which it can migrate more easily, while full  
kernel support and buildup of hydrostatic pressure in the ECM are preserved. The  
implementation of a fluid and solid ECM state requires adaptation of the SPH  
formulation and cell-ECM boundary conditions, which is described in S3 Text. ECM  
particles within a distance of  $2.4 \mu\text{m}$  (1.2 times the ECM particle distance  $dp$ ) from the  
protrusion force particles are degraded with a chosen degradation rate  $r_{\text{degr,tip}}$ , which

creates space in the ECM for the protrusion to grow. 287

When a protrusion encounters ECM while growing, it should be easier for a 288  
protrusion to grow in the direction of least resistance by deflecting away from the ECM. 289  
This is accounted for by rotating the protrusion growth direction towards the degraded 290  
ECM as described in S4 Text. The protrusion force is applied for  $T_{\text{prot}} = 400$  s, 291  
resulting in a protrusion length of 25 – 30  $\mu\text{m}$  which falls within the range of protrusion 292  
lengths of 10 – 78  $\mu\text{m}$  reported in literature [23,24]. After protrusion growth a cell-ECM 293  
adhesion is formed at the protrusion tip. The adhesion is modeled as a spring that 294  
connects the protrusion tip with a point in the ECM 5  $\mu\text{m}$  from the protrusion tip in 295  
the protrusion growth direction (see Fig 3C). The smoothing kernel is used to distribute 296  
the adhesion force over the neighboring ECM particles and to calculate the 297  
displacement of the adhesion point as the ECM deforms. By using a distribution of the 298  
adhesion rather than adhering to a single ECM particle the adhesion can bind to an 299  
arbitrary point in the continuous ECM and numerical instability due to application of a 300  
large force to a single ECM particle is prevented. 301

### Protrusion maturation 302

Cells are able to adjust their contractile force to the local ECM properties by a process 303  
called mechanosensing. Here, after the protrusion has formed and adhered to the ECM, 304  
the protrusion and adhesion mature according to the mechanosensing mechanism 305  
described by Wolfenson *et al.* [8]. An actomyosin contractile force  $\mathbf{F}^{\text{mat}}$ , with 306  
magnitude equal to a reference actomyosin contractile force  $F_{\text{am}}$  multiplied by a 307  
maturation factor  $f_{\text{mat}}$  initially set to 0.1 (with maximal contraction if  $f_{\text{mat}} = 1.0$ ), is 308  
applied to the adhesion boundary particle in the direction opposite to the protrusion 309  
growth direction and stretches both the adhesion and the ECM (see Fig 3D). For a 310  
period of 600 s,  $f_{\text{mat}}$  is increased with 0.1 every time the adhesion is stretched above a 311  
threshold length, equivalent to 98% of the applied force step of 0.1 times  $F_{\text{am}}$  (see 312  
Fig 3F). In this way, actomyosin is reinforced when actomyosin contraction and 313  
adhesion stretching are balanced. This balance is reached faster for a stiff ECM, 314  
because a stiff ECM has to be displaced less by the application of  $\mathbf{F}^{\text{mat}}$ . Therefore, this 315  
mechanism results in more actomyosin reinforcement (higher  $f_{\text{mat}}$ ) for a time period of 316  
600 s and thus stronger protrusions in stiff ECMs. It is assumed that during the 317

maturation process the actin cortex in the newly formed protrusion is not yet restored and therefore the force on the adhesion is not affected by contraction of the cell body or any other protrusion. If not, contraction of a neighboring protrusion would affect the stretching of the adhesion, which makes it very challenging to detect the moment of actomyosin reinforcement in the model. Therefore, in order to assure that stretching of the adhesion happens only due to  $\mathbf{F}^{\text{mat}}$  of the corresponding protrusion, the base of the protrusion is fixed during maturation by increasing the liquid drag force constant (see Fig 3D). At the end of the maturation phase  $f_{\text{mat}}$  is set to 0.1 times 600s divided by the average time per maturation step, with a maximal value of 1. The linear spring stiffness of the protrusion particles is restored, which represents restoring of the actin cortex under the protrusion membrane. As the actin cortex is assumed to be restored in an unstretched state, the rest length of springs between the protrusion particles is set to the new distance between the protrusion particles after protrusion formation. Finally, the contractile force  $\mathbf{F}^{\text{mat}}$  is removed from the adhesion boundary particle and replaced by contraction of the actin cortex of the entire protrusion, which allows the protrusion to displace the cell body (see Fig 3F).

### Actomyosin contraction

Cells migrate by displacing their cell body through actomyosin contraction. As Fischer *et al.* showed that F-actin, myosin IIA and myosin IIB colocalize in the cortex and form longitudinal bundles similar to stress fibers in 2D, actomyosin contraction is assumed to occur only in the actin cortex [24]. Actomyosin contraction is applied to both the cell body ( $f_{\text{mat}} = 0.05$ ) and mature protrusions and is the main driver of cell displacement. A contractile force  $\mathbf{F}^{\text{am}}$  is applied to the two particles connected by each line segment, with magnitude equal to  $F_{\text{am}}$  times the lowest  $f_{\text{mat}}$  of both particles. Therefore, the contractile force on particle  $i$  applied by the neighboring particles  $j$  is:

$$\mathbf{F}_i^{\text{am}} = \sum_j \min(f_{\text{mat},i}, f_{\text{mat},j}) f_{\text{curv},ij} F_{\text{am}} \hat{\mathbf{e}}_{ji}, \quad (6)$$

with  $f_{\text{curv}}$  a cortex curvature factor. Elliott *et al.* demonstrated that myosin II in endothelial cells associates stronger to the actin cortex at regions of low cortex curvature [26]. Myosin II contractility at these regions acts to maintain this minimal



curvature, thereby functioning as a positive feedback mechanism that regulates cell shape and protrusion assembly and disassembly. In order to capture this curvature-dependent contraction, the contractile force is scaled by a curvature factor  $f_{\text{curv}}$  which has a value between 0 and 1 based on the local cortex curvature  $\kappa$ . The dependence of  $f_{\text{curv}}$  on the local curvature is based on experimental data provided by Elliott *et al.* as explained in S5 Text [26]. In order to allow contraction of protrusions and prevent that the cell boundary keeps growing as more protrusions are formed, the rest length of the elastic actin cortex springs is reduced as the boundary contracts. For all line segments not part of a growing or maturing protrusion, the rest length is set to the current distance between the boundary particles if this distance is smaller than the current rest length and longer or equal to the initial rest length.

### ECM degradation

As protrusions contract, the cell body is pushing against the ECM. In order to allow movement of the cell body, the cell degrades the ECM by proteolytic enzymes like matrix metalloproteinases. Wolf *et al.* demonstrated that proteolysis of collagen fibers does not take place at the protrusion tip, but rather at the cell body where sterically impeding fibers are targeted [27, 28]. Therefore, solid ECM particles within 1.9  $\mu\text{m}$  (slightly shorter than the ECM particle distance of 2  $\mu\text{m}$ ) from the cell boundary that is not part of a protrusion ( $d_{\text{degr,cell}}$ ) and with a solid hydrostatic pressure above a threshold pressure  $p_{\text{th,degr}}$  are degraded with a chosen degradation rate  $r_{\text{degr,cell}}$ , representing degradation of the sterically impeding ECM. In order to prevent numerical instability, solid ECM particles within 1.4  $\mu\text{m}$  from the protrusion and with a solid hydrostatic pressure above  $p_{\text{th,degr}}$  are degraded with a chosen degradation rate  $r_{\text{degr,prot}}$ .

### Adhesion disassembly

Protrusions can contract and pull the cell body until the adhesion disassembles. Here, the adhesion can disassemble with a force-dependent rate  $r_{\text{off}}$ . Stricker *et al.* observed that inhibition of myosin II-activity reduces the lifetime of mature adhesions, but only at almost complete loss of cellular tension [25]. On the other hand the adhesion is assumed to rupture at high load. The force-dependent adhesion disassembly rate, scaled

by the maturation factor, is implemented as:

$$r_{\text{off}} = \begin{cases} r_{\text{off,min}} + r_{\text{off,0}} e^{-\frac{\zeta_{\text{diss}} \|\mathbf{F}^{\text{adh}}\|}{f_{\text{mat}}}} & \text{for } \|\mathbf{F}^{\text{adh}}\| < f_{\text{rupt}} f_{\text{mat}} F_{\text{am}} \\ 1 \times 10^6 & \text{for } \|\mathbf{F}^{\text{adh}}\| \geq f_{\text{rupt}} f_{\text{mat}} F_{\text{am}} \end{cases} \quad (7)$$

with  $r_{\text{off,min}}$  a minimal disassembly rate at normal contractile load,  $r_{\text{off,0}}$  an increase in disassembly rate at zero load,  $f_{\text{rupt}}$  a parameter that defines how much force the adhesion can carry with respect to its own contractile strength before mechanical rupture and  $\zeta_{\text{diss}}$  a parameter that regulates the increase in disassembly rate for low adhesion force (see Fig 4A). Adhesion rupture is implemented with a large disassembly rate of  $1 \times 10^6$ . The force-dependent adhesion disassembly rate results in an average lifetime  $\tau_{\text{adh}} = \frac{1}{r_{\text{off}}}$  (see Fig 4B) and an exponential lifetime probability density function:

$$P(t_{\text{adh}} > t) = e^{-\frac{t}{\tau_{\text{adh}}}} \quad \text{for } t \geq 0, \quad (8)$$

with  $t_{\text{adh}}$  the lifetime of a single adhesion. Both the average adhesion lifetime  $\tau_{\text{adh}}$  and the lifetime of a single adhesion  $t_{\text{adh}}$  represent the lifetime excluding the time for maturation during which adhesions cannot disassemble in the model. When the adhesion disassembles the protrusion continues to contract for  $T_{\text{finish}} = 400$  s after which  $f_{\text{mat}}$  is reset to 0.05 (which represents low contractile force in the cell body) and the protrusion particles are available again to form a new protrusion.

**Fig 4. Force-dependent adhesion disassembly.** (A) Force-dependent adhesion disassembly rate ( $r_{\text{off}}$ ) and (B) accompanying average adhesion lifetime ( $\tau_{\text{adh}}$ ) as function of adhesion force ( $\mathbf{F}^{\text{adh}}$ ) for example maturation factor  $f_{\text{mat}} = 0.5$  and baseline parameter values: reference actomyosin contractile force  $F_{\text{am}} = 1.2$  nN, minimal disassembly rate  $r_{\text{off,min}} = 2.778 \times 10^{-4} \text{ s}^{-1}$ , increase in disassembly rate at zero force  $r_{\text{off,0}} = 0.2 \text{ s}^{-1}$  and force-dependent disassembly rate parameter  $\zeta_{\text{diss}} = 2 \times 10^4, 4 \times 10^4$  and  $8 \times 10^4$  (see Eq 7 for parameter meanings).

## Model implementation

All simulations in this manuscript are performed using the C++ particle-based software called Mpacts (<http://dem-research-group.com>). The time step, which appears to be limited by the stiff adhesion spring (required for accurate ECM probing in the

maturation phase), is set to 0.4 s. The explicit Euler method is used to integrate the density, stress and position of particles in each time step.

## Results

### Stochastic variability in protrusion lifetime regulates cell migration

A parameter study is performed to investigate the effect of protrusion dynamics and the ECM stiffness on cell migration. Multiple sets of cell migration simulations are performed in which a single parameter is varied, while the other parameter values are fixed to values shown in Table 1. In these simulations the cell is embedded in a viscoelastic ECM and migrates for 6 hours. As protrusion initiation and adhesion disassembly are modeled as a stochastic process, 12 simulations are run for each parameter value in a simulation set. In each set simulations are run for 5 different parameter values, resulting in a total of 60 simulations per set. As different protrusions should mature similar in a homogeneous ECM and should thus become equally strong, they are not expected to be strong enough to rupture adhesions of other protrusions. Therefore, the adhesion rupture parameter  $f_{rupt}$  (see Eq 7) is set very high to prevent the occasional rupture of an adhesion by the contractile force of its own protrusion.

First, the effect of the ECM is investigated by varying the ECM stiffness  $E_{ECM}$  in a range of 50 – 400 Pa. Cells shapes after 6 hours of migration and cell migration paths are shown in Fig 5A and Fig 5B. Migration of the cell through a degradable ECM at various time points of a simulation is shown in Fig 6 and videos of cell migration in a 100 Pa and 400 Pa ECM are shown in supplementary material (Videos S1 – S4). For ECM stiffness values of 50 – 200 Pa an increase in ECM stiffness results in a higher average absolute migration velocity ( $v_{migr,abs}$ , cell position after 6 hours minus initial cell position, divided by 6 hours), a higher total number of protrusions in 6 hours ( $\#prot$ ), a lower average protrusion lifetime ( $\tau_{prot}$ , excluding the time for protrusion growth  $T_{prot}$  and maturation  $T_{mat}$ ) (see Fig 7) and a slightly shorter average protrusion length  $l_{prot}$ . Besides, correlation between simulation readouts shows that there is a significant correlation between absolute migration velocity and protrusion length, total

number of protrusions and protrusion lifetime (see S2 Figure). As the ECM stiffness increases, protrusions mature more (*i.e.* reach a higher  $f_{\text{mat}}$ ) and become stronger. A stronger contraction of the protrusion actin cortex leads to faster pulling of the cell body towards the adhesion and therefore earlier relaxation of the cortex when it reaches its minimal length. This means that the force on the adhesion is reduced faster, which increases the adhesion disassembly rate and thereby decreases the average protrusion lifetime. Automatically, as the average protrusion lifetime drops, a new protrusion can be formed earlier, resulting in a higher total number of protrusions during 6 hours of migration. This explains why cells migrate further away from their initial position in an ECM with a higher stiffness. An increase in ECM stiffness in the range of 200 – 400 Pa does not show significant changes in cell migration velocity, total number of protrusions and average protrusion lifetime (see Fig 7), although the protrusion maturation still increases significantly for these ECM stiffness values. This can be explained from the fact that the cell usually forms 2 or 3 protrusions that can stabilize each other by pulling on the cell body in different directions. As long as a protrusion cannot pull the cell body towards the adhesion, the protrusion maintains its contractile force, which preserves a high adhesion force and thus a low adhesion disassembly rate in the order of  $r_{\text{off,min}}$ . Only when one of the adhesions of competing protrusions disassemble, pulling of the cell body towards the competing protrusion (and its shortening) can start, which results in a decrease in force on the remaining adhesion and thus an increase in adhesion disassembly rate. At high protrusion strength (high  $f_{\text{mat}}$ ) the gain in protrusion contraction speed with further increase in protrusion strength appears to be negligible compared to the long protrusion strength independent phases in which protrusions are formed or compete with and stabilize each other. Therefore, an increase in protrusion strength at high ECM stiffness is found to not further increase cell migration velocity.

**Fig 5. Cell shapes and pathways for different ECM stiffnesses.** (A) Cell shapes after 6 hours of migration and (B) cell migration paths for cell migration through an ECM with ECM stiffness of 50, 100, 200, 300 and 400 Pa (left to right). The black circle indicates the ECM boundary with a radius of 150  $\mu\text{m}$ . For each ECM stiffness 12 simulations were run.

Next, the effect of cell strength is investigated by varying the reference actomyosin contractile force  $F_{\text{am}}$  in a range of 0.4 – 2 nN. This change in cell strength is not expected to affect the number of maturation steps for a protrusion, but will change the

**Fig 6. Simulation result of cell migration through a degradable viscoelastic ECM.** The cell is polarized, with the front colored in turquoise and the rear in blue. The solid ECM ( $E = 400$  Pa) is represented by grey particles and the degraded ECM by black particles. Arrows represent the displacement in the solid ECM with respect to the initial particle positions. The cell forms multiple protrusions and creates a tunnel by degrading the ECM. A video of this simulation can be found in S3 Video

**Fig 7. Results of a cell migration model parameter study.** Box plots of average absolute cell migration velocity ( $v_{\text{migr,abs}}$ ), total number of protrusions ( $\#prot$ ), protrusion lifetime ( $\tau_{\text{prot}}$ ) and protrusion length ( $l_{\text{prot}}$ ) as function of 5 different model parameters: ECM stiffness ( $E_{\text{ECM}}$ , first row), cell strength (reference actomyosin contractile force  $F_{\text{am}}$ , second row), total number of protrusions (protrusion initiation rate  $r_{\text{prot}}$ , third row), average protrusion lifetime (adhesion disassembly rate at normal load  $r_{\text{off,min}}$ , fourth row) and average protrusion length (protrusion growth time  $T_{\text{prot}}$ , fifth row). For each parameter 5 different parameter values were evaluated and for each parameter value 12 simulations were run. Statistical significance: \*  $p < 0.05$ , \*\*  $p < 0.01$ , \*\*\*  $p < 0.005$ . Outliers shown in gray.

contractile force of both the protrusions and the cell body (see Eq 6). An increase in 452  
cell strength results in similar effects as seen for an increase in ECM stiffness (see Fig 7). 453  
Again, a significant increase in average absolute migration velocity and total number of 454  
protrusions and a decrease in average protrusion lifetime are observed for an increase in 455  
cell strength at low reference actomyosin contractile force values. At high cell strength 456  
values no significant further changes are observed. 457

As a change in average absolute migration velocity in these two simulation sets is 458  
accompanied by a higher total number of protrusions, a lower average protrusion 459  
lifetime and, in the case of varying ECM stiffness, a lower average protrusion length, the 460  
influence of these three cellular properties on cell migration is investigated. First, the 461  
total number of protrusions is varied by changing the protrusion initiation rate  $r_{\text{prot}}$  at 462  
each cell particle ranging from  $1 \times 10^{-5} \text{ s}^{-1}$  to  $1 \times 10^{-4} \text{ s}^{-1}$ . With 235 particles per cell, it 463  
follows that an attempt of protrusion initiation is made at on average every 42.5 – 425 s. 464  
However, as a protrusion can be initiated only when the particle is at the front of the 465  
polarized cell and if there are enough cell boundary particles available that are not 466  
already part of a protrusion, the effective protrusion formation rate is lower. The 467  
average total number of protrusions in 6 hours of migration ranges from 8 to 15 468  
protrusions for the range of protrusion initiation rate values (see Fig 7). However, the 469  
average absolute migration velocity is not affected by the protrusion initiation rate (see 470  
Fig 7). Moreover, no significant correlation is observed between absolute migration 471

velocity and total number of protrusions (see S2 Figure). The reason for this is that the  
increase in protrusion number results in an increase in time during which multiple  
protrusions are competing with and stabilize each other. This can be seen from the fact  
that the protrusion lifetime is unaffected by or even slightly increased with an increase  
in total number of protrusions (no significant correlation). An increase in protrusion  
strength in the previous simulation sets resulted in a larger number of protrusions  
because protrusions shortened faster by pulling the cell body in the adhesion direction.  
Therefore, these protrusions lived shorter as the adhesion force decreased faster, which  
thus resulted in more effective migration.

Second, the average protrusion lifetime is varied by changing the adhesion  
disassembly rate at normal load  $r_{\text{off,min}}$  ranging from  $1.85 \times 10^{-4} \text{ s}^{-1}$  to  $16.67 \times 10^{-4} \text{ s}^{-1}$ .  
These values are selected such that the expected average lifetimes at normal load in the  
different simulations are 10, 20, 40, 60 and 90 minutes. It can be observed that the  
average protrusion lifetime decreases with an increase in  $r_{\text{off,min}}$ . As a result, the  
average total number of protrusions during 6 hours of cell migration increases. However,  
as was seen for protrusion initiation rate, the average absolute migration velocity is not  
affected by the adhesion disassembly rate at normal force (see Fig 7) and there is no  
significant correlation between absolute migration velocity and average protrusion  
lifetime (see S2 Figure). The reason for this is that a reduction in protrusion lifetime  
also reduces the protrusion contraction efficiency. Adhesions disassemble earlier and  
thus protrusions pull the cell body less far in the adhesion direction. In contrast, for  
scenarios that are accompanied by an increase in cell strength protrusions live shorter  
because adhesion force decreases faster when the cell body is pulled in the adhesion  
direction. Therefore, cell body displacement by a single protrusion remains the same  
despite a shorter protrusion lifetime and an increase in total number of protrusion can  
therefore result in more migration.

Finally, the protrusion length is varied by changing the protrusion growth time  $T_{\text{prot}}$   
ranging from 200 – 600 s. It can be observed that an increase in protrusion growth time  
results in an increase in average protrusion length (see Fig 7). The protrusion length  
does not double if the protrusion growth time is doubled because the protrusion tip  
becomes thinner and thus provides less membrane area for the polymerizing actin to  
push against as the protrusion grows. An increase in average protrusion length does not

affect the average absolute migration velocity (see Fig 7 and S2 Figure). It can be seen that an increase in protrusion length is accompanied by a slight decrease in average total number of protrusions and a slight increase in the average protrusion lifetime (see S2 Figure). This can be explained by the fact that for a longer protrusion it takes more time to form the protrusion and pull the cell body in the adhesion direction. So an increase in protrusion length can result in more cell body displacement per protrusion, but due to the lower total number of protrusions the cell does not migrate further. Besides, the increase in protrusion lifetime also increases the time during which multiple protrusions compete with and stabilize each other, which can also slow down migration.

The results described above illustrate that ECM stiffness and cell strength are important regulators of cell migration. Strong cells on the one hand can pull themselves quickly in an adhesion direction and can therefore migrate by making many short living protrusions. Weaker cells on the other hand need more time to pull themselves in an adhesion direction and therefore migrate by making less and more long-living protrusions. At high adhesion force, even though the average protrusion lifetime equals 60 minutes ( $\frac{1}{r_{\text{off},\text{min}}}$ ), due to the exponential lifetime probability density function (see Eq 8) the majority of protrusions will live shorter than the average lifetime while only a few protrusions might live (much) longer. This large stochastic variability in protrusion lifetime can explain the increase in absolute migration velocity for stronger cells as protrusions of stronger cells contract faster and thus a larger percentage of protrusions will have completely pulled the cell towards the adhesion at the time of disassembly. This can be seen from the distribution of the relative contractile force at the time of adhesion disassembly ( $f_{\text{adh,rel}}$ ), which is calculated as the adhesion force at disassembly divided by the contractile force after maturation:

$$f_{\text{adh,rel}} = \frac{\|\mathbf{F}^{\text{adh}}\|}{f_{\text{mat}}F_{\text{am}}}. \quad (9)$$

This ratio is an indirect indicator of protrusion efficiency, which is the amount of cell body displacement per protrusion, as its value decreases only when the protrusion shortens and the cell body is pulled towards the adhesion. An increase in ECM stiffness results in a higher percentage of adhesions that disassemble at low  $f_{\text{adh,rel}}$  and thus more protrusions have pulled the cell in the adhesion direction by the time their

adhesion disassembles, therefore making them more effective (see Fig 8A, left). 533

**Fig 8. Simulation results for cell migration with force-dependent and force-independent adhesion disassembly.** Simulation results for force-dependent ( $\zeta_{\text{diss}} = 2 \times 10^4$  and  $\zeta_{\text{diss}} = 8 \times 10^4$ , see Eq 7) and force-independent adhesion disassembly rate. (A) Distribution of relative force ( $f_{\text{adh,rel}}$ ) at adhesion disassembly as function of ECM stiffness ( $E_{\text{ECM}}$ ). (B – D) Comparison of box plots of average absolute cell migration velocity ( $v_{\text{migr,abs}}$ ), total number of protrusions ( $\#prot$ ) and protrusion lifetime ( $\tau_{\text{prot}}$ ) as function of force-dependent and force-independent adhesion disassembly. Statistical significance: \*  $p < 0.05$ , \*\*  $p < 0.01$ , \*\*\*  $p < 0.005$ . Outliers shown in gray.

$r_{\text{off}}$  is implemented with a low rate for high adhesion force and a high rate for low adhesion force (See Fig 4A). In this way adhesions of protrusions that start contracting are less likely to disassemble than adhesions of protrusions that have already shortened and pulled the cell body towards the adhesion. In order to investigate the effect of this force-dependent disassembly rate two additional simulation sets are performed. In a first set  $\zeta_{\text{diss}}$ , the parameter that regulates the range of forces at which adhesions are stabilized (see Eq 7), is increased to  $8 \times 10^4$  to increase this stabilization range (see Fig 4). It can be seen in Fig 8A (center) that a larger percentage of adhesions disassemble at low relative adhesion force for all ECM stiffnesses. This results in a significant decrease in total number of protrusions and increase in protrusion lifetime for an ECM stiffness of 200 Pa and higher, but not in a significant change in average absolute migration velocity. Therefore, the increase in adhesion lifetime for a larger adhesion force range does not increase cell migration velocity, but makes migration more efficient by reducing the total number of protrusions and increasing the cell displacement per protrusion contraction, which is expected to be energetically favorable. 534 535 536 537 538 539 540 541 542 543 544 545 546 547 548

In a second set a force-independent adhesion disassembly rate ( $r_{\text{off}}$ ) with a value of  $5.56 \times 10^{-4} \text{ s}^{-1}$  is prescribed, which gives an average adhesion lifetime of 30 minutes. This results in an increase in disassembly rate at high adhesion force and a decrease in disassembly rate at low adhesion force compared to a force-dependent rate with a value for  $\zeta_{\text{diss}}$  of  $2 \times 10^4$  or  $8 \times 10^4$ . Compared to simulations with  $\zeta_{\text{diss}} = 2 \times 10^4$  the number of protrusions that disassemble at  $f_{\text{adh,rel}} < 0.4$  is reduced for cells in a low stiffness ECM (see Fig 8A, right) and thus a lower percentage of protrusions effectively displace the cell body. For high ECM stiffness the number of protrusions that disassemble at  $f_{\text{adh,rel}} < 0.2$  is increased, which means that these protrusions have pulled the cell body 549 550 551 552 553 554 555 556 557



in the adhesion direction. However, since the adhesion disassembly rate does not  
increase after the adhesion force has decreased, some of these protrusions might also  
exist for too long as their adhesions do not disassemble directly after pulling the cell  
body in the adhesion direction. When both simulations with  $\zeta_{\text{diss}} = 2 \times 10^4$  and  
 $\zeta_{\text{diss}} = 8 \times 10^4$  are compared to simulations with force-independent adhesion disassembly  
rate no significant differences in average absolute migration velocity are observed for all  
ECM stiffnesses (see Fig 8C and Fig 8D). However, for  $\zeta_{\text{diss}} = 2 \times 10^4$  the average total  
number of protrusions is lower and the average protrusion lifetime is higher for 50 and  
100 Pa ECM stiffness, while the inverse is observed for 300 Pa ECM stiffness. For  
 $\zeta_{\text{diss}} = 8 \times 10^4$  the average total number of protrusions is lower for 50, 100, 200 and 400  
Pa and the average protrusion lifetime is higher for 50, 100 and 200 Pa.

In summary, changes in ECM stiffness and cell strength affect cell migration and are  
accompanied by changes in protrusion dynamics, in particular protrusion number and  
lifetime. Targeting and thereby changing protrusion dynamics does not affect cell  
migration. Results show that a force-dependent adhesion disassembly rate does not  
increase cell migration velocity. Therefore, the model suggests that a stochastic  
variability in protrusion lifetime (exponential adhesion lifetime probability density  
function, see Eq 8) is already enough to optimize migration for cells in ECMs with  
various stiffnesses. Instead of affecting the migration velocity, a force-dependent  
adhesion disassembly rate reduces the number of protrusions required to obtain a  
similar migration velocity and therefore makes migration more efficient.

## Optimal number of simultaneous protrusions depends on ECM anisotropy

Fraley *et al.* revealed that focal adhesion proteins can modulate cell migration through  
a 3D matrix by regulating protrusion dynamics [23]. Effective cell migration could be  
assured by establishing a low number of protrusions. They hypothesized that the  
optimal number of major protrusions at a time should lie between zero, for which cells  
would not be able to move, and not more than two, above which cells would not be able  
to move persistently as protrusions would pull in too many directions simultaneously. In  
order to test if an optimal number of protrusions exists for effective cell migration,

simulations are performed in which the formation of 1, 2, 3 or 4 simultaneous protrusions is enforced. At every time step a cell particle is selected to initiate a new protrusion. This protrusion is allowed to form only if the number of existing protrusions is lower than the prescribed number of protrusions  $n_{\text{prot}}$ . Cell particles at the rear can be selected in order to permit formation of 3 or 4 protrusions. However, they are selected with a 100 times lower rate than particles at the front in order to preserve cell polarity. In order to prevent excessive cell area growth, protrusions can be initiated only if the cell area is smaller than or equal to twice the initial cell area. Besides, the protrusion force is scaled by the current cell area  $A_{\text{cell}}$  over the initial cell area  $A_{0,\text{cell}}$ , mimicking the reduction in available actin when the cell increases in size:

$$\|\mathbf{F}^{\text{prot}}\| = F_{\text{prot}} \frac{A_{\text{cell}}}{A_{0,\text{cell}}} \quad \text{for } A_{\text{cell}} \geq A_{0,\text{cell}} \quad (10)$$

First, cells are placed in a homogeneous viscoelastic ECM with Young's modulus  $E = 200$  Pa and are allowed to migrate for 6 hours. Final cell shapes, cell migration paths and results of cell migration analysis are shown in Fig 9. It can be observed that the average absolute migration velocity ( $v_{\text{migr,abs}}$ , cell position after 6 hours minus initial cell position, divided by 6 hours) decreases with increase in number of simultaneous protrusions, with  $12.1 \mu\text{m/hr}$  for cells with one protrusion and  $3.7 \mu\text{m/hr}$  for cells with 4 protrusions. At the same time, cells with only one protrusion clearly form the least total number of protrusion during 6 hours of migration, indicating that the formation of multiple protrusions strongly reduces absolute migration velocity. The total number of protrusions in 6 hours increases with the prescribed number of simultaneous protrusions, which shows that inhibition of protrusion initiation at large cell area does not prevent cell migration. Migration along the cell path is highest for a cell with 3 protrusions, with an average migration velocity along the cell path ( $v_{\text{migr,path}}$ , total path length divided by 6 hours) of  $26.6 \mu\text{m/hr}$ , and lowest for cells with either 1 or 4 protrusions, for which the velocity along the cell path is around  $22 \mu\text{m/hr}$ . The cell displacement generated per protrusion is clearly highest for 1 simultaneous protrusion, which is expected as multiple protrusions can counteract each other and thereby prevent cell body displacement. These results together indicate that cells with less protrusions migrate more direct and efficient (higher cell body displacement per protrusion) as can

be seen from both the cell migration paths (straighter paths) and the mean squared displacements (MSDs) as function of time (steeper slope). The slope of the MSD of cells with 4 protrusion is close to 1, which represents a random walk, while the higher slope for cells with less protrusions indicates that they follow a straighter path.

**Fig 9. Simulation results for cell migration through an isotropic viscoelastic ECM (without any nonlinear elastic springs).** Results for cells with 1 (blue, n=17), 2 (red, n=17), 3 (yellow, n=17) or 4 (magenta, n=17) simultaneous protrusions. (A) Cell shapes after 6 hours of migration. The black circle indicates the ECM boundary with a radius of 150  $\mu\text{m}$ . (B) Cell paths representing the cell center of mass displacement during 6 hours. (C) Absolute cell migration velocity ( $v_{\text{migr,abs}}$ , cell position after 6 hours minus initial cell position, divided by 6 hours) and migration velocity along cell path ( $v_{\text{migr,path}}$ , total path length divided by 6 hours). (D) Total number of protrusions ( $\#prot$ ) and mean squared displacement (MSD) as function of time lag (log-log plot), where  $\alpha = 1$  represents the slope of the MSD for a random walk. Statistical significance: \*  $p < 0.05$ , \*\*  $p < 0.01$ , \*\*\*  $p < 0.005$ . Outliers shown in gray.

Next, cells are placed in an anisotropic, uniaxial fibrillar ECM (with nonlinear elastic springs in one direction and a lower Young's modulus of 10 Pa for the nonfibrillar ECM component, see Fig 2) in order to investigate the effect of the number of simultaneous protrusions on cell migration through an anisotropic fibrillar ECM. Final cell shapes, cell migration paths and results of cell migration analysis are shown in Fig 10. It can be seen from the migration paths that cells migrate preferentially along the fiber direction. Since no preferential protrusion growth direction due to *e.g.* contact guidance is implemented, this demonstrates that mechanosensing by protrusions is enough to guide cell migration. Further, it can also be observed that cells with one protrusion do not migrate further in 6 hours than cells with 2 protrusions, which now have the highest average absolute migration velocity of 10.7  $\mu\text{m/hr}$  (although not significantly different from cells with one protrusion), and only slightly (but significantly) further than cells with 3 or 4 protrusions. Cells with one protrusion are also significantly slower along their cell path (14.6  $\mu\text{m/hr}$ ) than cells with multiple protrusions, with the highest average migration along the cell path of 21.2  $\mu\text{m/hr}$  for cells with 2 protrusions. Compared to migration in a homogeneous viscoelastic ECM, the average total number of protrusions in 6 hours for cells with one protrusion has dropped from 9.9 to 5.6. This happens because protrusions that try to protrude in a direction that is not aligned with the fiber (spring) direction sense a very weak ECM and do not mature much. As a result these protrusions are weaker and take longer to shorten and pull the cell body

towards the corresponding adhesion. Therefore, it takes longer for the adhesion force to decrease and for the adhesion disassembly rate to increase, which explains the higher average protrusion lifetime. Cells with multiple protrusions are more likely to form at least one protrusion in the fiber direction that will mature more and become stronger, allowing it to rupture the adhesions of neighboring weaker and thus slower contracting protrusions. This results in a more efficient way of migration in which strong protrusions rapidly displace the cell body while weaker protrusions are quickly retracted due to adhesion rupturing. Therefore, migration has become more directed and faster for cells with multiple protrusions for migration in an anisotropic, uniaxial fibrillar ECM compared to a homogeneous ECM. This can also be observed from an increase in the slope of the MSD in Fig 10D compared to Fig 9D. An example of how this competition between protrusions can result in migration along the fiber direction is shown in Fig 11 for a cell with 2 simultaneous protrusions.

**Fig 10. Simulation results for cell migration through an anisotropic, uniaxial fibrillar ECM (nonlinear elastic springs in horizontal direction).** Results for cells with 1 (blue, n=17), 2 (red, n=17), 3 (yellow, n=17) or 4 (magenta, n=19) simultaneous protrusions. (A) Cell shapes after 6 hours of migration. The black circle indicates the ECM boundary with a radius of 150  $\mu\text{m}$ . (B) Cell paths representing the cell center of mass displacement during 6 hours. (C) Absolute cell migration velocity ( $v_{\text{migr,abs}}$ , cell position after 6 hours minus initial cell position, divided by 6 hours) and migration velocity along cell path ( $v_{\text{migr,path}}$ , total path length divided by 6 hours). (D) Total number of protrusions ( $\#prot$ ) and mean squared displacement (MSD) as function of time lag (log-log plot), where  $\alpha = 1$  represents the slope of the MSD for a random walk. Statistical significance: \*  $p < 0.05$ , \*\*  $p < 0.01$ , \*\*\*  $p < 0.005$ . Outliers shown in gray.

**Fig 11. Competition between protrusions for 3D migration through an anisotropic, uniaxial fibrillar ECM for a cell with 2 simultaneous protrusions.** The cell is polarized, with the front colored in turquoise and the rear in blue. The solid ECM is represented by grey particles and the degraded ECM by black particles. Arrows represent the displacement in the solid ECM with respect to the initial particle positions. Protrusions formed in the direction perpendicular to the fiber direction are weaker (lower  $f_{\text{mat}}$ ) and therefore quickly retracted due to rupture of the corresponding adhesions, allowing the cell to polarize and migrate along the fiber direction.

Together, these results confirm the hypothesis of Fraley *et al.* that the number of protrusions should ideally lie between 0 and not more than 2 protrusions [23]. Migration is most efficient with one protrusion in a homogeneous ECM. In an anisotropic ECM with a preferred fiber direction, mechanosensing by multiple protrusions improves

migration efficiency, with most efficient migration for 2 simultaneous protrusions. More  
than 2 protrusions increases the probability of forming opposing protrusions that hinder  
cell body displacement.

## Discussion

In this paper a computational model was developed to investigate the role of actin  
protrusion dynamics and ECM properties on 3D cell migration. Cell migration was  
modeled with a hybrid approach combining an agent-based mechanical cell model and a  
meshless Lagrangian particle-based degradable viscoelastic ECM model. The cell model  
captures the main subcellular processes required for migration, *i.e.* membrane  
protrusion, cell-ECM adhesion, actomyosin contraction and ECM degradation. By  
probing the local ECM stiffness and applying a corresponding contractile force,  
migration is adapted to the ECM. The ECM model describes the mechanics of either an  
isotropic, viscoelastic ECM or an anisotropic, uniaxial fibrillar ECM.

First, it was shown that changes in ECM stiffness and cell strength affect cell  
migration and are accompanied by changes in number, lifetime and (only slightly)  
length of protrusions. Directly varying the parameter values that govern protrusion  
dynamics did not result in changes in cell migration. As a force-dependent adhesion  
lifetime did not affect cell migration velocity, the model suggested that a stochastic  
variability in adhesion lifetime was already enough to optimize migration of cells in  
ECMs with different stiffnesses. Instead of affecting the migration velocity, a  
force-dependent adhesion disassembly rate reduced the number of protrusions required  
to obtain a similar migration velocity and therefore made migration more efficient.  
Second, the hypothesis of Fraley *et al.* that the optimal number of simultaneous  
protrusions should lie between 0 and 2 was confirmed and further refined [23]. The  
formation of maximal 1 protrusion proved to be most efficient for migration in a  
homogeneous ECM. For cells in an anisotropic ECM with preferred fiber direction the  
formation of 2 protrusions proved to be most efficient as competition between  
mechanosensing protrusions was required for orienting the cell front.

Our current understanding of the role and regulation of protrusion dynamics for 3D  
cell migration is limited. Fraley *et al.* discovered that 3D cell migration speed (along

the cell path) is correlated mainly to the number of protrusions per time, while  
protrusion lifetime and length are not significantly correlated to migration speed. In our  
model, varying protrusion number, lifetime and length did not affect both the average  
absolute migration velocity and average migration velocity along the cell path. However,  
a change in migration as a result of a change in cell strength was accompanied by  
changes in protrusion number, lifetime and length. At the same time, no difference in  
migration velocity was observed for cells with both force-dependent and  
force-independent adhesion disassembly, while protrusion number and lifetime were  
significantly affected. Our simulation results demonstrate the complex interplay  
between cell migration and protrusion dynamics, and the fact that correlations between  
protrusion features (such as number and lifetime) and cell migration velocity do not  
necessarily imply a causal relation. Altogether, our results show that cell migration  
speed in our model is regulated mainly by cell strength and ECM stiffness (due to  
mechanosensing), while force-dependent adhesion disassembly is required to optimize  
migration efficiency (cell body displacement per protrusion), which is expected to be  
energetically favorable. While our computational model enables to isolate (perturb)  
specific subcellular processes and assess their direct effect on cell migration (without  
perturbing other processes), it is very difficult to almost impossible to do that in an  
experiment, which demonstrates the added value of the model.

While the model captures the main features of 3D cell migration, some processes  
were simplified or neglected. First, protrusion initiation and growth are modeled  
independent of the surrounding ECM and cell mechanics. Fischer *et al.* revealed that  
pseudopodial branching of endothelial cells is inhibited by ECM stiffness and myosin II  
activity and that local depletion of myosin II precedes branch formation [24]. They also  
showed that this regulation of branch formation by myosin II contraction results in  
more directed and faster cell migration. Elliott *et al.* discovered that myosin II  
contractility minimizes cellular branching by minimizing the local curvature of the cell  
surface [26]. They hypothesized that this could favor the formation of protrusions along  
the elongation direction of a cell over protrusions oriented perpendicular to the  
elongation direction, thereby increasing persistence of migration direction. Cells are also  
known to use filopodia to sense local chemical and mechanical cues, which allows them  
to regulate the formation of protrusions and direct cell migration [33]. Although

protrusion initiation in our model is not regulated by local myosin II contraction, ECM stiffness or chemical cues, the formation of an excessive number of protrusions is prevented by allowing protrusions to form only at the front of the cell. In most simulations this limits the number of protrusions that can exist at the same time to 3 protrusions. When the cell was allowed to form protrusions also at the rear in order to obtain 4 simultaneous protrusions, the migration velocity decreased and migration was less directed. This shows that the formation of an excessive number of protrusions hinders cell migration because the protrusions pull in opposing directions, which is prevented by allowing protrusion to form only at the cell front.

Next, cells are known to use the local ECM fiber orientation to guide protrusion growth and therefore enhance migration efficiency by increasing directional persistence [34–36]. The model presented here did not implement contact guidance by fibers as protrusion growth was not made dependent on collagen fiber direction (which was captured by springs between ECM particles). Although such implementation might result in even more directed cell migration, the results here indicate that contact guidance is not necessary for a cell in order to follow a preferred collagen fiber direction. Competition between multiple protrusions that probe the stiffness of the local ECM in multiple directions and, through actomyosin contraction, rupture the adhesions of weak protrusions (namely those protrusions that form in softer ECM directions) is enough to explain directed cell migration.

Ehrbar *et al.* showed that 3D cell migration in a PEG hydrogel is reduced by an increase in gel stiffness [37], which is opposite to our observation that cell migration increases with ECM stiffness. An explanation for this is that an increase in PEG gel stiffness is accompanied by an increase in cross-linking density which hinders cell migration. In order to migrate through a densely cross-linked gel more ECM degradation is required. In our model ECM degradation in front of a growing protrusion is fast in order to allow protrusions to form. Degradation of ECM particles close to the cell body is slower, but still quick compared to a real hydrogel, as slow or no degradation occasionally resulted in numerical instabilities when a solid ECM particle was pushed through the cell boundary. Therefore, the cell model experiences less hindrance from the ECM than what might occur in reality and migration velocity is determined mainly by contractile strength of the cell, which increases with ECM

stiffness (due to the mechanotransduction mechanism depicted in Fig 3F). Mason *et al.* 752  
developed a method to tune the stiffness of a collagen scaffold without changing the 753  
collagen density and observed an increase in endothelial cell spreading and outgrowth 754  
with an increase in collagen stiffness, which is in agreement with our observations [38]. 755  
The limited hindrance of cell migration by the ECM in our model, compared to 756  
experiments, can also be derived from the differences in simulated versus experimentally 757  
observed cell paths. Wu *et al.* demonstrated that an anisotropic persistent random walk 758  
model is required to describe experimentally observed 3D cell migration, where the 759  
anisotropic part captures the preferential reorientation of cells in microchannels created 760  
by ECM degradation [39]. In our model, deflection of protrusion growth based on the 761  
local ECM (as described in S4 Text) increases the likeliness of protrusion growth into 762  
already degraded ECM areas, favoring to some extent these directions for cell migration. 763  
At the same time, as in our model protrusion initiation does not depend on the local 764  
ECM density, cell migration is not restricted to existing microchannels in the ECM. 765

In conclusion, we have proposed a new computational model of 3D cell migration 766  
that captures the mechanics and dynamics underlying cell migration. To the best of our 767  
knowledge, this is the first model that combines a mechanical deformable cell model, 768  
which migrates by extending and contracting protrusions that probe the local ECM 769  
stiffness, with a deformable and degradable ECM model. By investigating the effect of 770  
protrusion dynamics, cell strength and ECM mechanics we have demonstrated that this 771  
model is able to provide new insights in the role and regulation of protrusion dynamics 772  
in 3D cell migration and the way cell migration is adapted to the local ECM. Therefore, 773  
we believe that this model can be a valuable contribution to increase the understanding 774  
of 3D cell migration mechanisms. In the future, this model be could extended further by 775  
regulating the initiation and growth direction of protrusions based on sensing of 776  
mechanical and chemical cues by filopodia and chemical signaling pathways inside the 777  
cell. 778

## Supporting information 779

### S1 Text. Deformable cell model 780



**S2 Text.** SPH implementation of the ECM model 781

**S3 Text.** ECM degradation and cell-ECM boundary conditions 782

**S4 Text.** Protrusion deflection 783

**S5 Text.** Cortex curvature-dependent actomyosin contraction 784

**S1 Figure.** Cell polarization 785

**S2 Figure.** Simulation readout correlation 786

**S1 Video.** ECM Displacement field for cell migration through ECM with stiffness of 100 Pa 787  
788

**S2 Video.** ECM Von Mises stress distribution for cell migration through ECM with stiffness of 100 Pa 789  
790

**S3 Video.** ECM Displacement field for cell migration through ECM with stiffness of 400 Pa 791  
792

**S4 Video.** ECM Von Mises stress distribution for cell migration through ECM with stiffness of 400 Pa 793  
794

## **Acknowledgments** 795

The authors thank Simon Vanmaercke and Tim Odenthal for technical support in 796  
designing the computational algorithms for the numerical simulations. This work 797  
utilized the high-performance computing resources of the Vlaams Supercomputer 798  
Centrum in Flanders, Belgium (<https://www.vscentrum.be/>). 799

## References

1. Bear JE, Haugh JM. Directed migration of mesenchymal cells: where signaling and the cytoskeleton meet. *Current opinion in Cell Biology*. 2014;30:74–82. doi:10.1016/j.pain.2013.06.005.Re-Thinking.
2. Ladoux B, Nicolas A. Physically based principles of cell adhesion mechanosensitivity in tissues. *Reports on Progress in Physics*. 2012;75(11). doi:10.1088/0034-4885/75/11/116601.
3. Mierke CT. Physical view on migration modes. *Cell Adhesion and Migration*. 2015;9(5):367–379. doi:10.1080/19336918.2015.1066958.
4. Paluch EK, Raz E. The role and regulation of blebs in cell migration. *Current Opinion in Cell Biology*. 2013;25(5):582–590. doi:10.1016/j.ceb.2013.05.005.
5. Martins GG, Kolega J. Endothelial cell protrusion and migration in three-dimensional collagen matrices. *Cell Motility and the Cytoskeleton*. 2006;63(2):101–115. doi:10.1002/cm.20104.
6. Doyle AD, Carvajal N, Jin A, Matsumoto K, Yamada KM. Local 3D matrix microenvironment regulates cell migration through spatiotemporal dynamics of contractility-dependent adhesions. *Nature Communications*. 2015;6:8720. doi:10.1038/ncomms9720.
7. Caswell PT, Zech T. Actin-Based Cell Protrusion in a 3D Matrix. *Trends in Cell Biology*. 2018;28(10):823–834. doi:10.1016/j.tcb.2018.06.003.
8. Wolfenson H, Meacci G, Liu S, Stachowiak MR, Iskratsch T, Ghassemi S, et al. Tropomyosin controls sarcomere-like contractions for rigidity sensing and suppressing growth on soft matrices. *Nature Cell Biology*. 2016;18(1):33–42. doi:10.1038/ncb3277.
9. Del Rio A, Perez-jimenez R, Liu R, Roca-cusachs P, Julio M, Sheetz MP. Stretching Single Talin Rod. *Science*. 2009;323(5914):638–641. doi:10.1126/science.1162912.

10. Saez A, Buguin A, Silberzan P, Ladoux B. Is the mechanical activity of epithelial cells controlled by deformations or forces? *Biophysical Journal*. 2005;89(6):52–54. doi:10.1529/biophysj.105.071217.
11. Kim MC, Silberberg YR, Abeyaratne R, Kamm RD, Asada HH. Computational modeling of three-dimensional ECM-rigidity sensing to guide directed cell migration. *Proceedings of the National Academy of Sciences*. 2018;115(3):E390–E399. doi:10.1073/pnas.1717230115.
12. Moure A, Gomez H. Computational model for amoeboid motion: Coupling membrane and cytosol dynamics. *Physical Review E*. 2016;94:042423. doi:10.1103/PhysRevE.94.042423.
13. Moure A, Gomez H. Phase-field model of cellular migration: Three-dimensional simulations in fibrous networks. *Computer Methods in Applied Mechanics and Engineering*. 2017;320:162–197. doi:10.1016/j.cma.2017.03.025.
14. Moure A, Gomez H. Three-dimensional simulation of obstacle-mediated chemotaxis. *Biomechanics and Modeling in Mechanobiology*. 2018;17(5):1243–1268. doi:10.1007/s10237-018-1023-x.
15. Zhu J, Mogilner A. Comparison of cell migration mechanical strategies in three-dimensional matrices: a computational study. *Interface focus*. 2016;6(5):20160040. doi:10.1098/rsfs.2016.0040.
16. Ribeiro FO, Gómez-Benito MJ, Folgado J, Fernandes PR, García-Aznar JM. Computational model of mesenchymal migration in 3D under chemotaxis. *Computer Methods in Biomechanics and Biomedical Engineering*. 2017;20(1):59–74. doi:10.1080/10255842.2016.1198784.
17. Merino-Casallo F, Gomez-Benito MJ, Juste-Lanas Y, Martinez-Cantin R, Garcia-Aznar JM. Integration of in vitro and in silico Models Using Bayesian Optimization With an Application to Stochastic Modeling of Mesenchymal 3D Cell Migration. *Frontiers in Physiology*. 2018;9(September):1–17. doi:10.3389/fphys.2018.01246.

18. Odenthal T, Smeets B, Van Liedekerke P, Tijskens E, Van Oosterwyck H, Ramon H. Analysis of Initial Cell Spreading Using Mechanistic Contact Formulations for a Deformable Cell Model. *PLoS Computational Biology*. 2013;9(10):e1003267. doi:10.1371/journal.pcbi.1003267.
19. Van Liedekerke P, Neitsch J, Johann T, Warmt E, Grosser S, Valverde IG, et al. Quantifying the mechanics and growth of cells and tissues in 3D using high resolution computational models. *bioRxiv*. 2019; p. 470559. doi:10.1101/470559.
20. Heck T, Smeets B, Vanmaercke S, Bhattacharya P, Odenthal T, Ramon H, et al. Modeling extracellular matrix viscoelasticity using smoothed particle hydrodynamics with improved boundary treatment. *Computer Methods in Applied Mechanics and Engineering*. 2017;322:515–540. doi:10.1016/j.cma.2017.04.031.
21. Hieber SE, Koumoutsakos P. A Lagrangian particle method for the simulation of linear and nonlinear elastic models of soft tissue. *Journal of Computational Physics*. 2008;227:9195–9215. doi:10.1016/j.jcp.2008.05.016.
22. Borau C, Kamm RD, García-Aznar JM. Mechano-sensing and cell migration: a 3D model approach. *Physical Biology*. 2011;8(6):066008. doi:10.1088/1478-3975/8/6/066008.
23. Fraley SI, Feng Y, Krishnamurthy R, Kim Dh, Celedon A, Longmore GD, et al. A distinctive role for focal adhesion proteins in three-dimensional cell motility. *Nature Cell Biology*. 2010;12(6):598–604. doi:10.1038/ncb2062.A.
24. Fischer RS, Gardel M, Ma X, Adelstein RS, Waterman CM. Local cortical tension by myosin II guides 3D endothelial cell branching. *Current biology*. 2009;19(3):260–265. doi:10.1016/j.cub.2008.12.045.
25. Stricker J, Beckham Y, Davidson MW, Gardel ML. Myosin II-Mediated Focal Adhesion Maturation Is Tension Insensitive. *PLoS ONE*. 2013;8(7):e70652. doi:10.1371/journal.pone.0070652.
26. Elliott H, Fischer RS, Myers KA, Desai RA, Gao L, Chen CS, et al. Myosin II controls cellular branching morphogenesis and migration in three dimensions by

- minimizing cell-surface curvature. *Nature Cell Biology*. 2015;17(2):137–147.  
doi:10.1038/ncb3092.
27. Wolf K, Wu YI, Liu Y, Geiger J, Tam E, Overall C, et al. Multi-step pericellular proteolysis controls the transition from individual to collective cancer cell invasion. *Nature Cell Biology*. 2007;9(8):893–904. doi:10.1038/ncb1616.
28. Wolf K, Lindert M, Krause M, Alexander S, Riet J, Willis AL, et al. Physical limits of cell migration: Control by ECM space and nuclear deformation and tuning by proteolysis and traction force. *The Journal of cell biology*. 2013;201(7):1069–1084. doi:10.1083/jcb.201210152.
29. Steinwachs J, Metzner C, Skodzek K, Lang N, Thievensen I, Mark C, et al. Three-dimensional force microscopy of cells in biopolymer networks. *Nature Methods*. 2016;13(2):171–176. doi:10.1038/nmeth.3685.
30. Wendland H. Piecewise polynomial, positive definite and compactly supported radial functions of minimal degree. *Advances in Computational Mathematics*. 1995;4(1):389–396.
31. Van Liedekerke P, Smeets B, Odenthal T, Tijskens E, Ramon H. Solving microscopic flow problems using Stokes equations in SPH. *Computer Physics Communications*. 2013;184(7):1686–1696. doi:10.1016/j.cpc.2013.02.013.
32. Ladoux B, Mège RM, Trepas X. Front-Rear Polarization by Mechanical Cues: From Single Cells to Tissues. *Trends in Cell Biology*. 2016;26(6):420–433. doi:10.1016/j.tcb.2016.02.002.
33. Mattila PK, Lappalainen P. Filopodia: Molecular architecture and cellular functions. *Nature Reviews Molecular Cell Biology*. 2008;9(6):446–454. doi:10.1038/nrm2406.
34. Riching KM, Cox BL, Salick MR, Pehlke C, Riching AS, Ponik SM, et al. 3D Collagen Alignment Limits Protrusions to Enhance Breast Cancer Cell Persistence. *Biophysical Journal*. 2014;107(11):2546–2558. doi:10.1016/j.bpj.2014.10.035.

35. Fraley SI, Wu Ph, He L, Feng Y, Krisnamurthy R, Longmore GD, et al. Three-dimensional matrix fiber alignment modulates cell migration and MT1-MMP utility by spatially and temporally directing protrusions. *Scientific Reports*. 2015;5(1):1–13. doi:10.1038/srep14580.
36. Carey SP, Goldblatt ZE, Martin KE, Romero B, Williams RM, Reinhart-King CA. Local extracellular matrix alignment directs cellular protrusion dynamics and migration through Rac1 and FAK. *Integrative Biology (United Kingdom)*. 2016;8(8):821–835. doi:10.1039/c6ib00030d.
37. Ehrbar M, Sala A, Lienemann P, Ranga A, Mosiewicz K, Bittermann A, et al. Elucidating the role of matrix stiffness in 3D cell migration and remodeling. *Biophysical Journal*. 2011;100(2):284–293. doi:10.1016/j.bpj.2010.11.082.
38. Mason BN, Alina Starchenko, Williams RM, Bonassar LJ, Reinhart-King CA. Tuning 3D Collagen Matrix Stiffness Independently of Collagen Concentration Modulates Endothelial Cell Behavior. *Acta Biomaterialia*. 2013;9(1):4635–4644. doi:10.1016/j.actbio.2012.08.007.Tuning.
39. Wu PH, Giri A, Sun SX, Wirtz D. Three-dimensional cell migration does not follow a random walk. *Proceedings of the National Academy of Sciences*. 2014;111(11):3949–3954. doi:10.1073/pnas.1318967111.

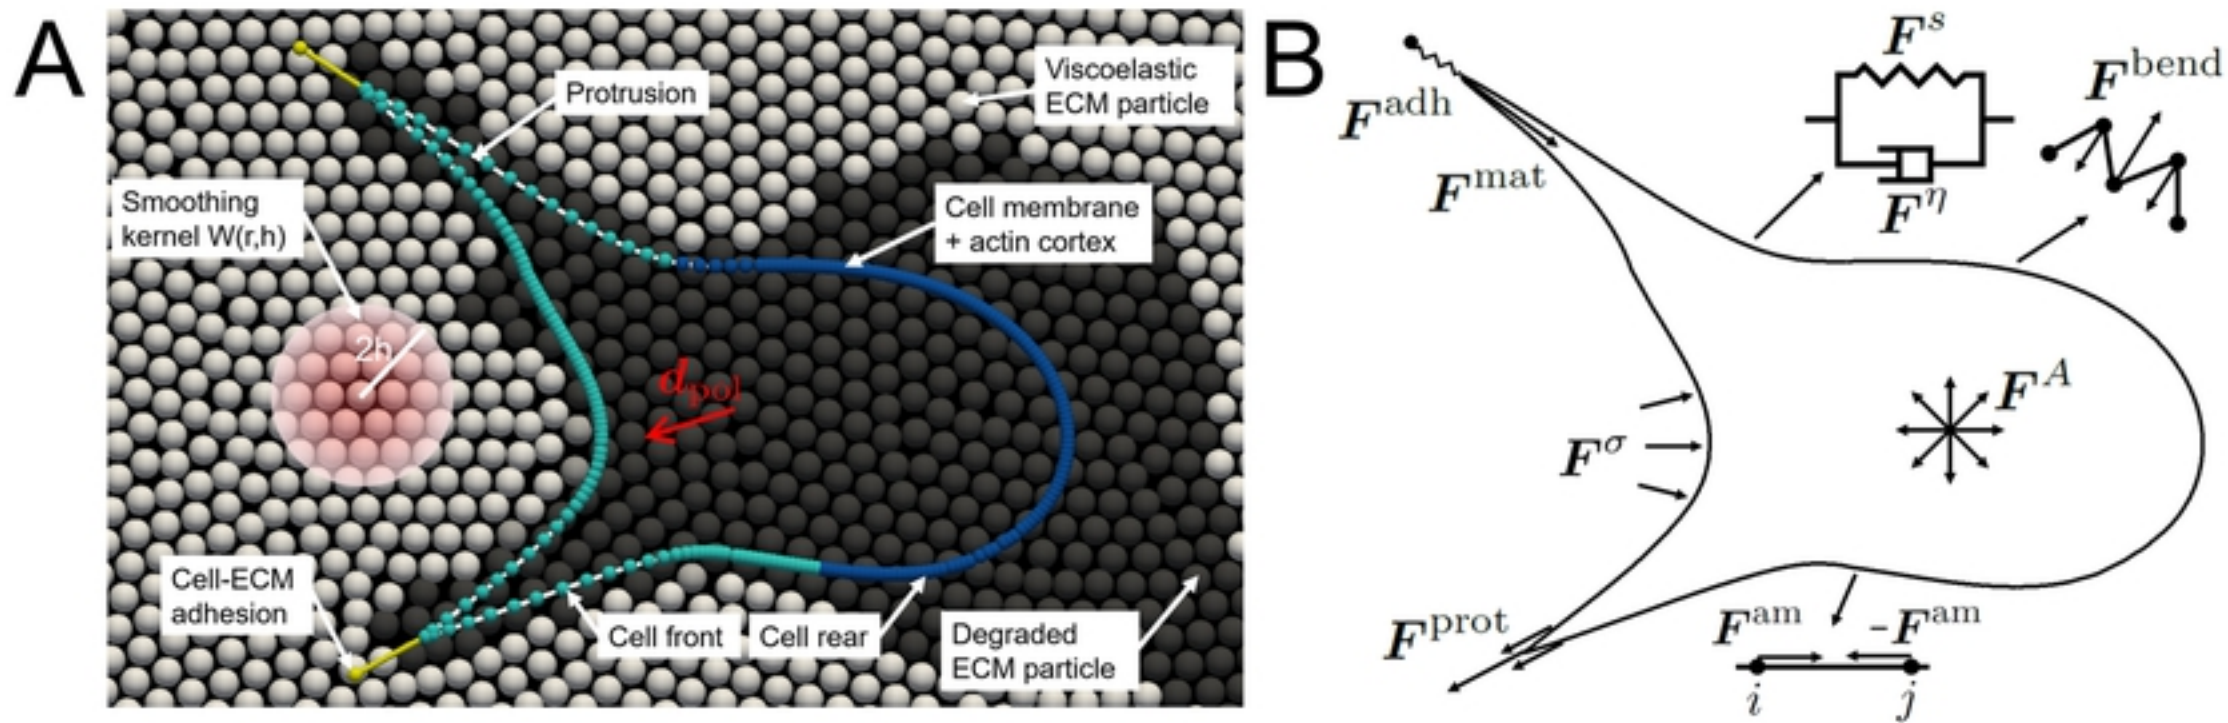

Fig1

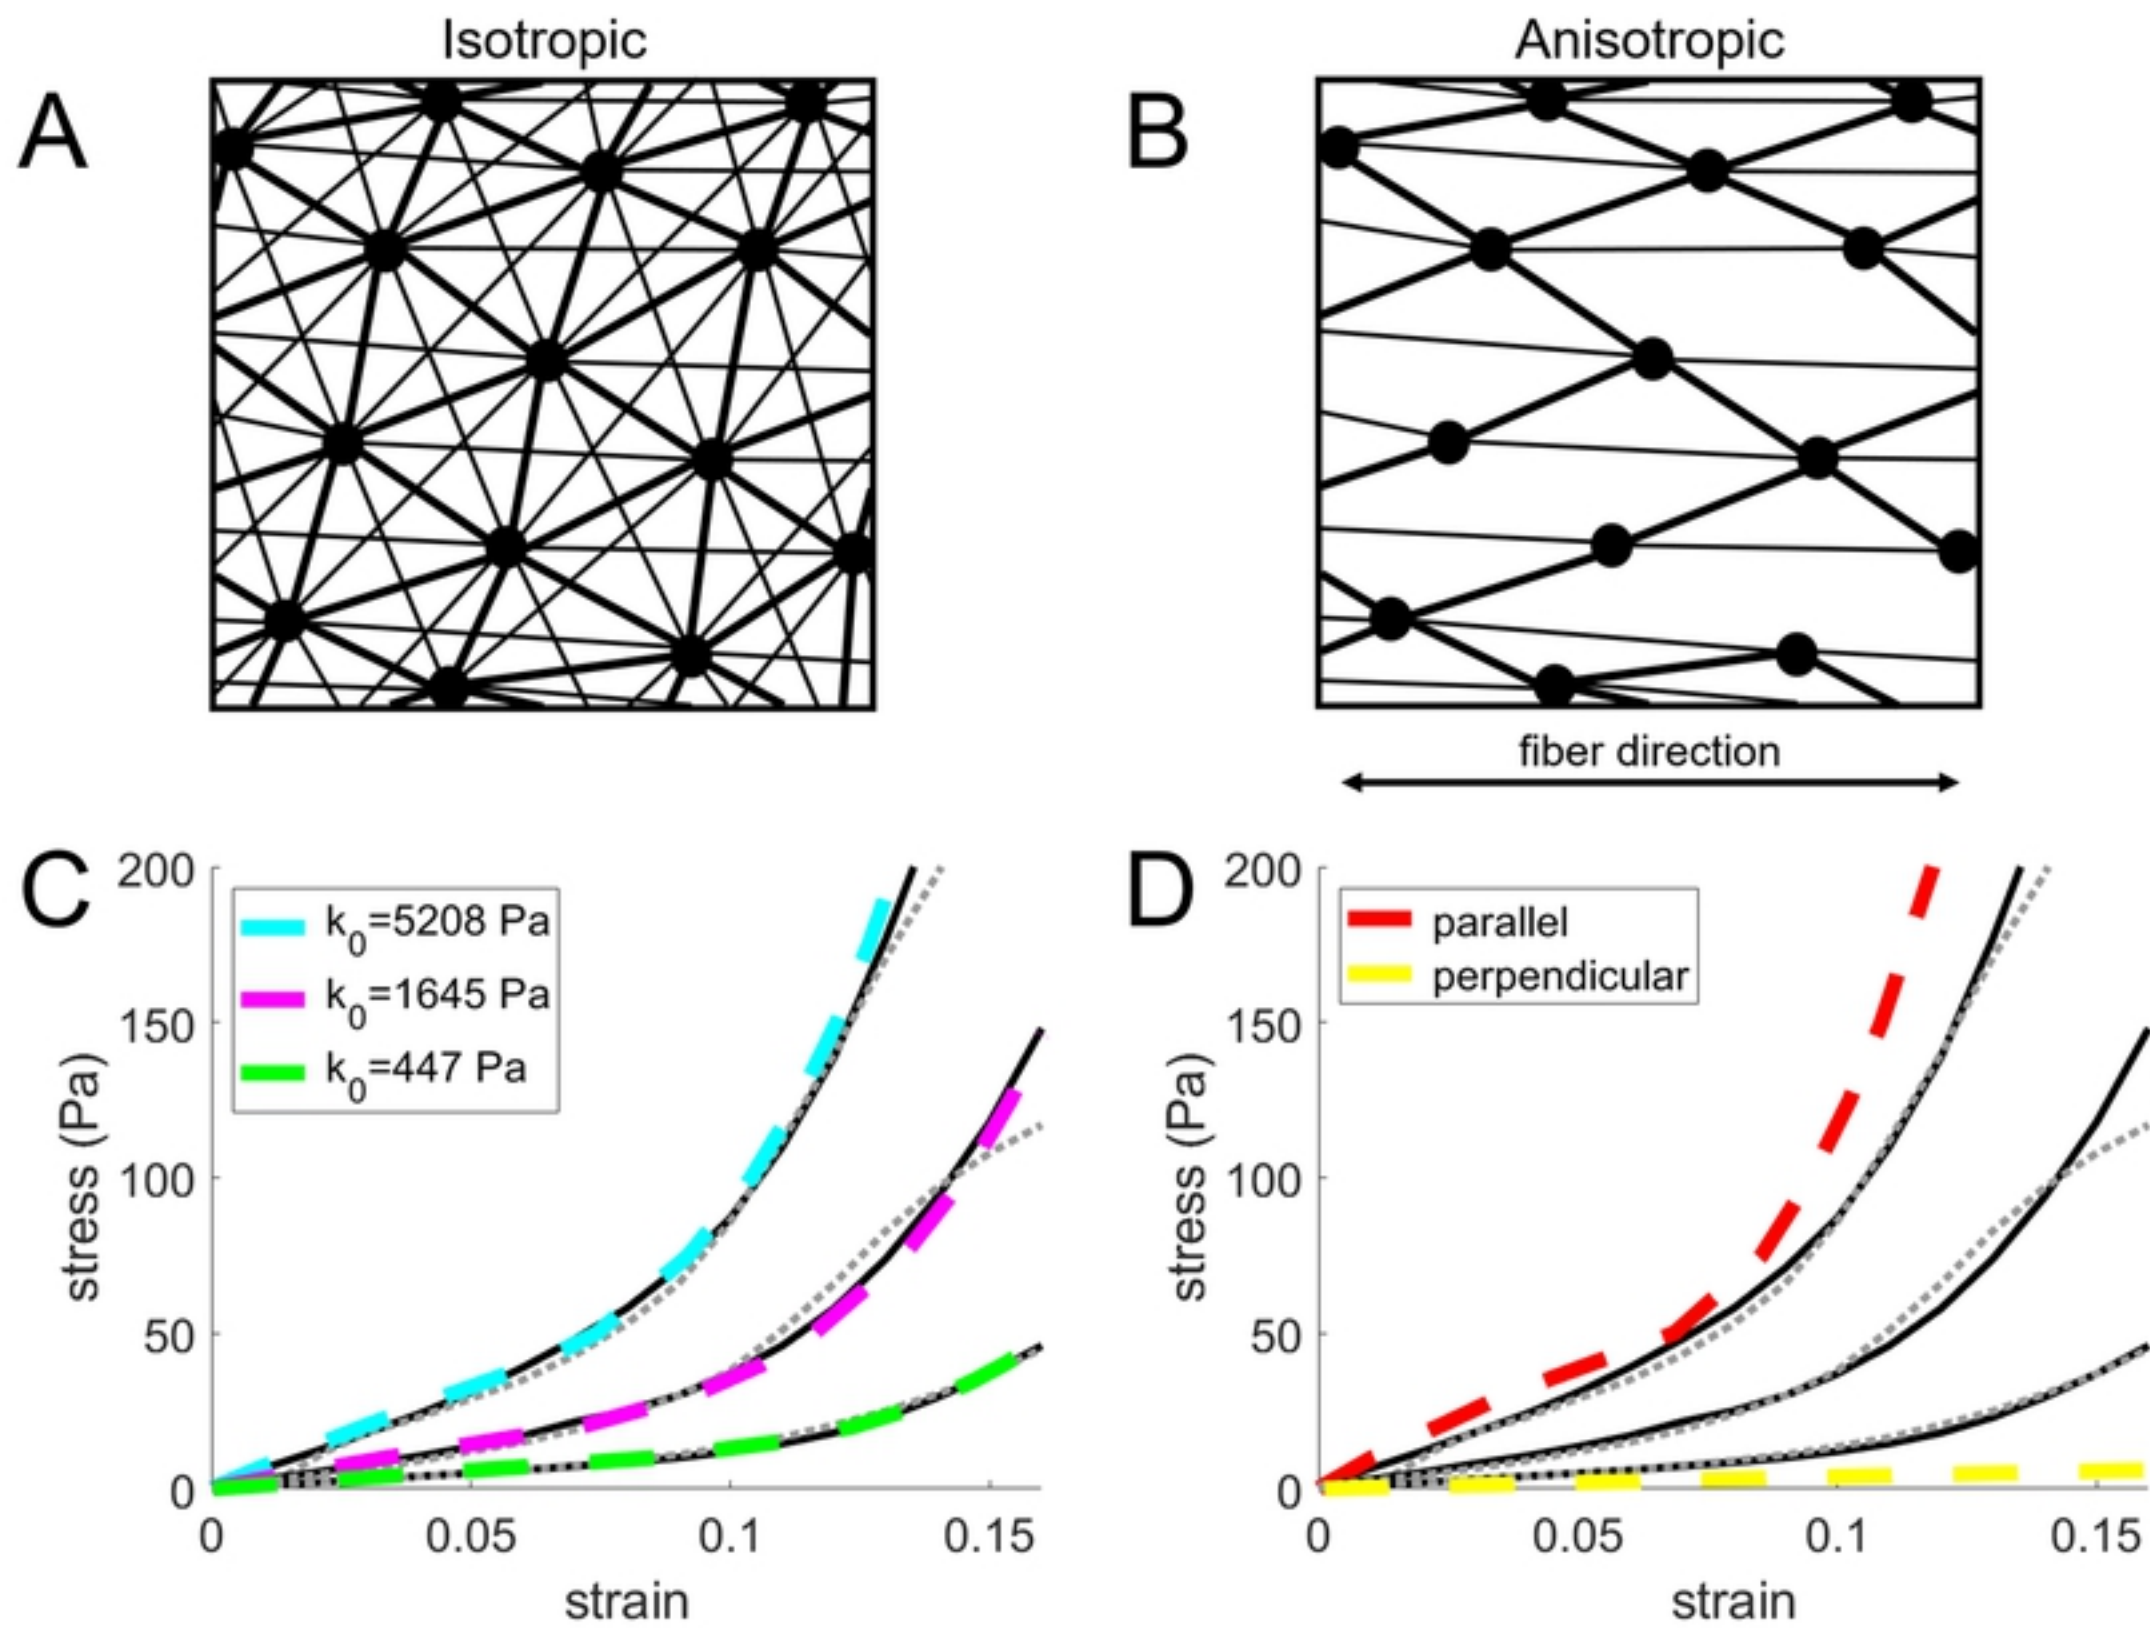

Fig2



### Protrusion formation

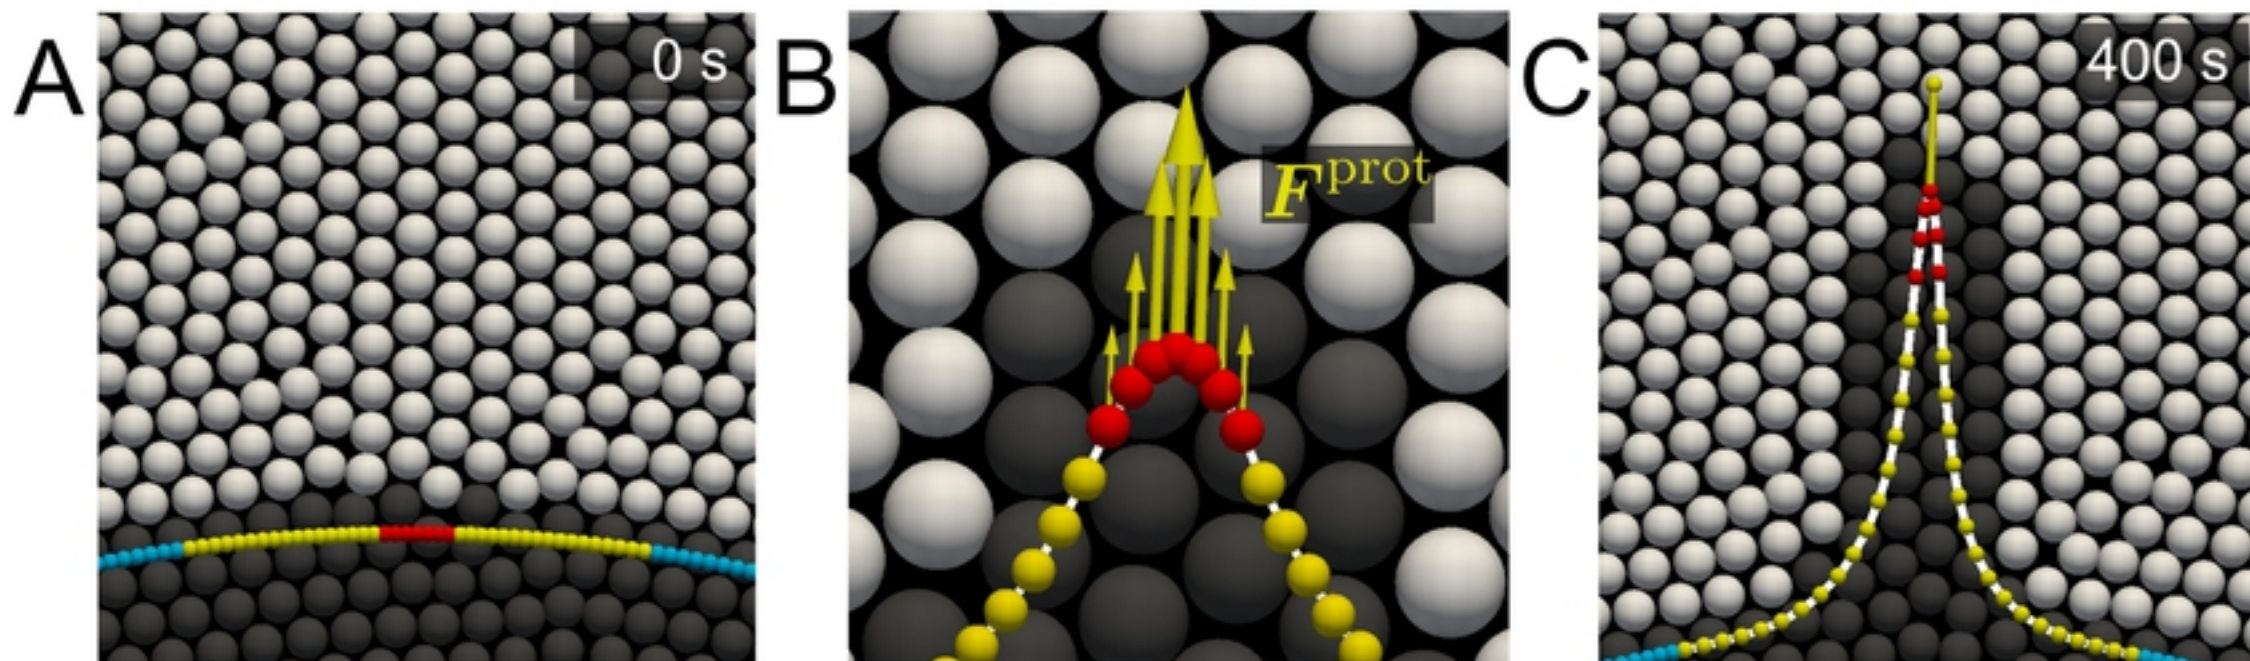

### Protrusion maturation and contraction

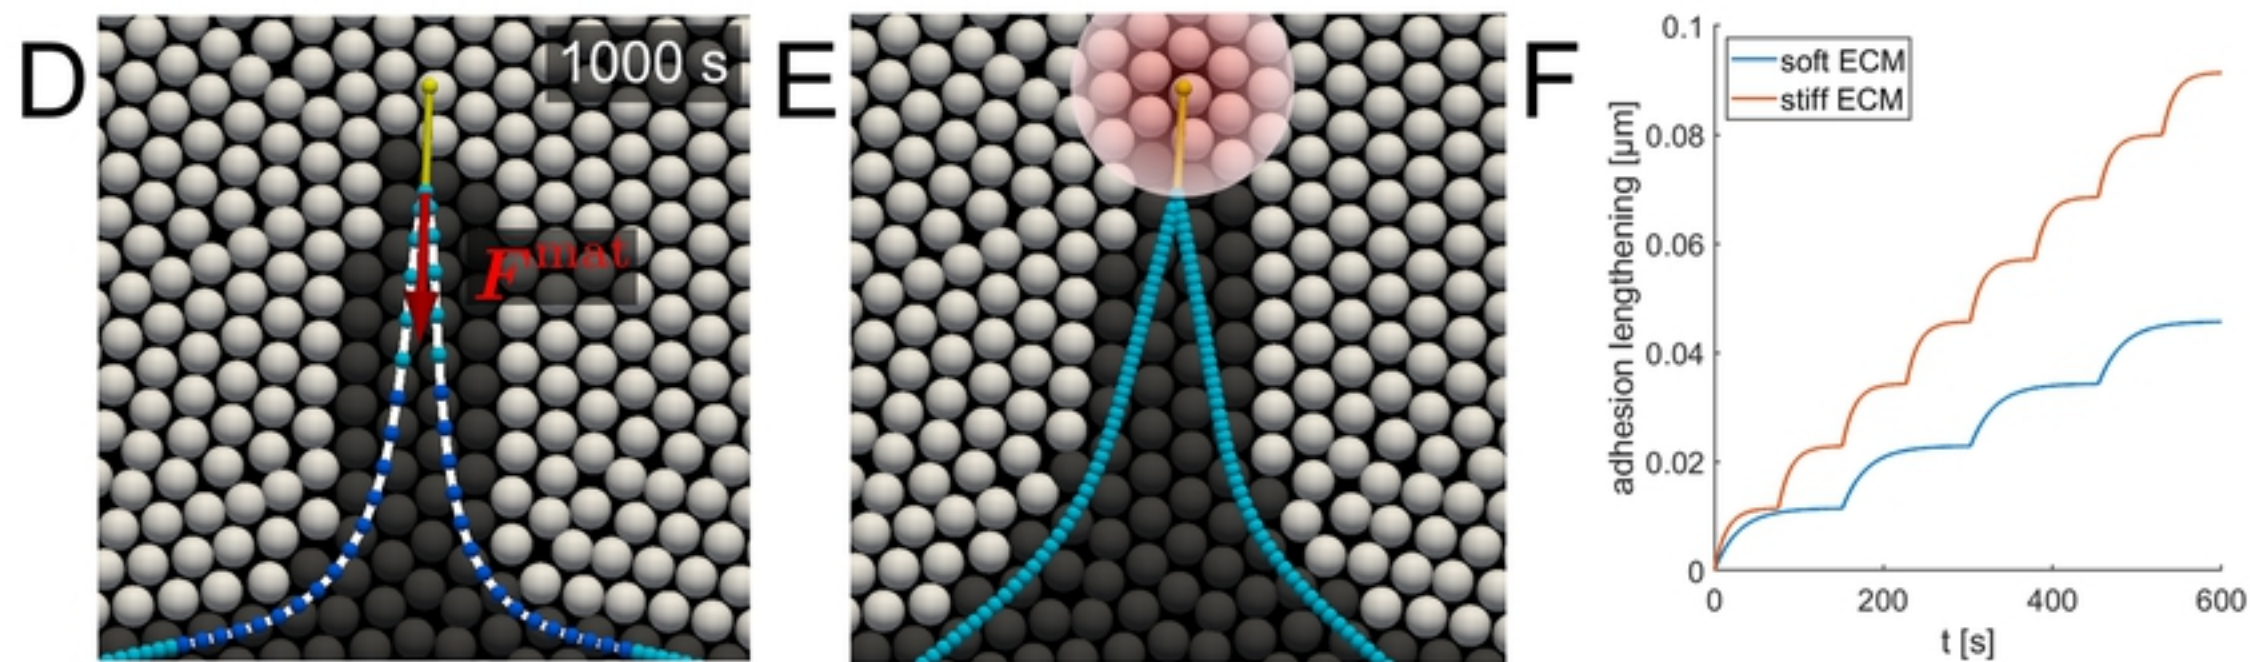

Fig3

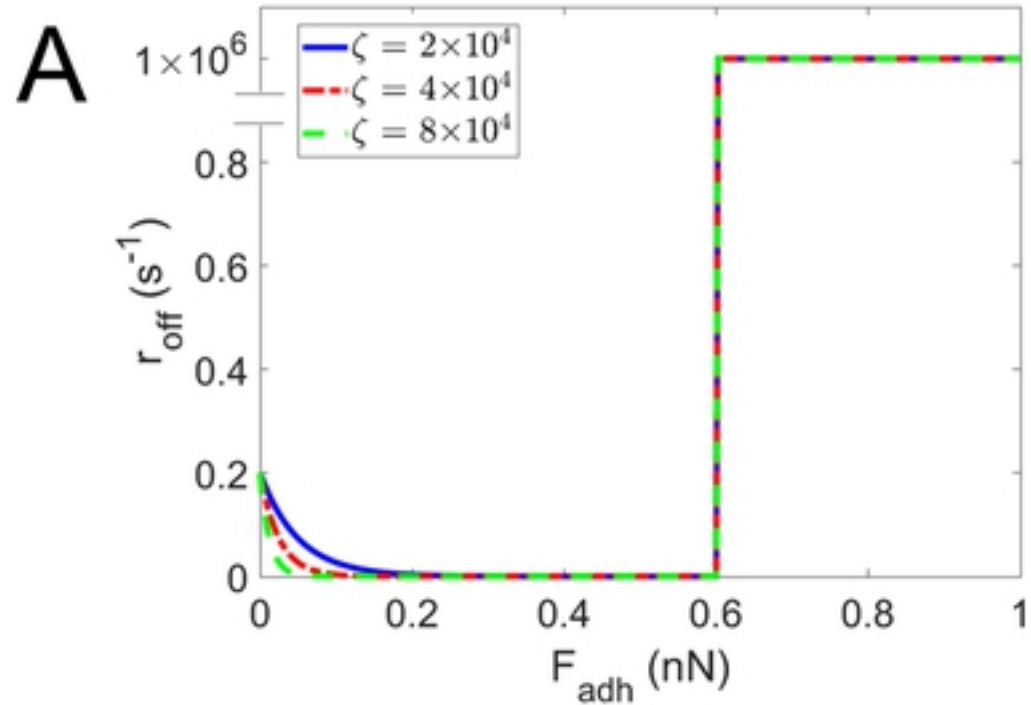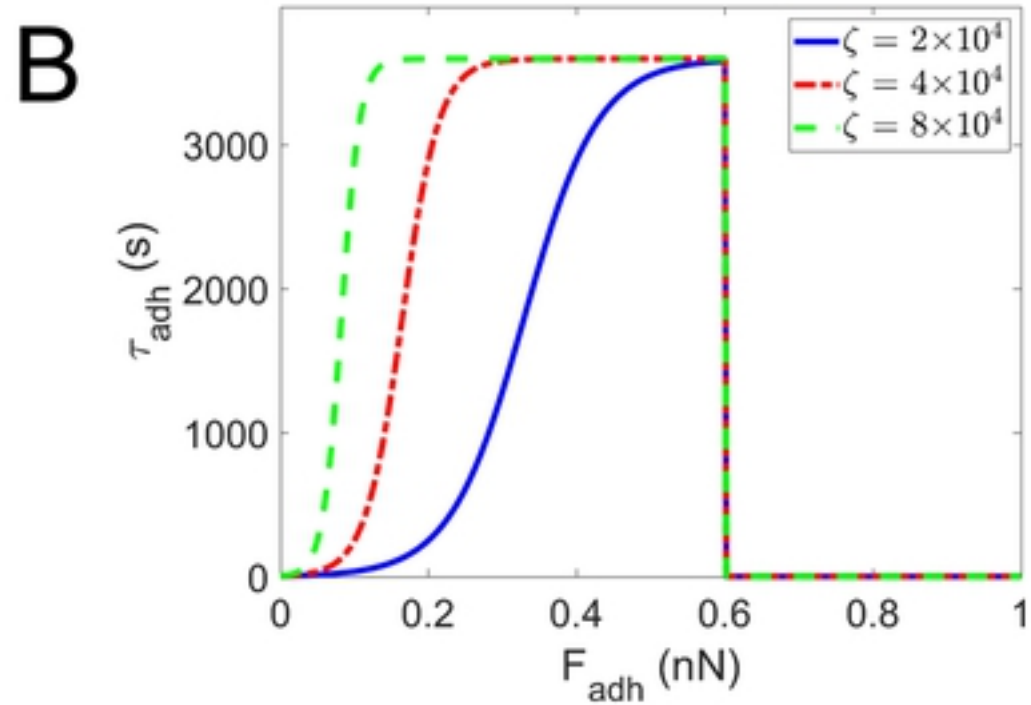

Fig4

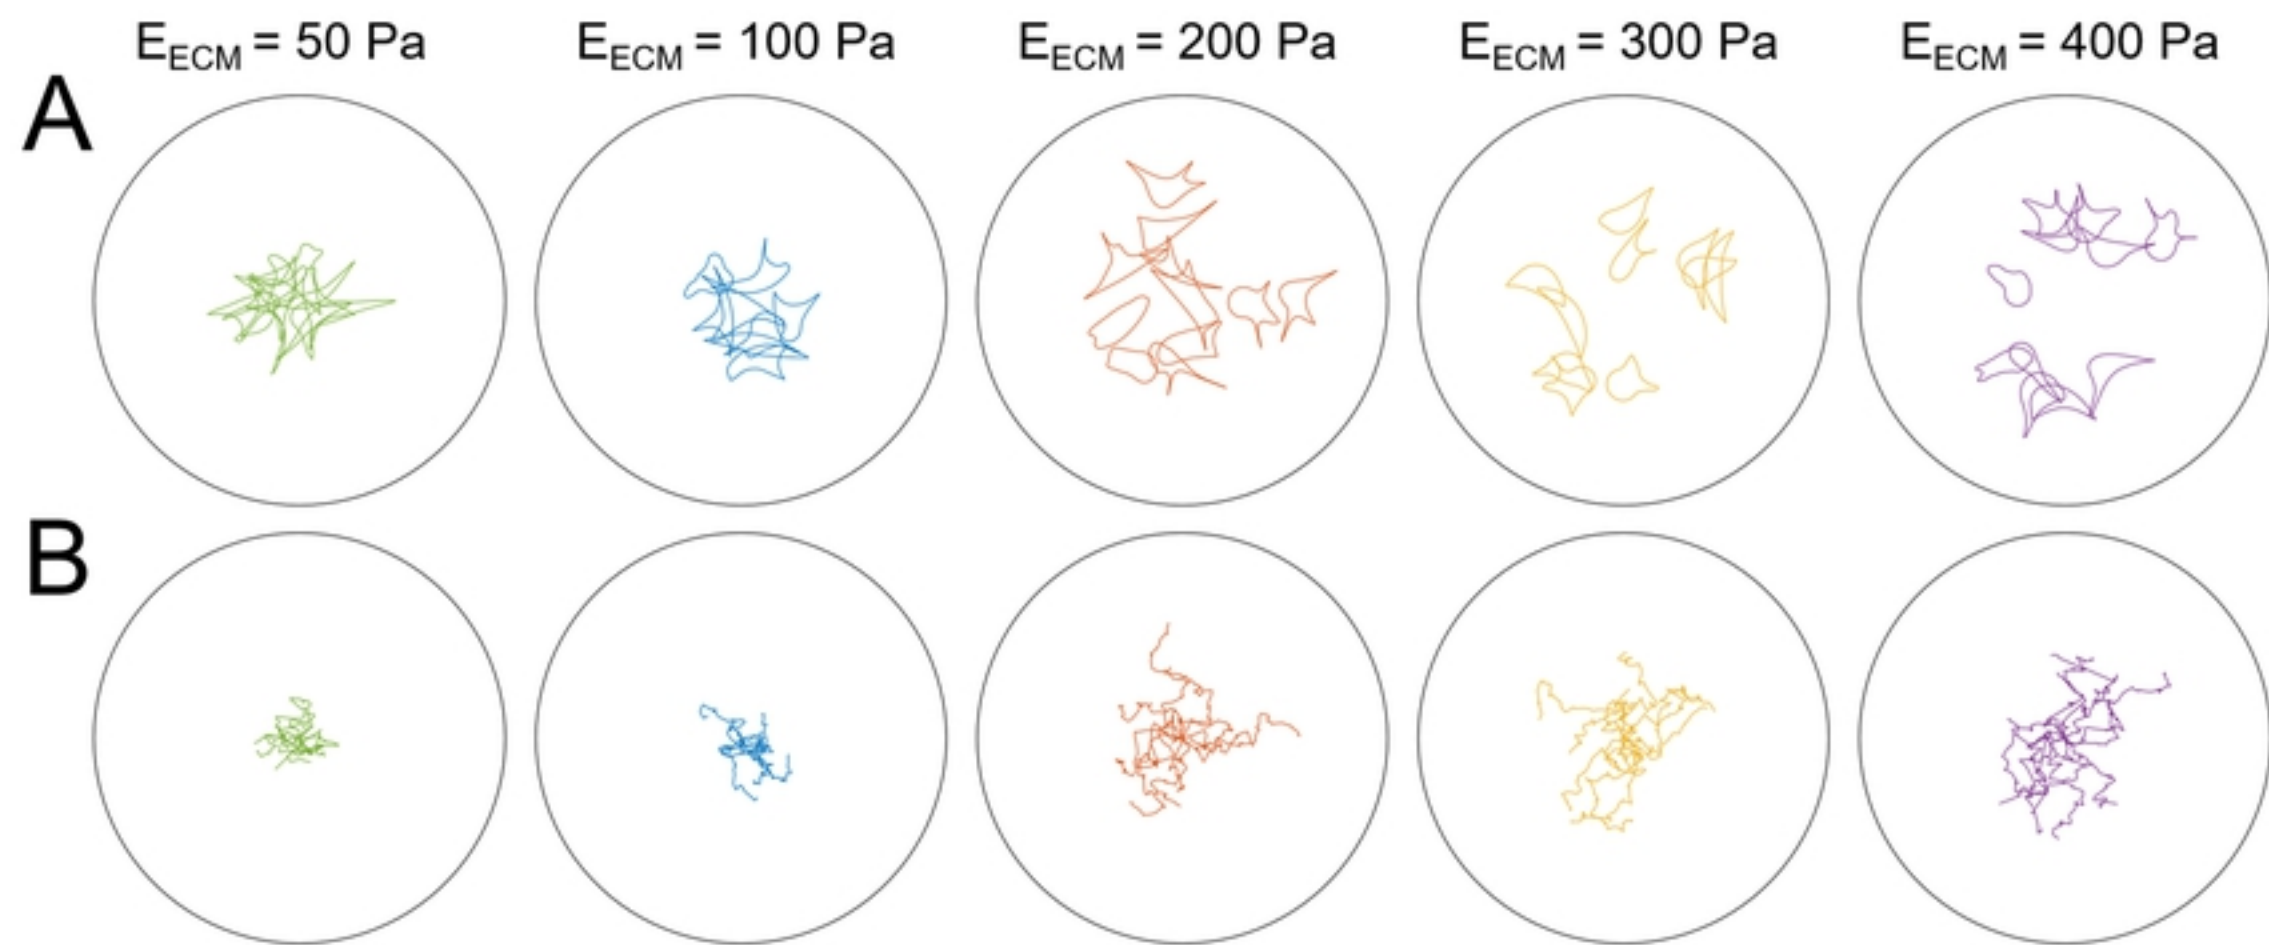

Fig5

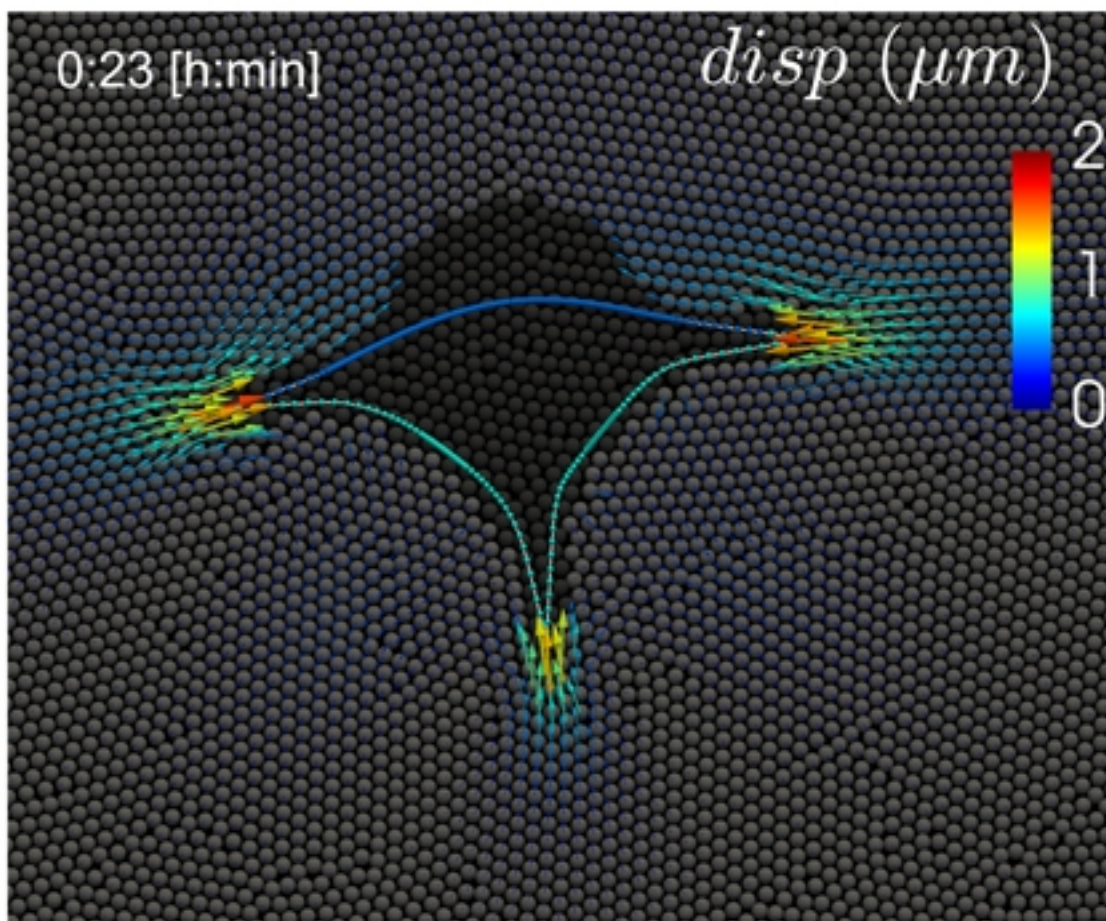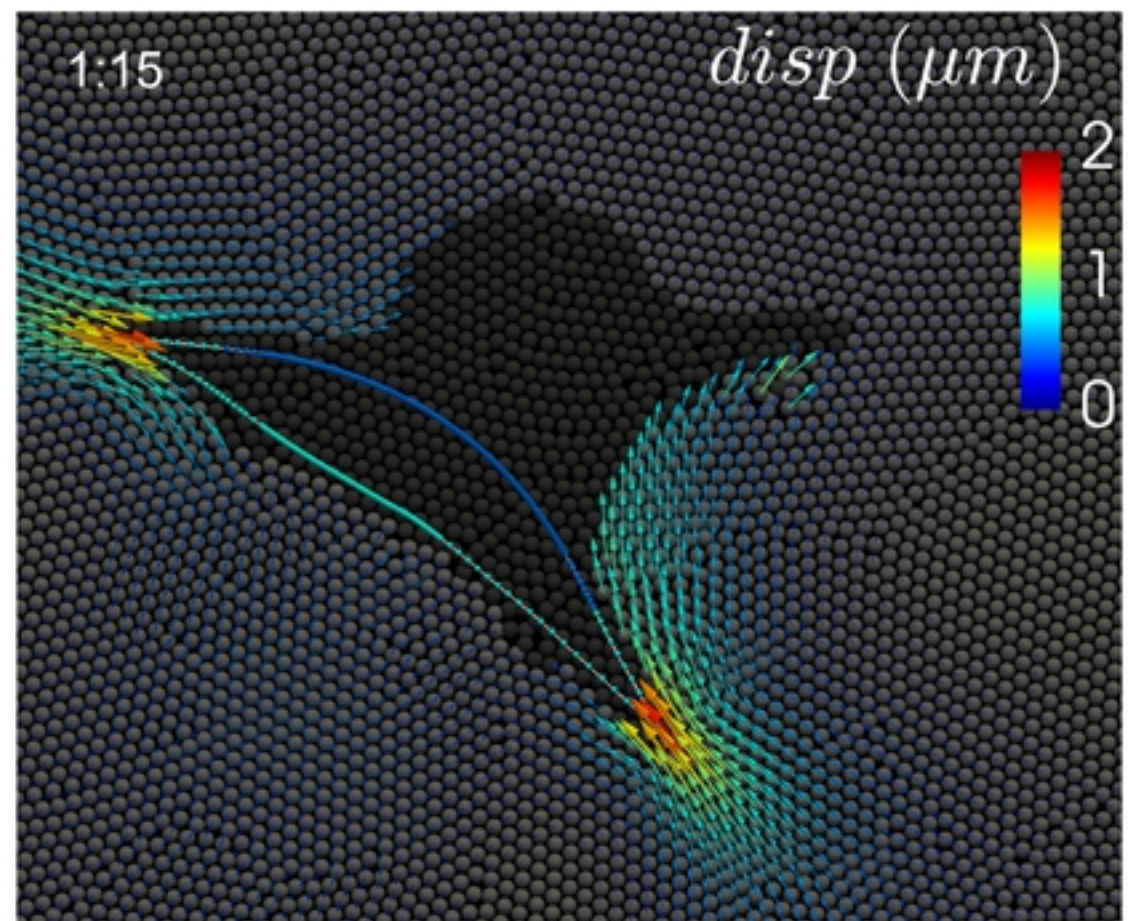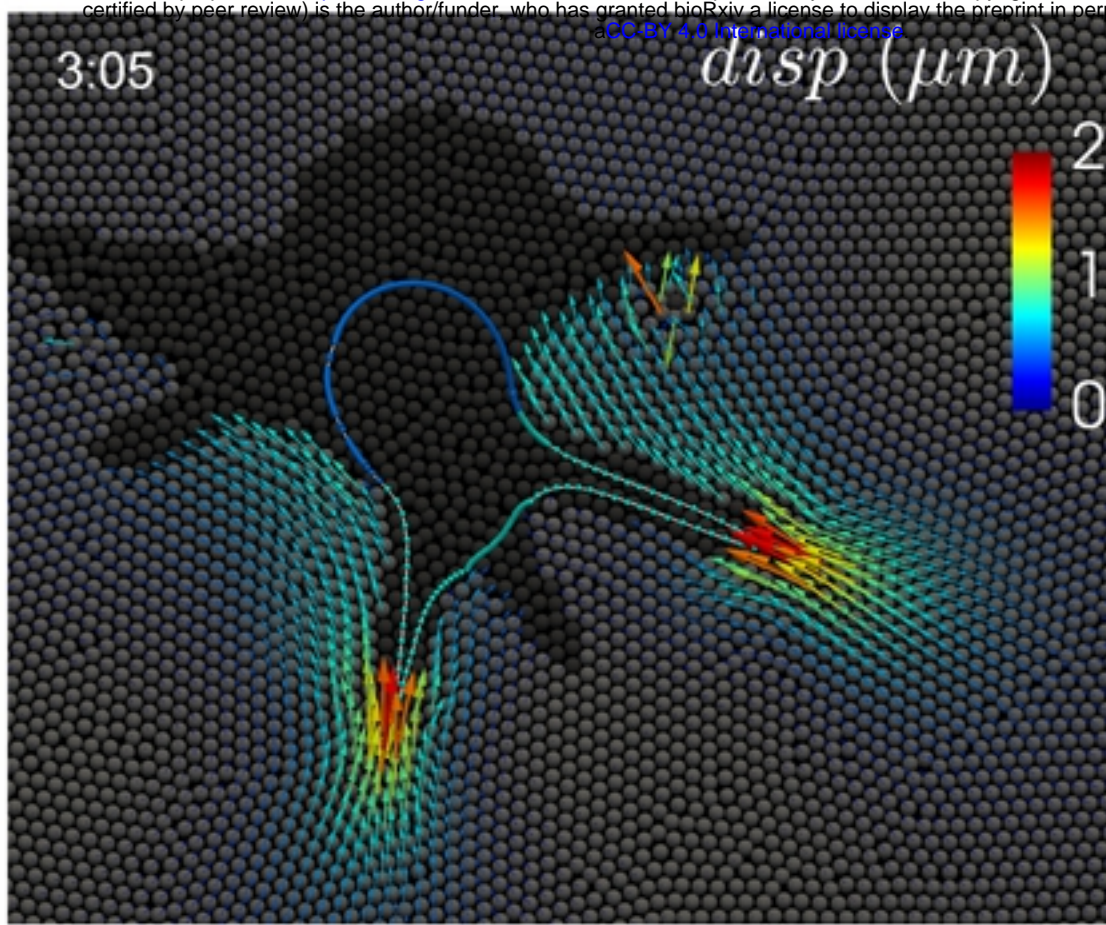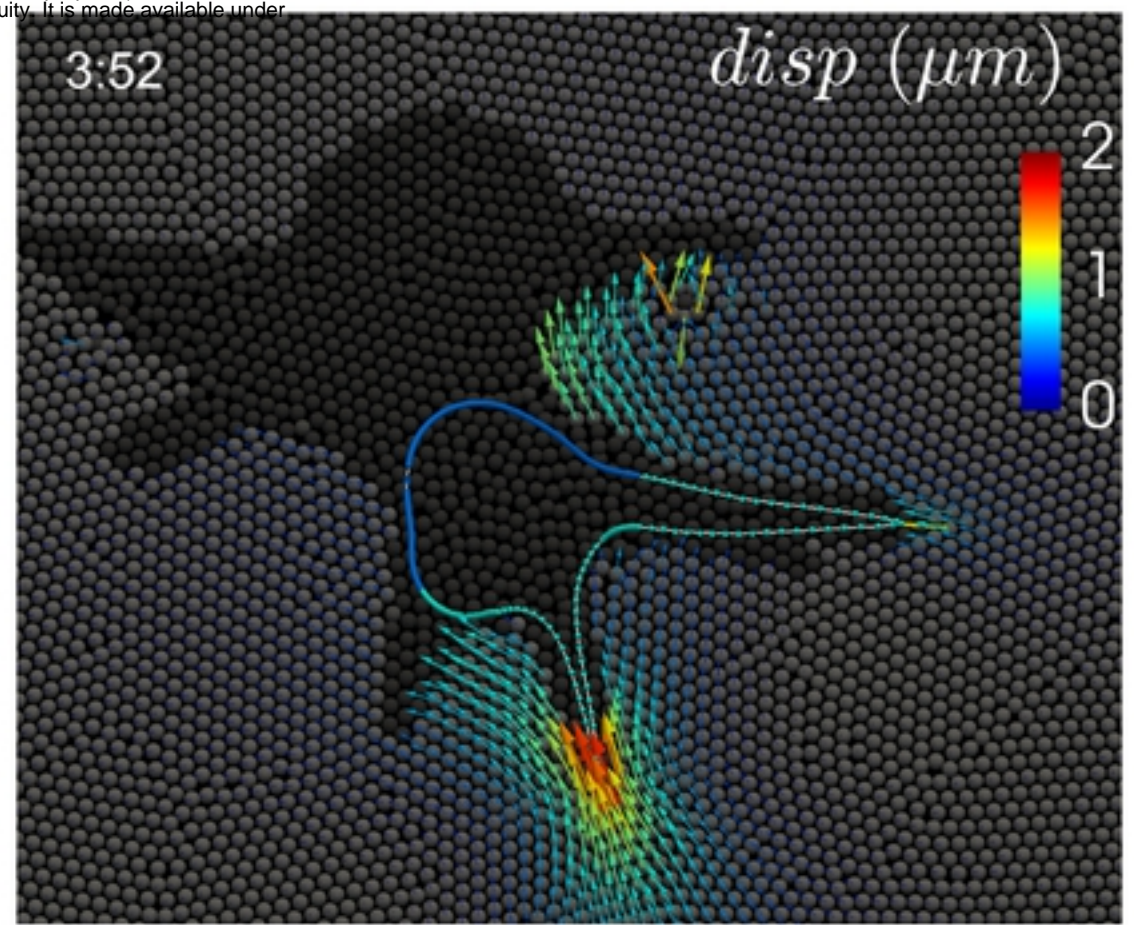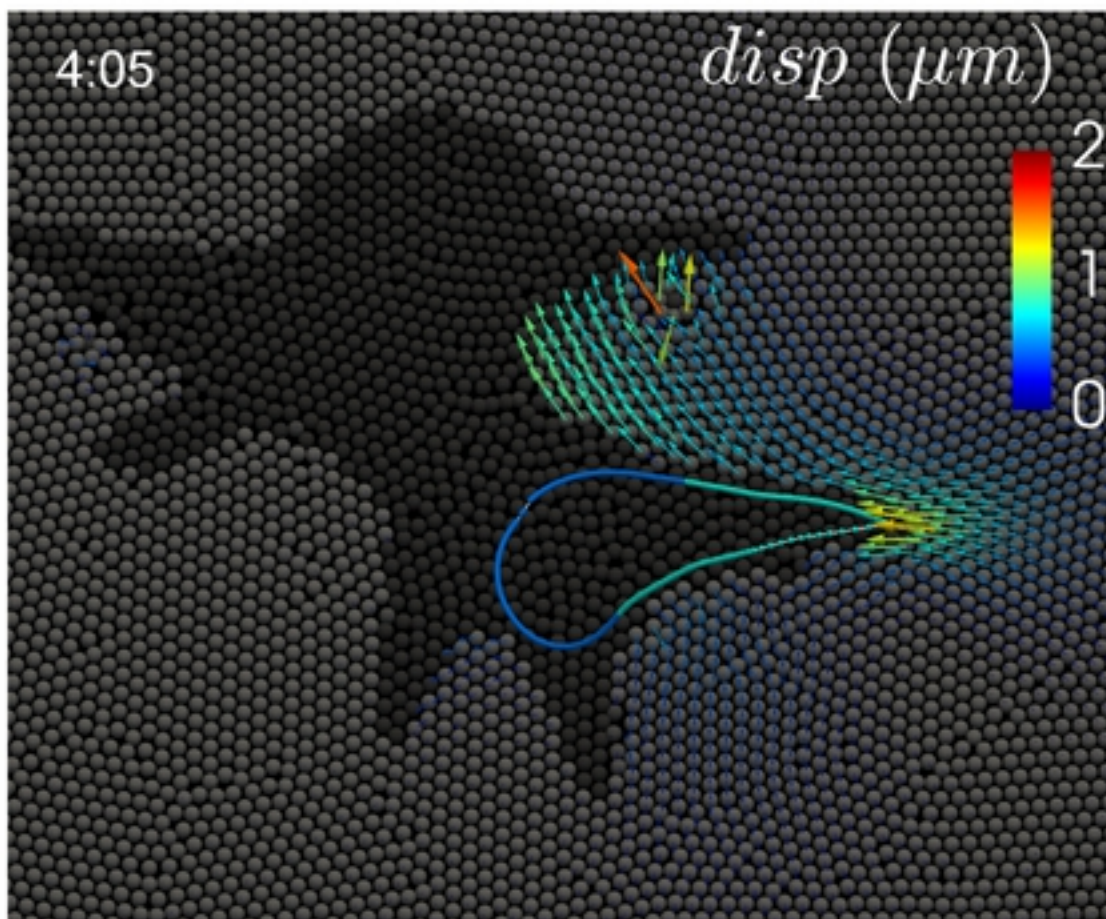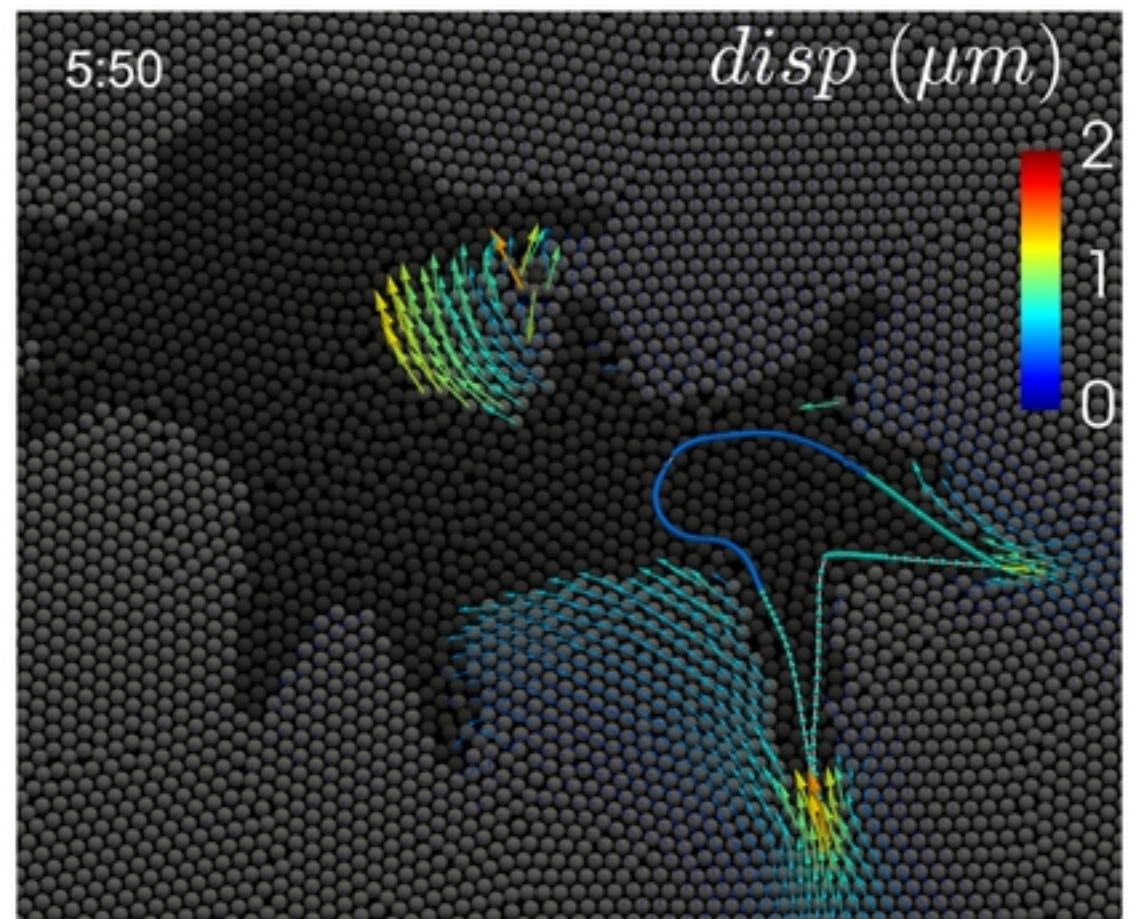

bioRxiv preprint doi: <https://doi.org/10.1101/697029>; this version posted July 9, 2019. The copyright holder for this preprint (which was not certified by peer review) is the author/funder, who has granted bioRxiv a license to display the preprint in perpetuity. It is made available under aCC-BY 4.0 International license.

Fig6

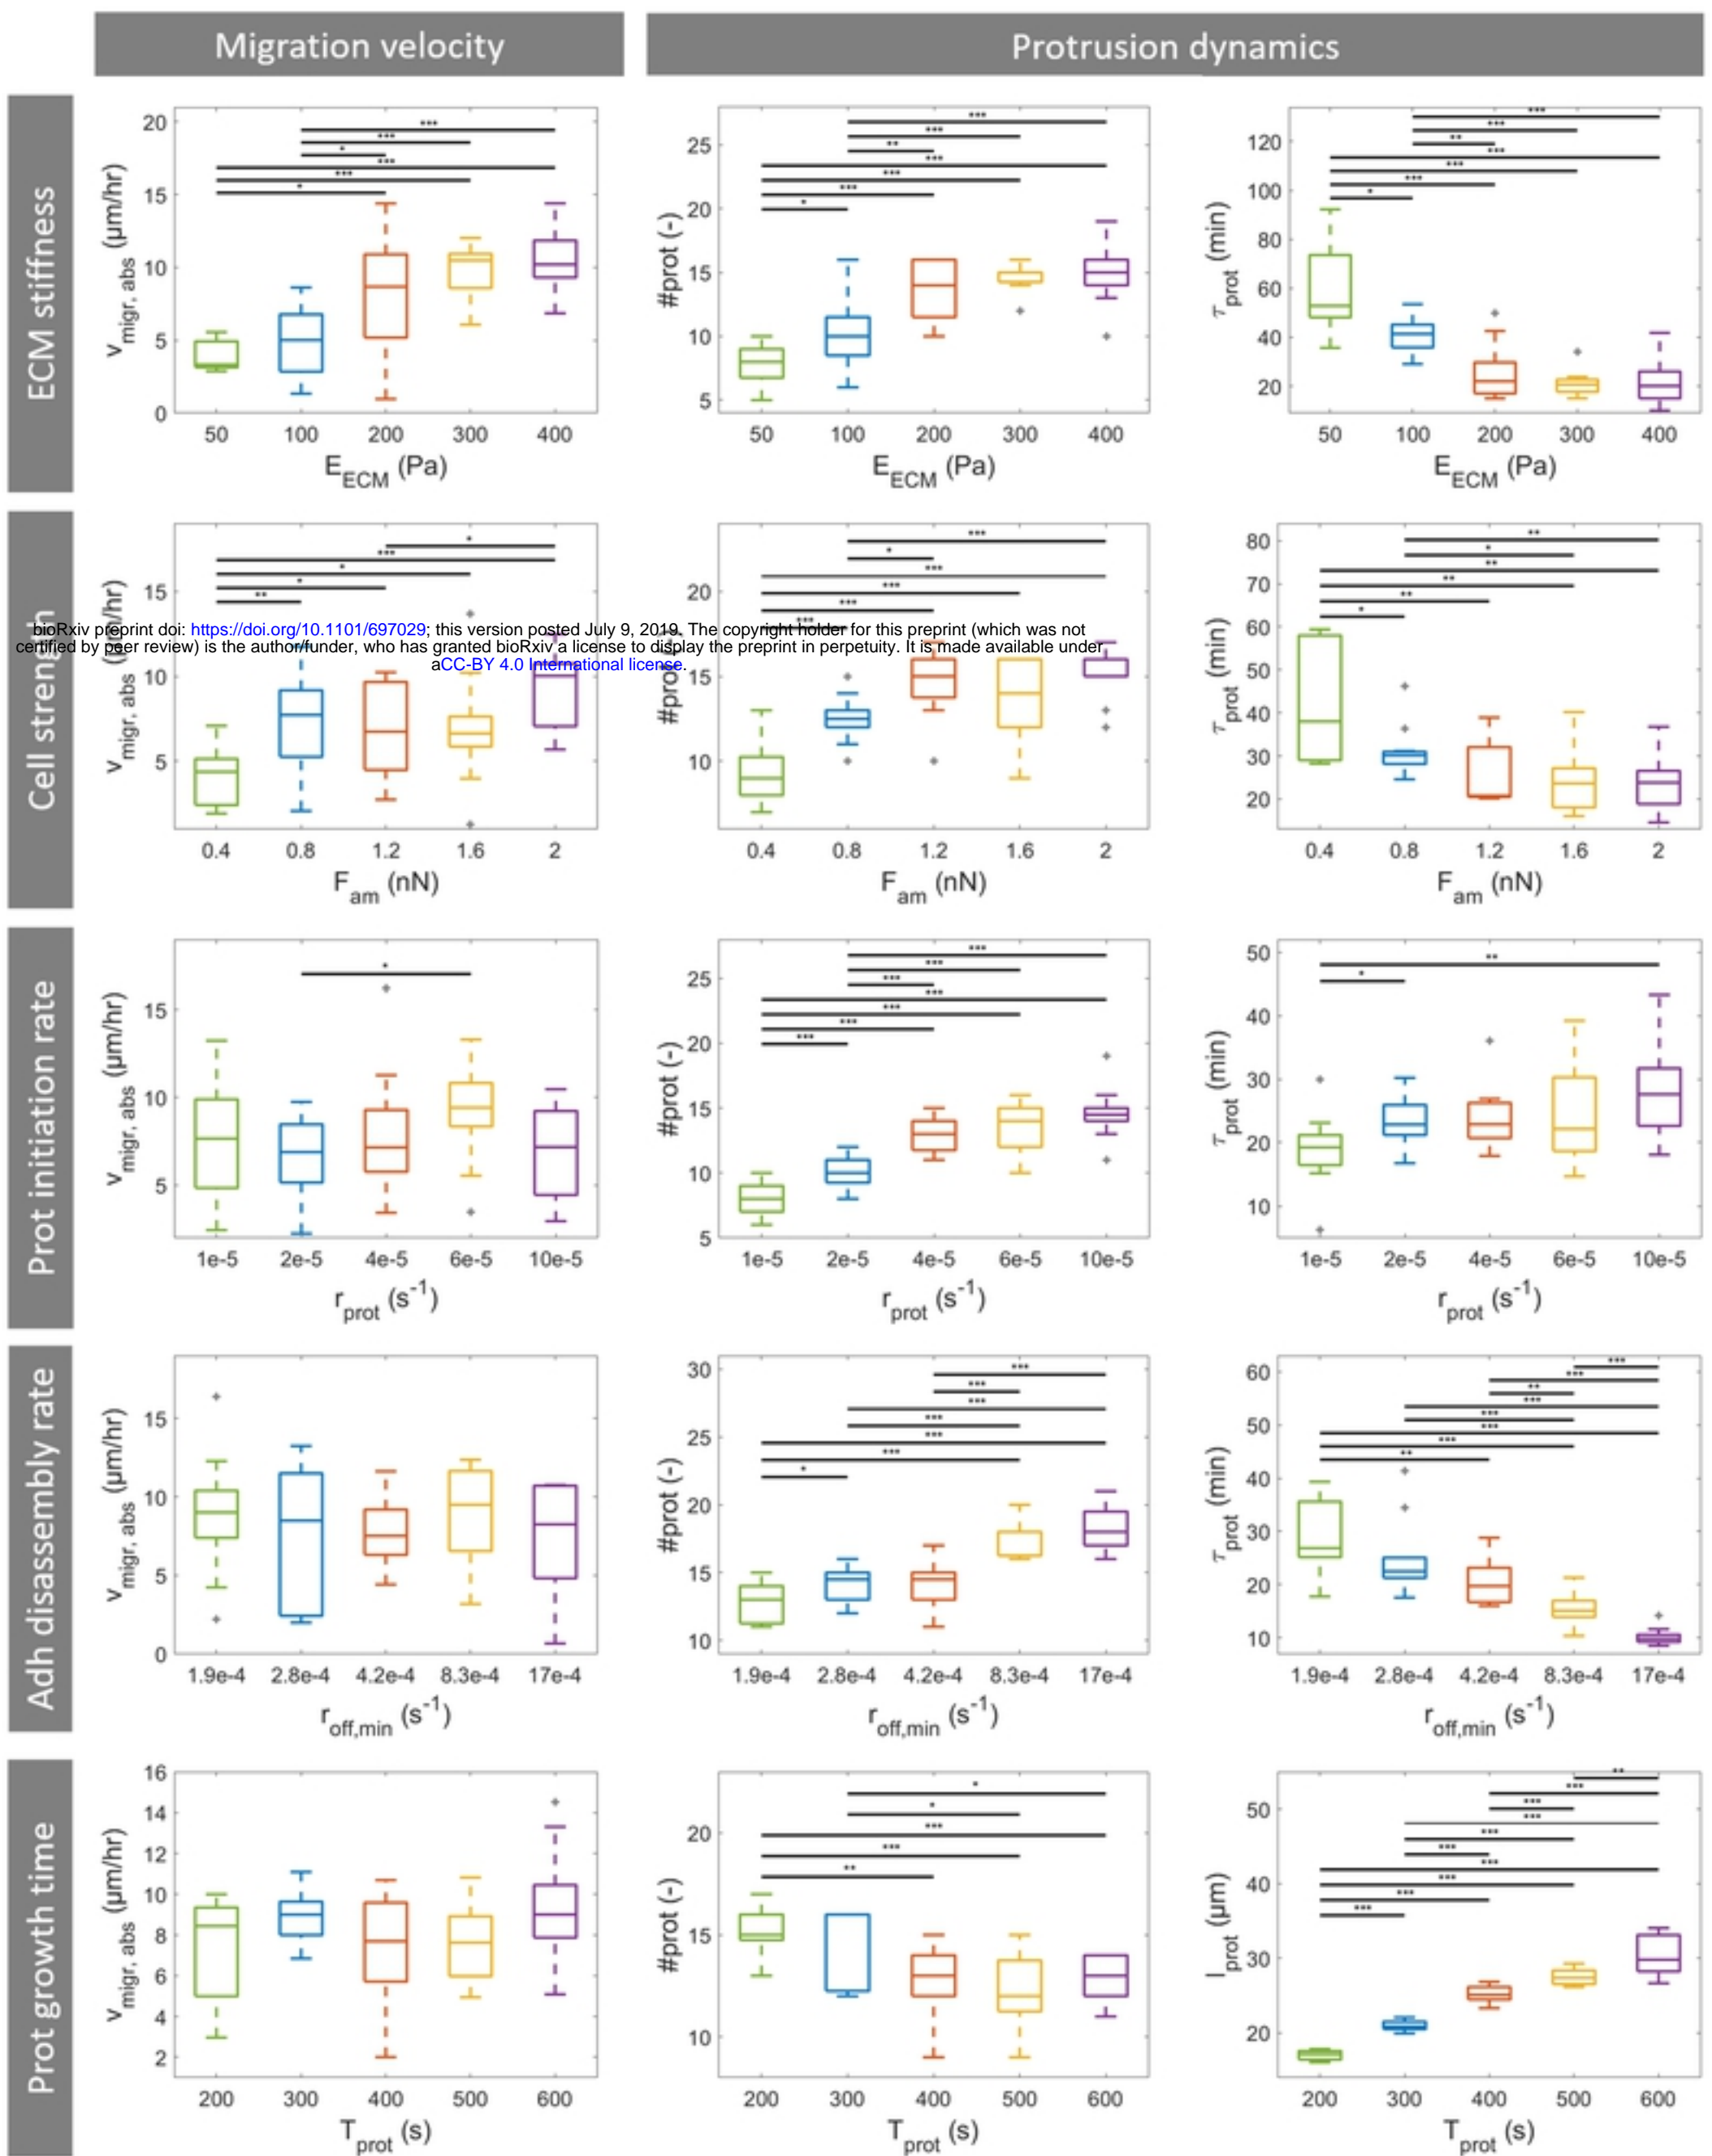

Fig7

# A Distribution of relative force $f_{adh,rel}$ at adhesion disassembly

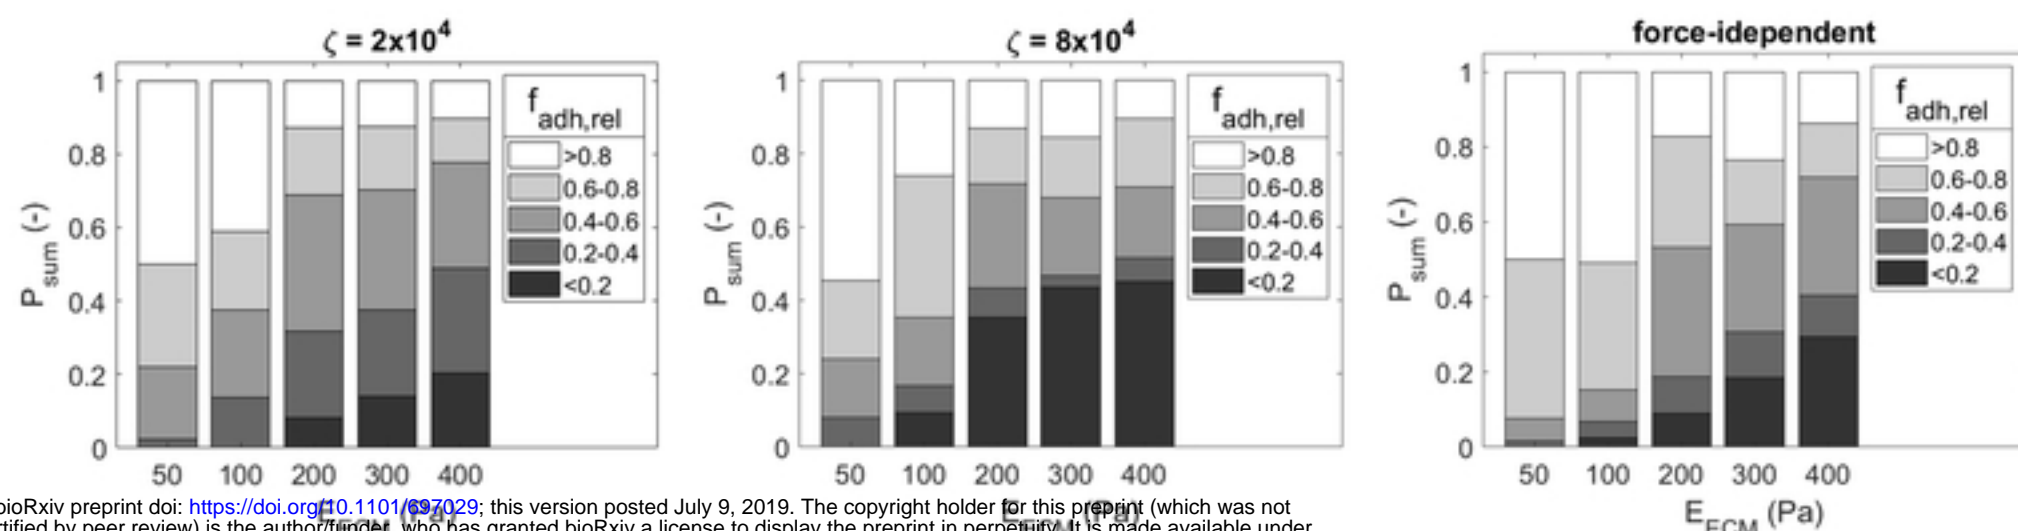

bioRxiv preprint doi: <https://doi.org/10.1101/697029>; this version posted July 9, 2019. The copyright holder for this preprint (which was not certified by peer review) is the author/funder, who has granted bioRxiv a license to display the preprint in perpetuity. It is made available under aCC-BY 4.0 International license.

# B Force-dependent adhesion disassembly $\zeta=2 \times 10^4$ vs $\zeta=8 \times 10^4$

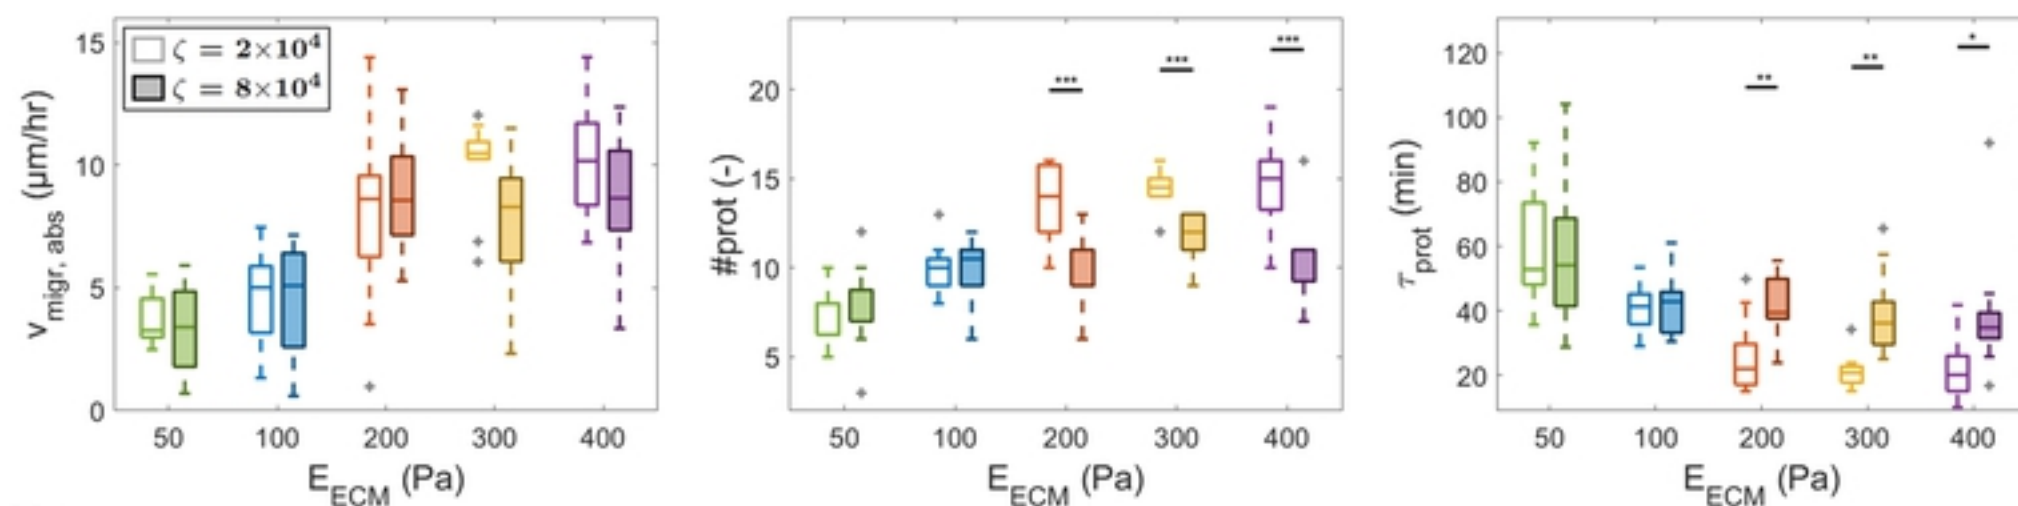

# C Force-dependent adhesion disassembly $\zeta=2 \times 10^4$ vs force-independent adhesions disassembly

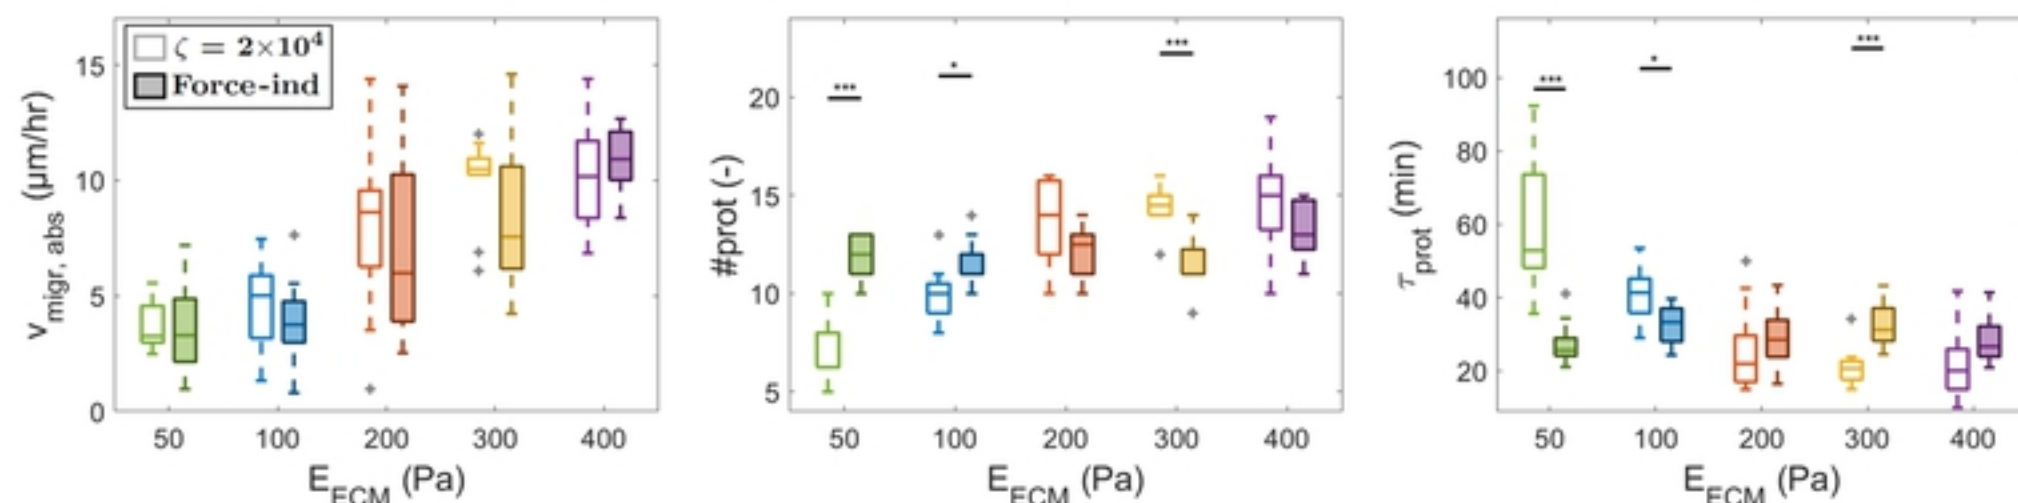

# D Force-dependent adhesion disassembly $\zeta=8 \times 10^4$ vs force-independent adhesions disassembly

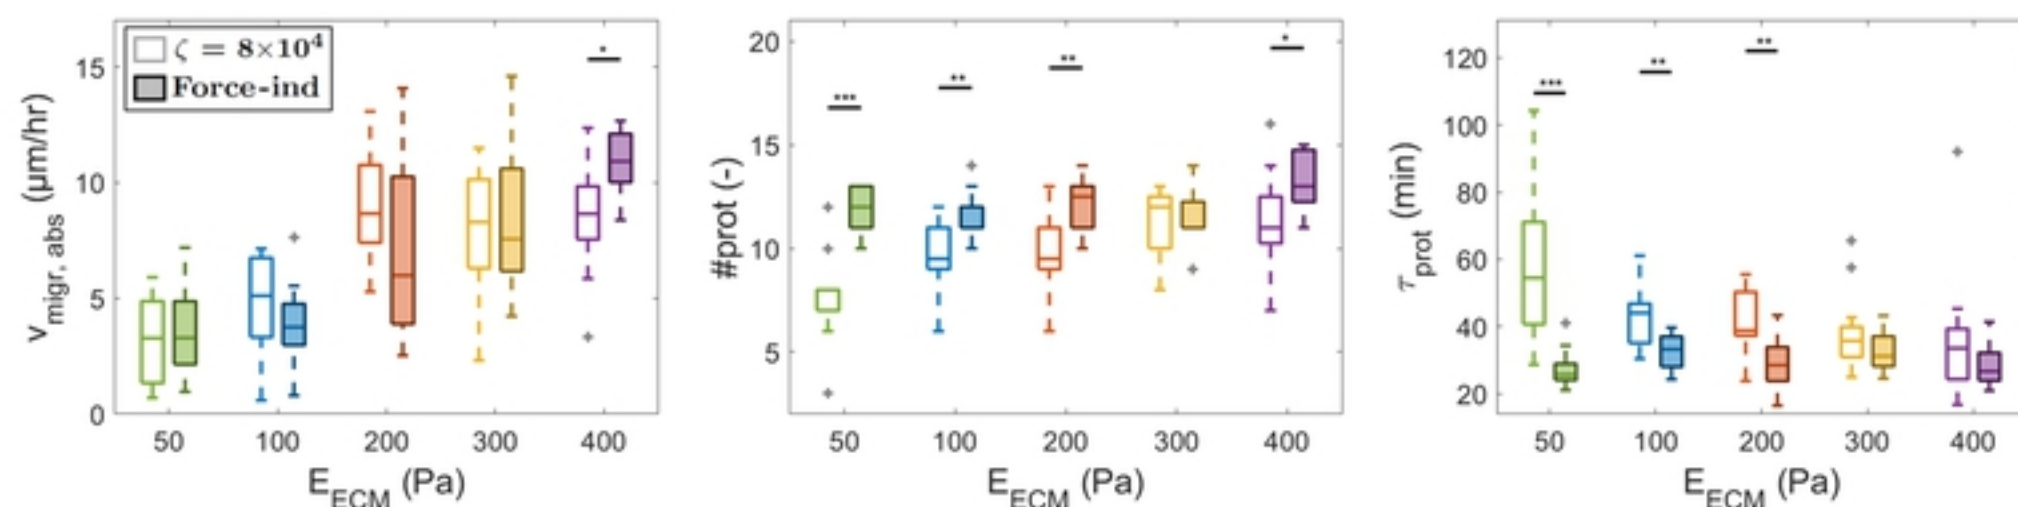

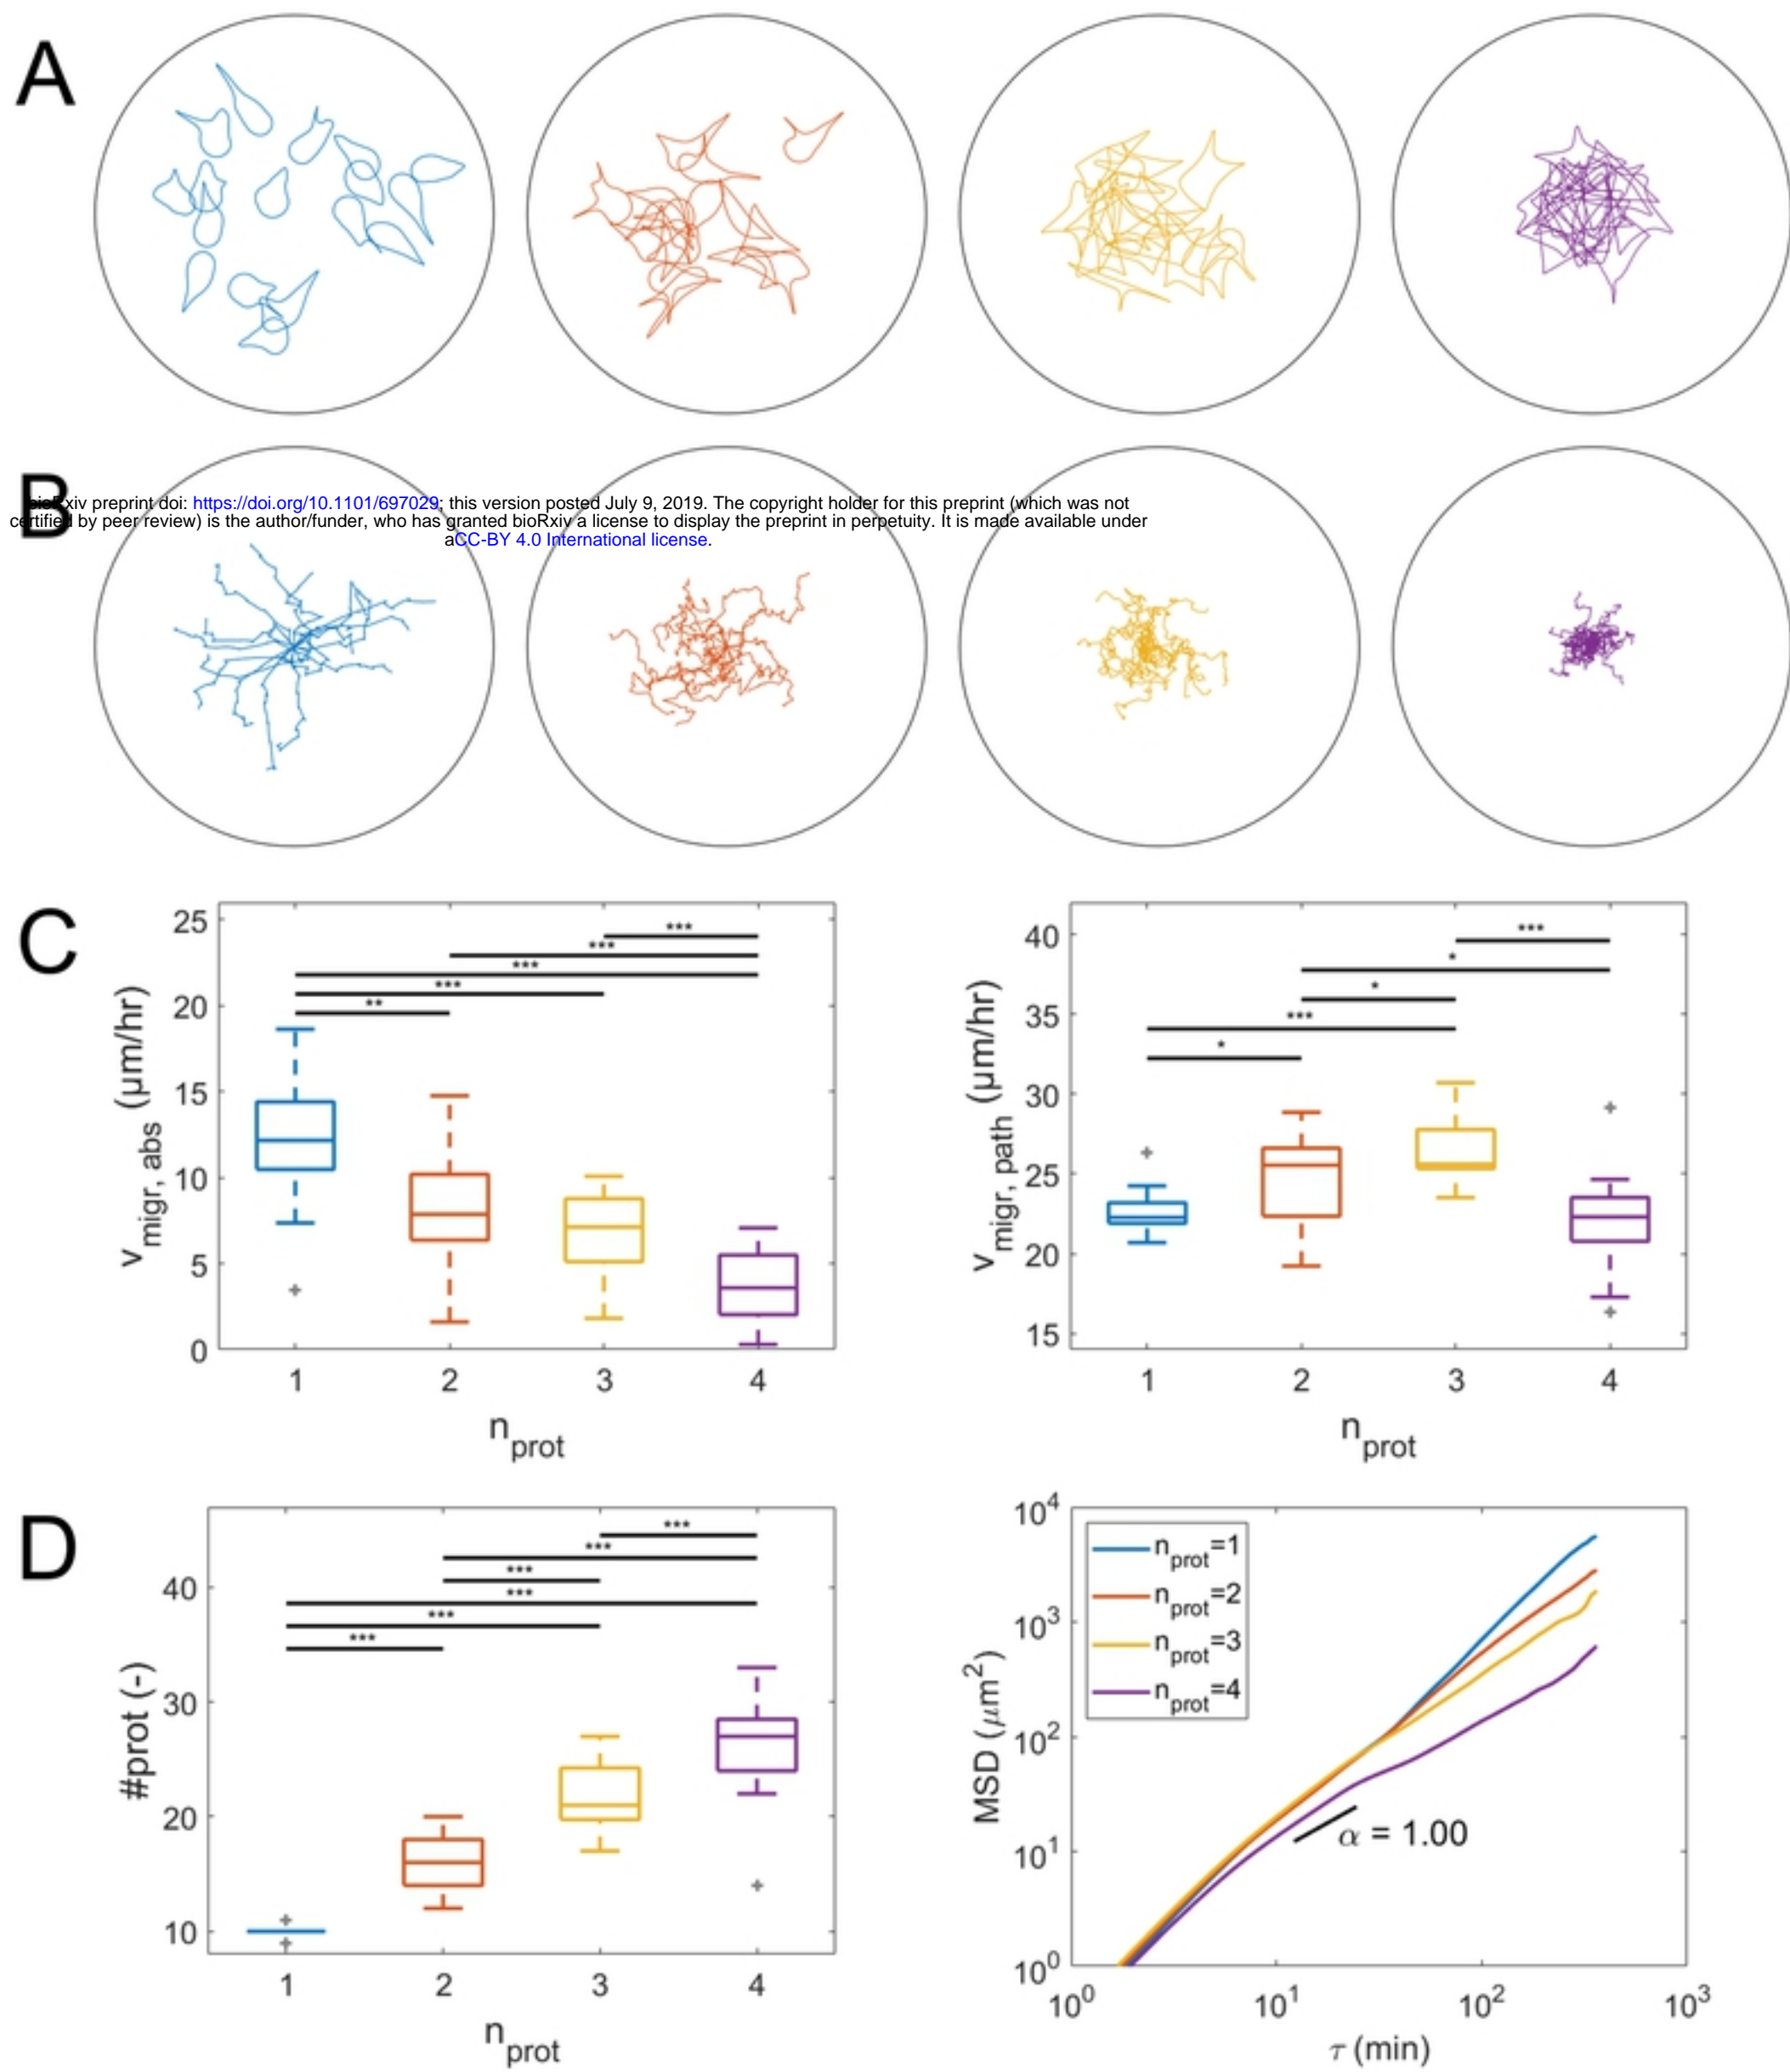

Fig9

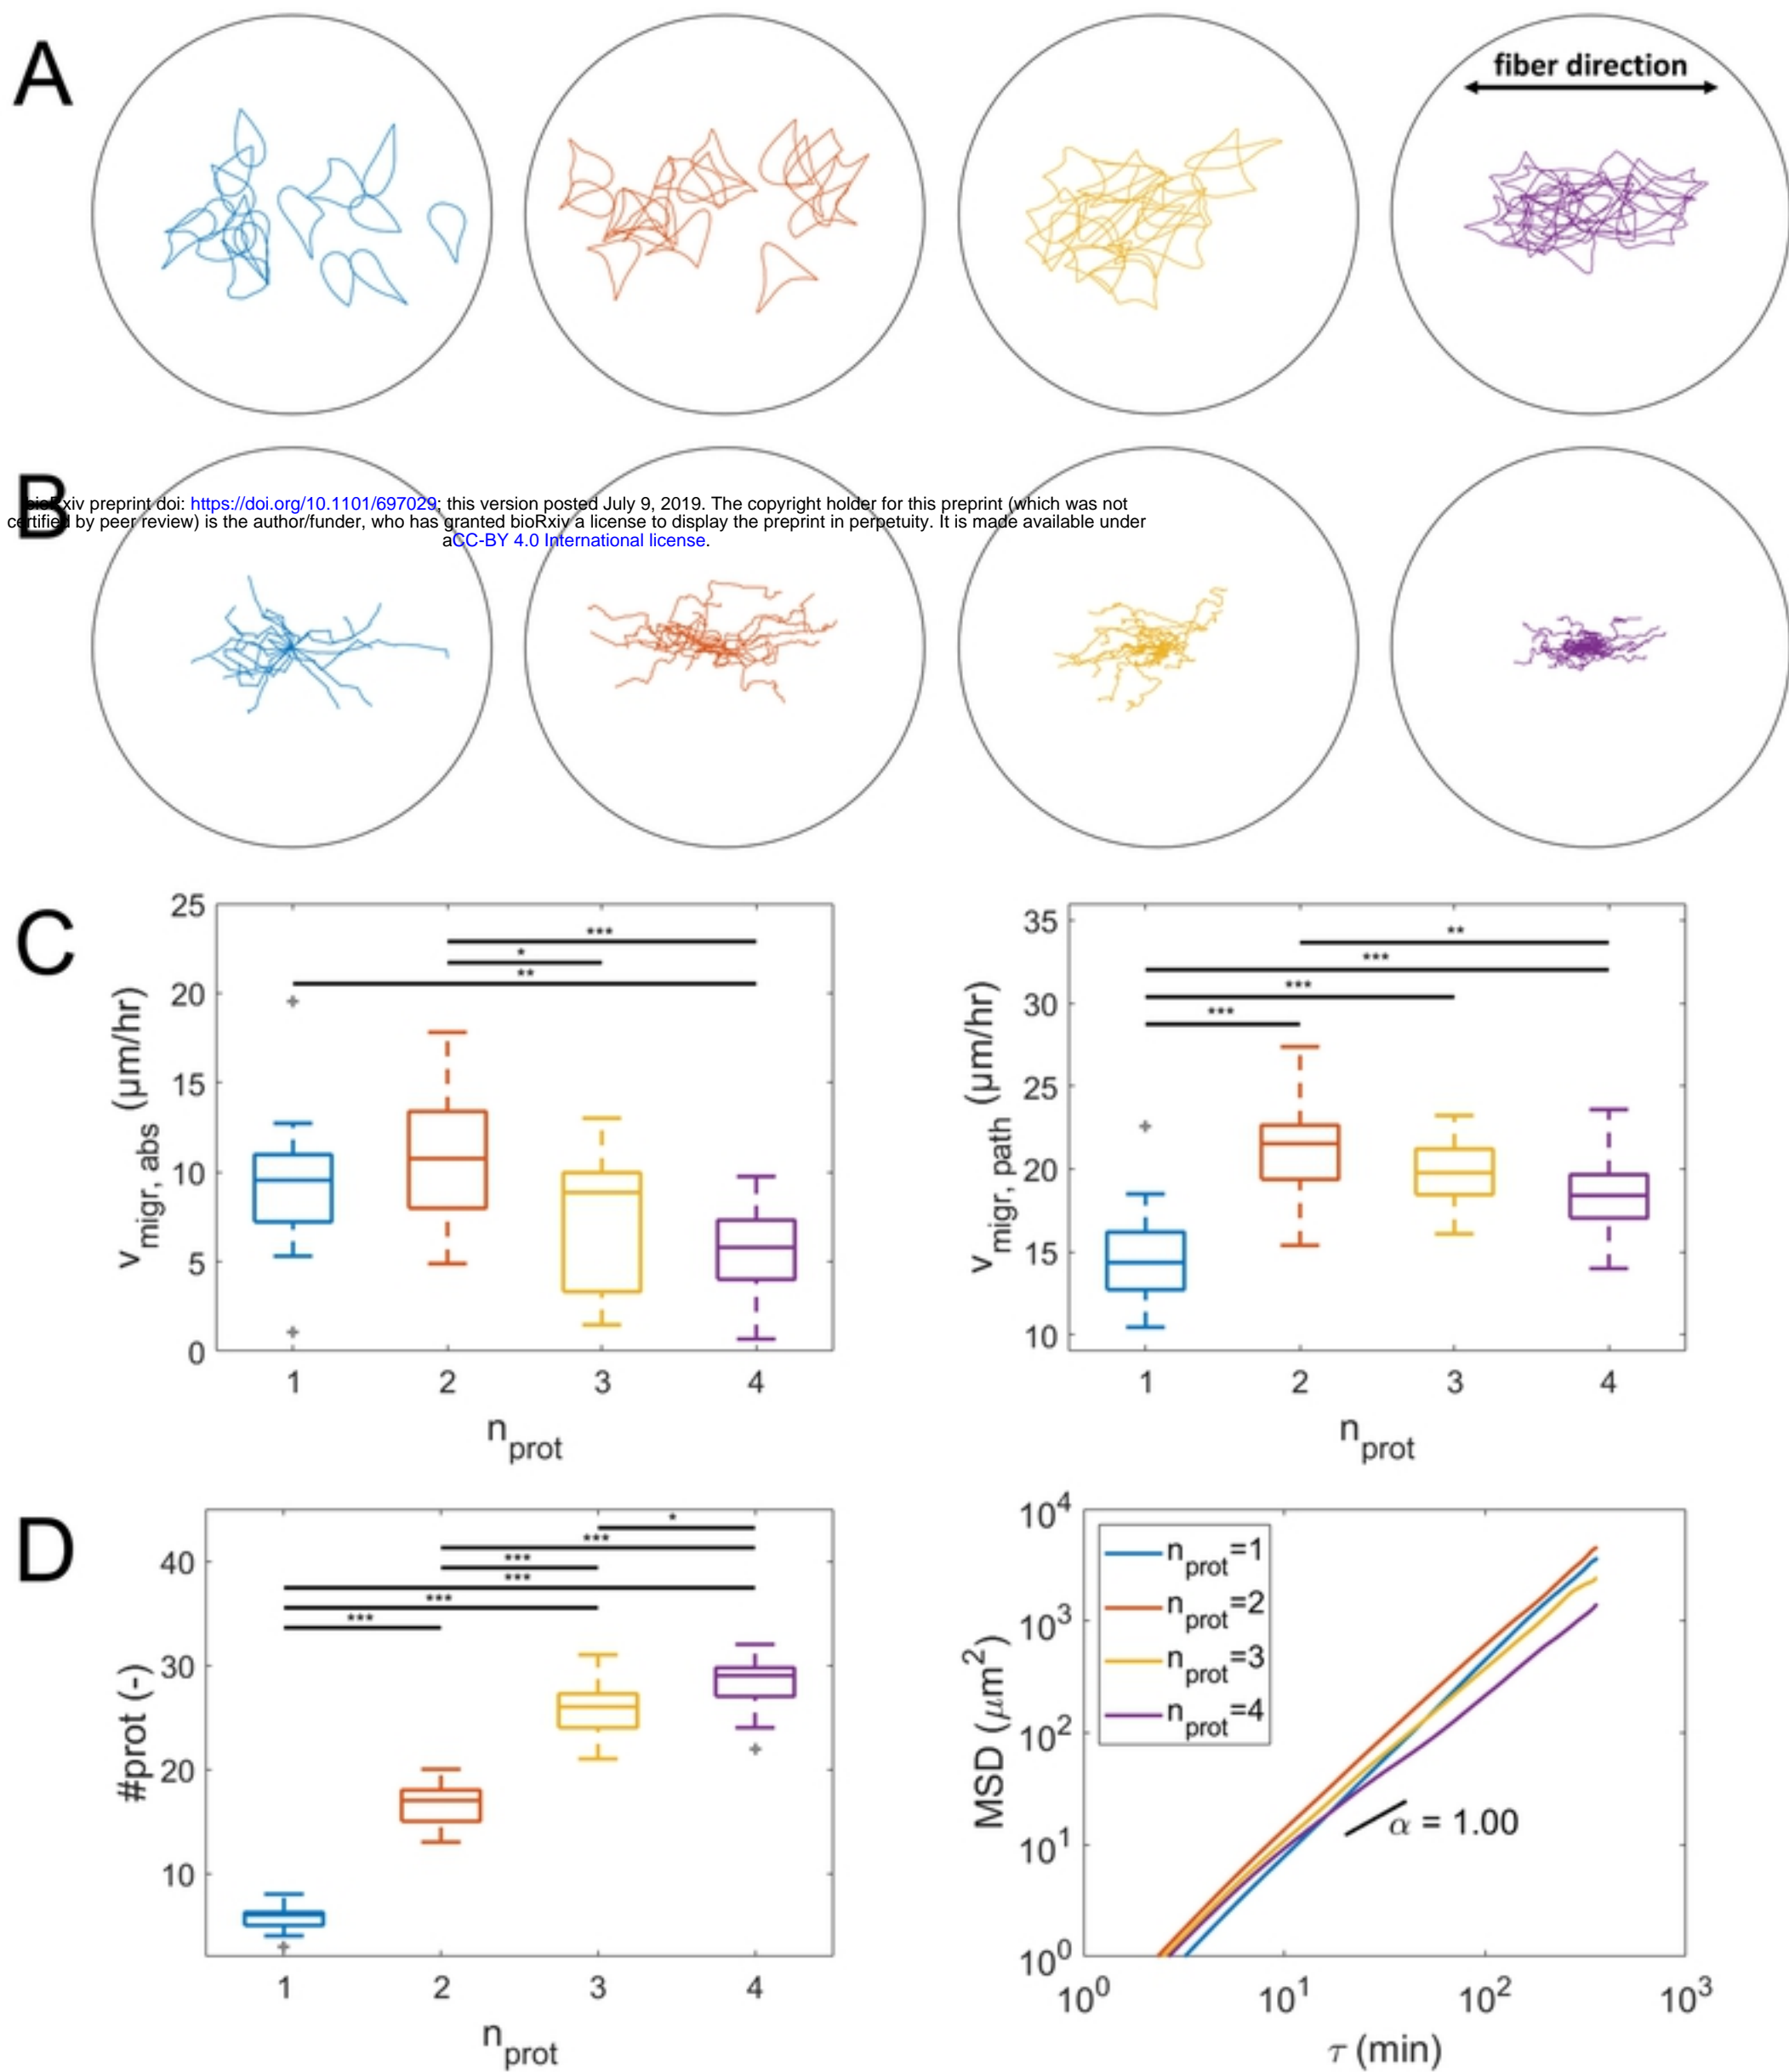

Fig10



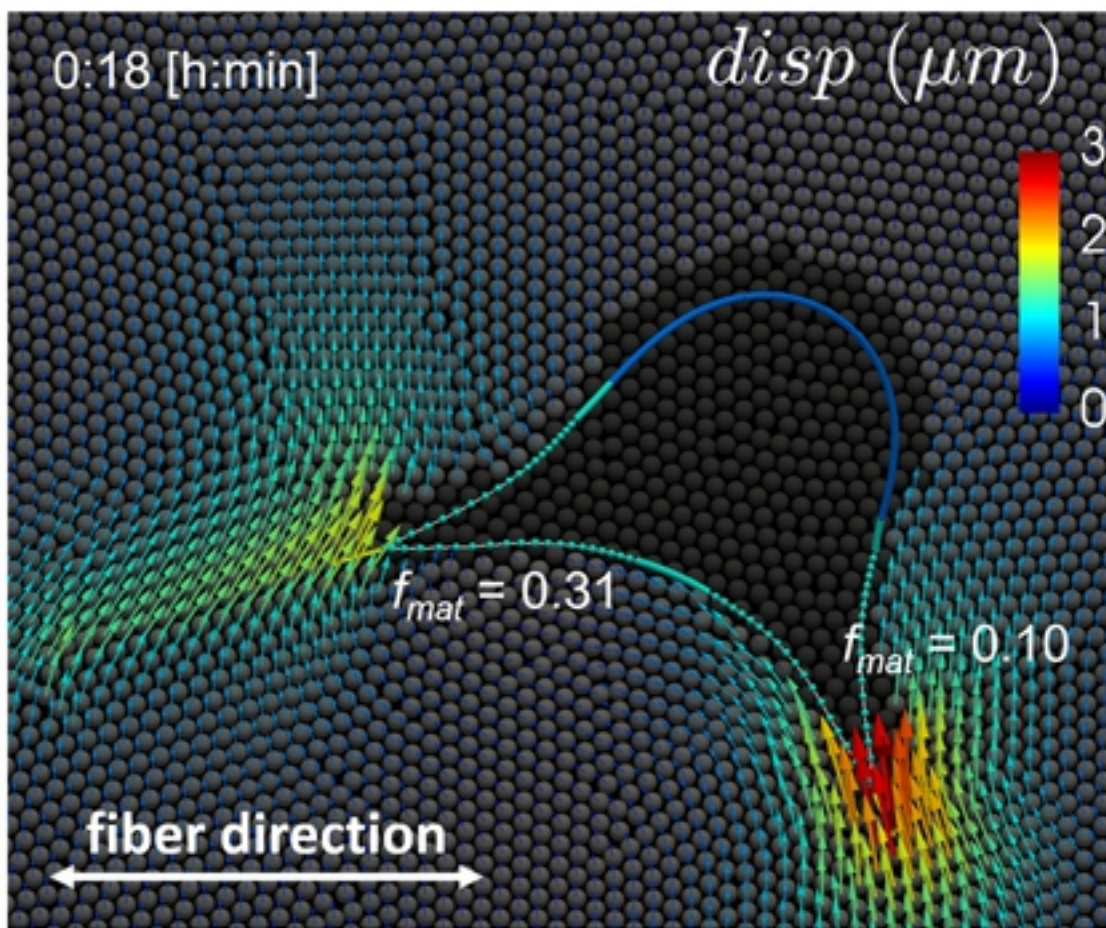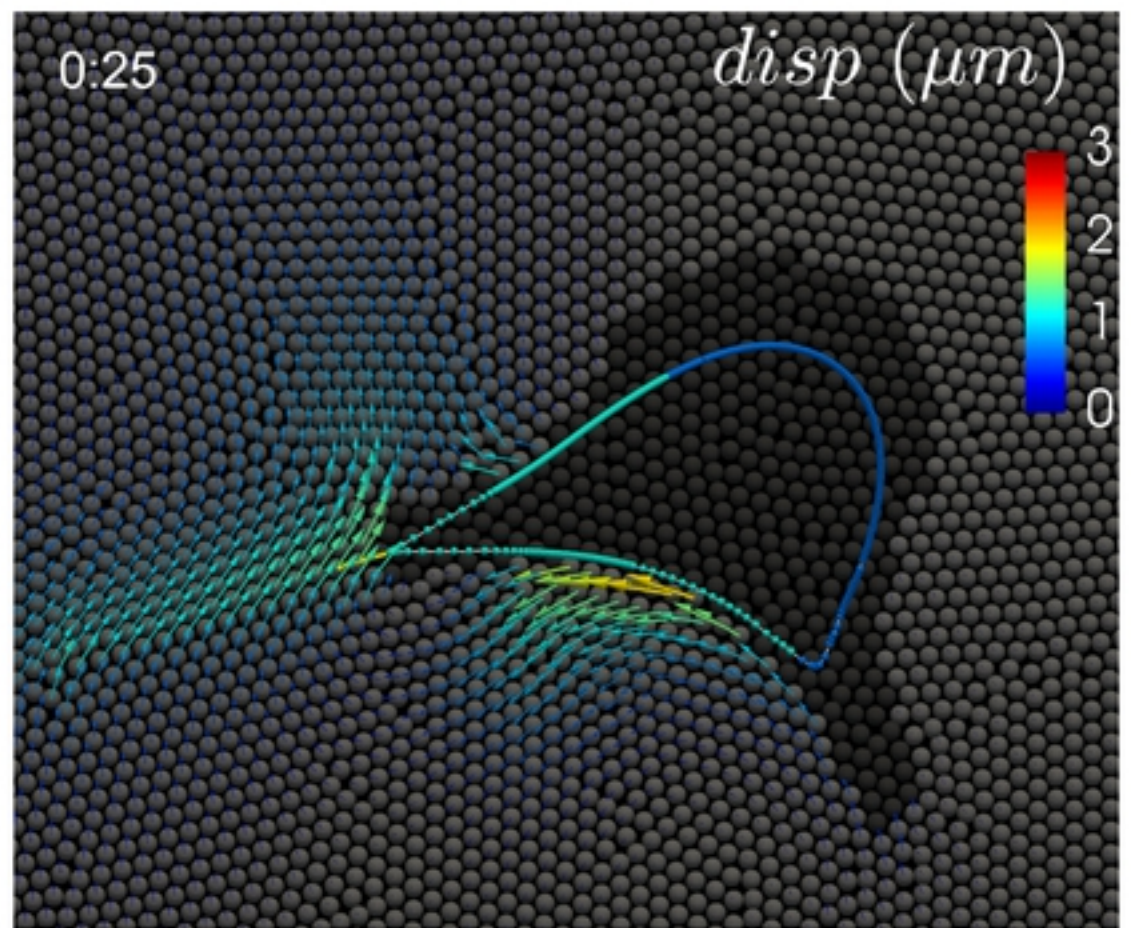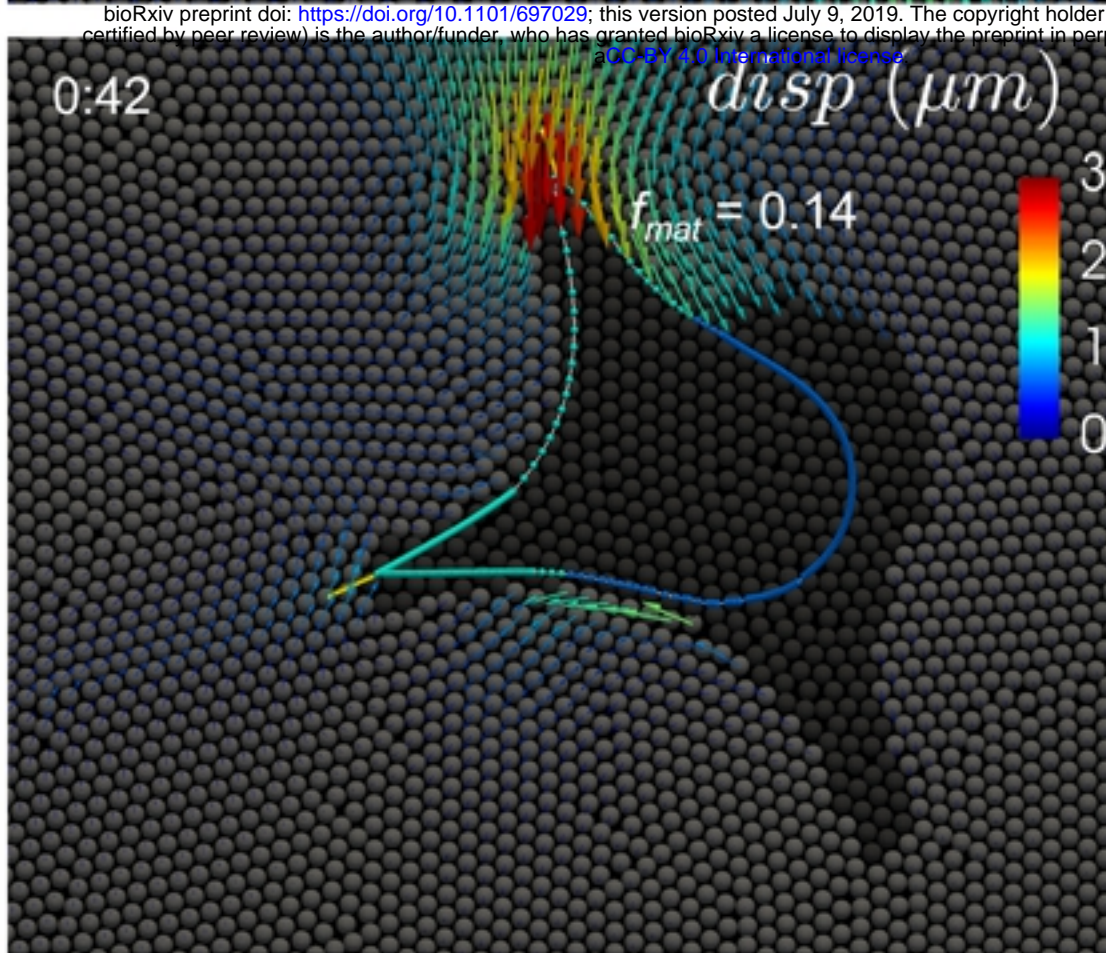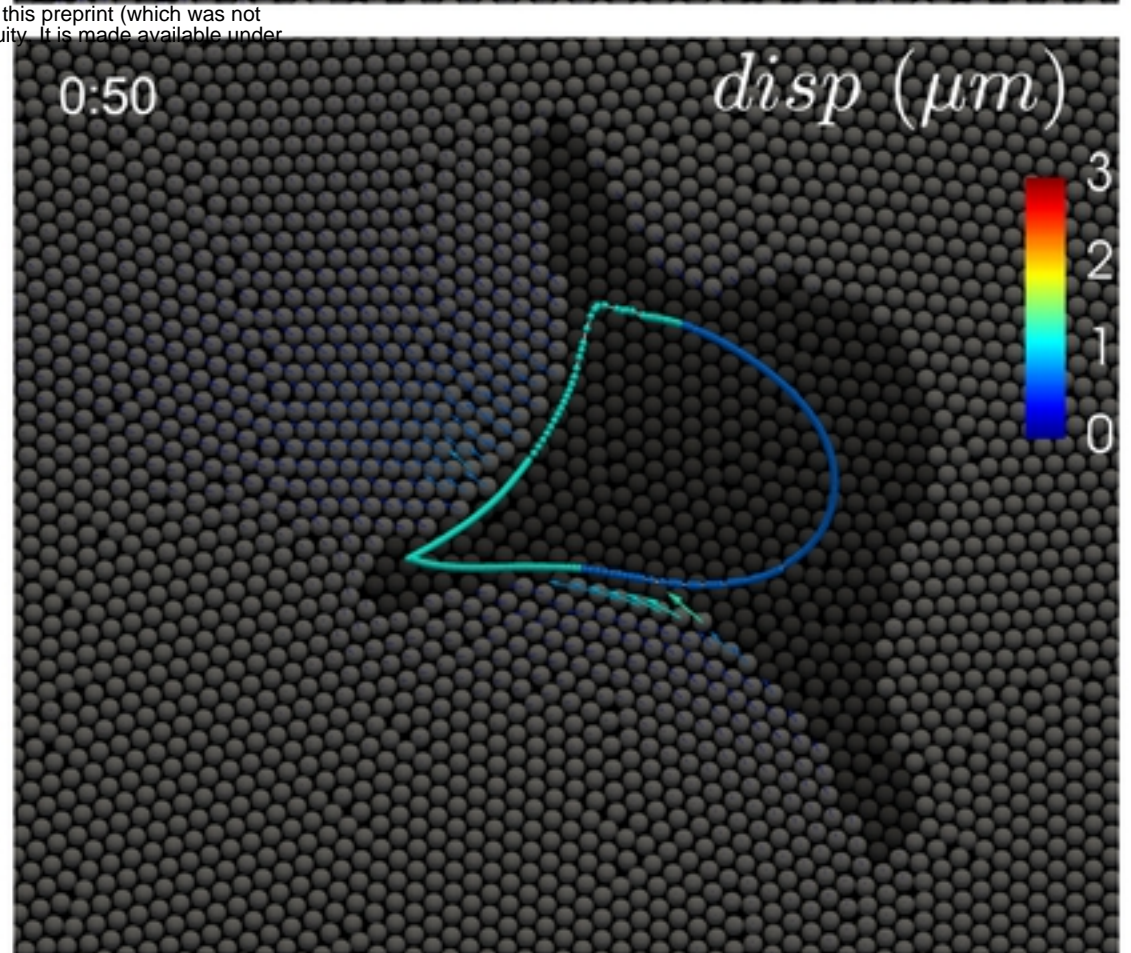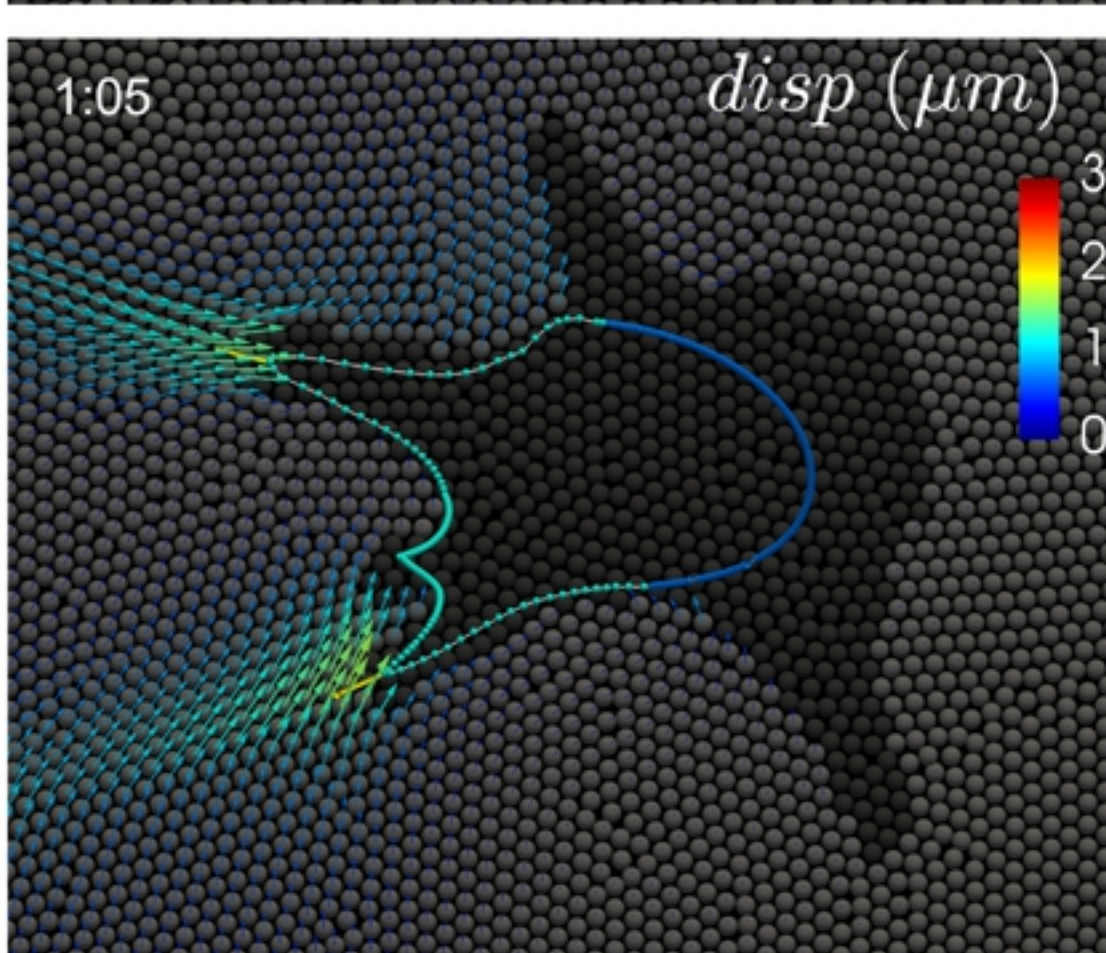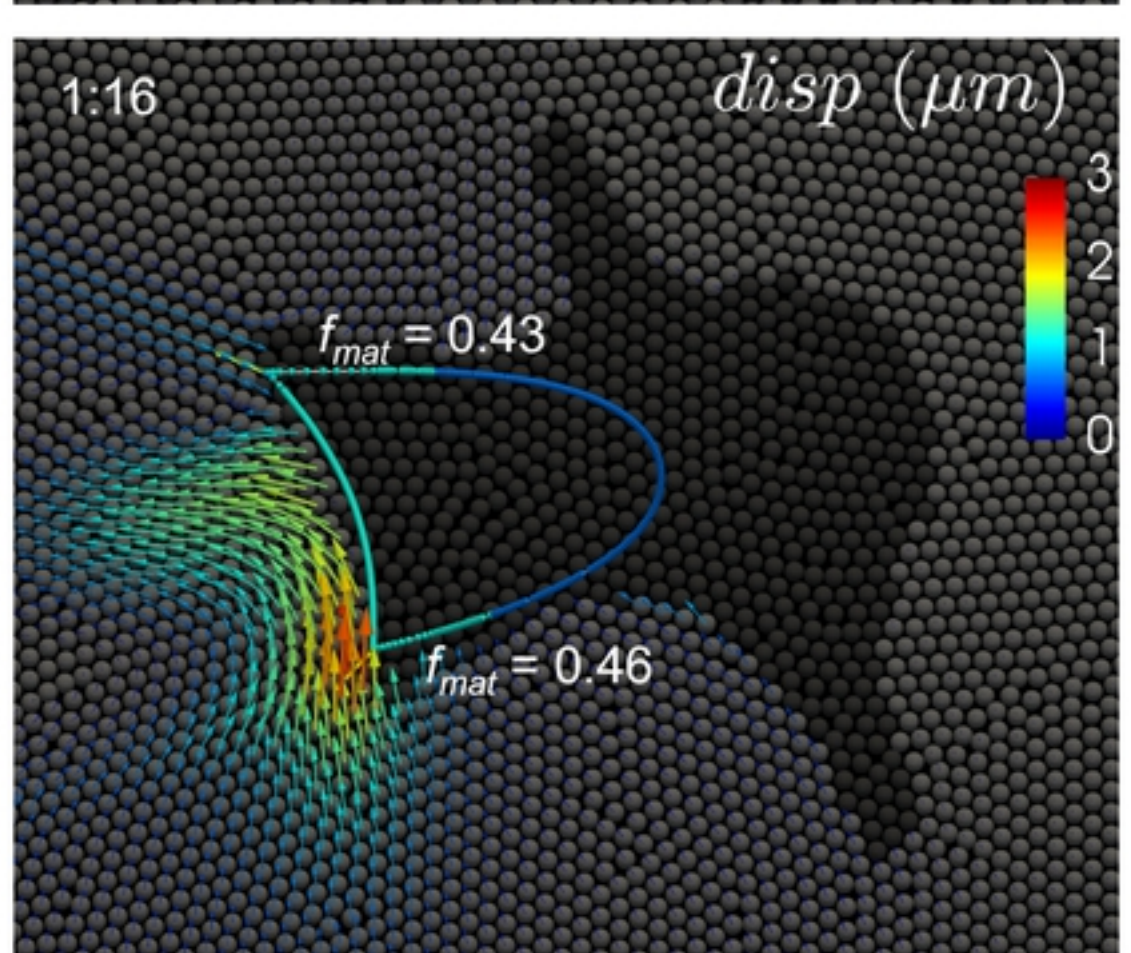

Fig1 1
